# Supplementary figures and images for: Characterization of colibactin-associated mutational signature in an Asian oral squamous cell carcinoma and in other mucosal tumor types (part 1 of 2)
Source: HighWire-hosted journal article supplement (doi:10.1101/gr.255620.119), 2020-06-01

X0047 CRUK PC 0047 T1 DNA

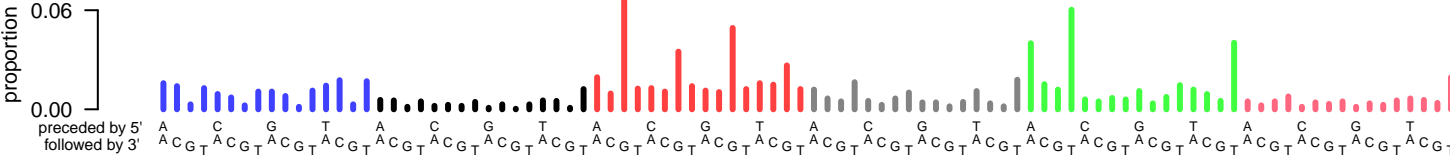

Supplement: Supplemental_Data_S2.zip [file 0047_CRUK_PC_0047_T1_DNA.check.with.sig.pdf › Supplemental_Data_S2/mSigAct_output/0047_CRUK_PC_0047_T1_DNA.check.with.sig.pdf]

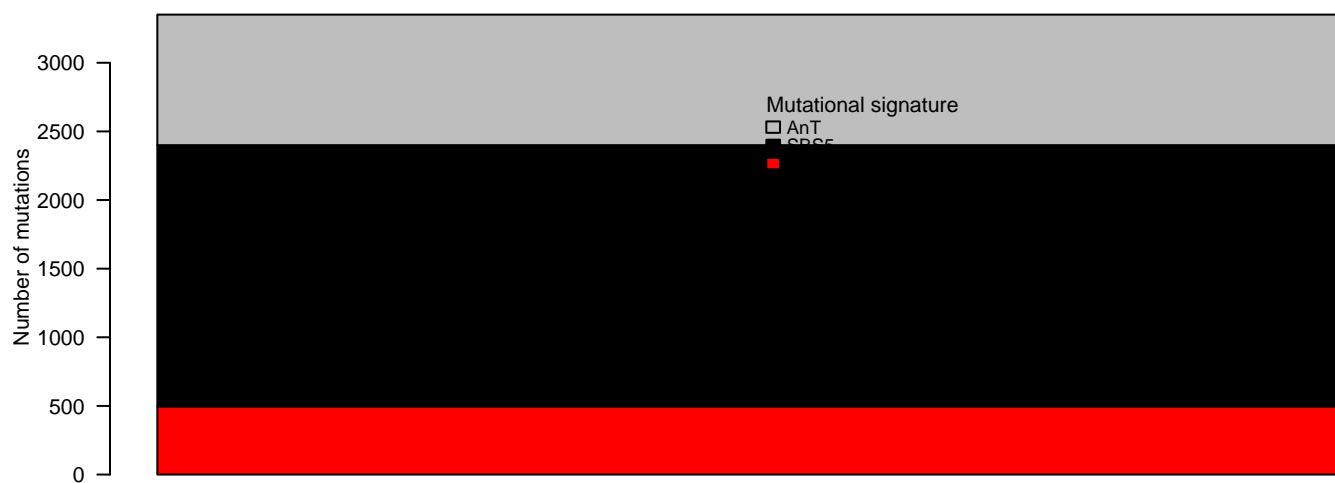

Supplement: Supplemental_Data_S2.zip [file 0047_CRUK_PC_0047_T1_DNA.exposures.pdf › Supplemental_Data_S2/mSigAct_output/0047_CRUK_PC_0047_T1_DNA.exposures.pdf]

**Histogram of out.pvals**

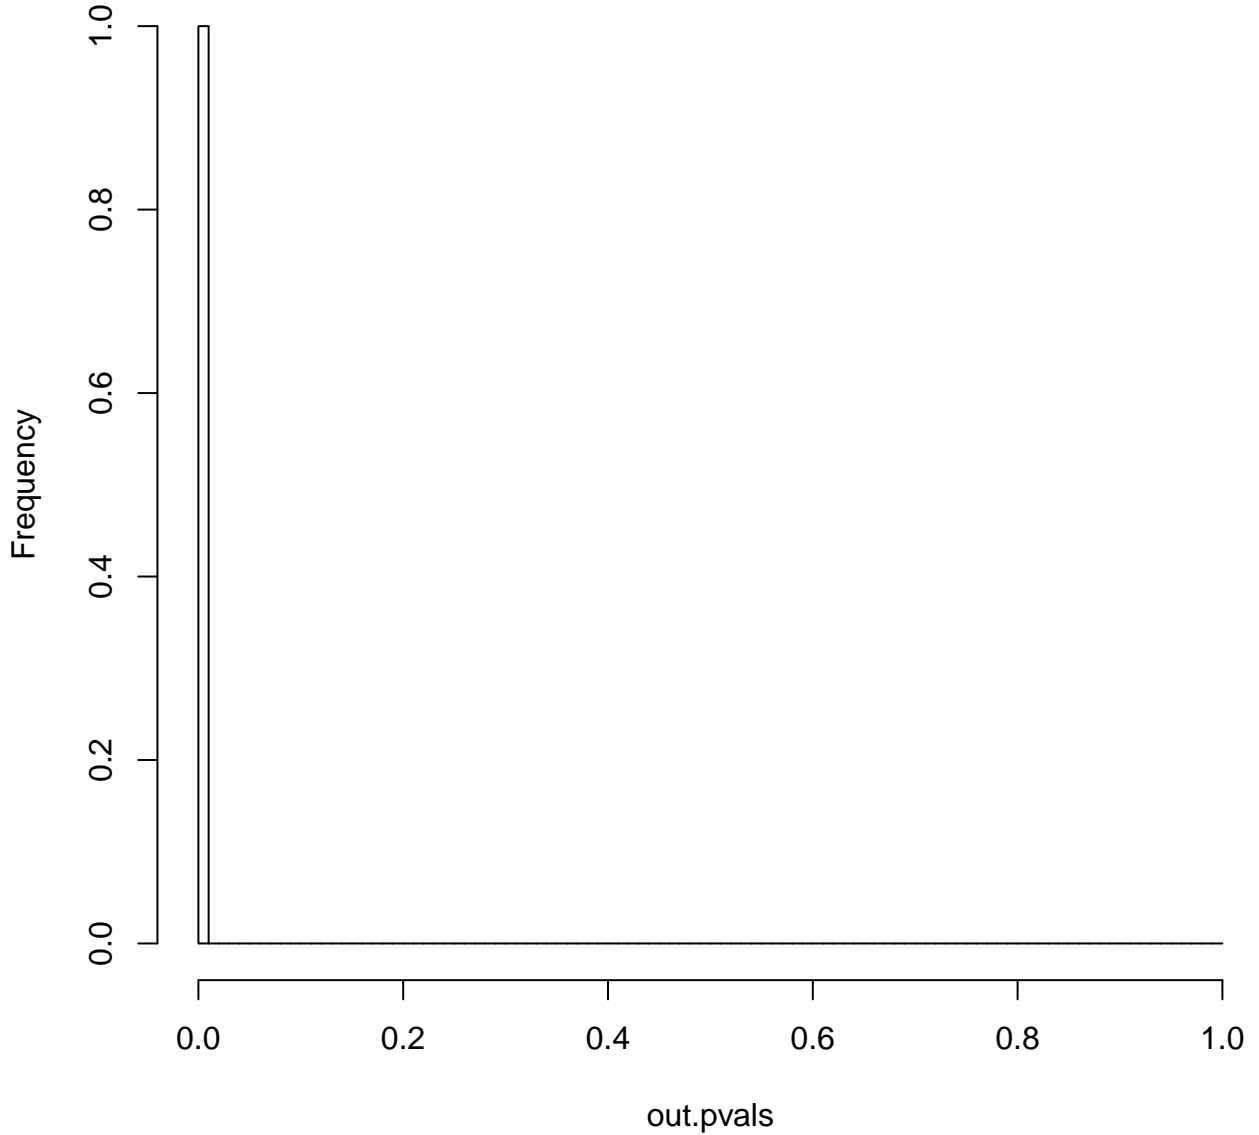

Supplement: Supplemental_Data_S2.zip [file 0047_CRUK_PC_0047_T1_DNA.pval.histogram.pdf › Supplemental_Data_S2/mSigAct_output/0047_CRUK_PC_0047_T1_DNA.pval.histogram.pdf]

Reconstruction error

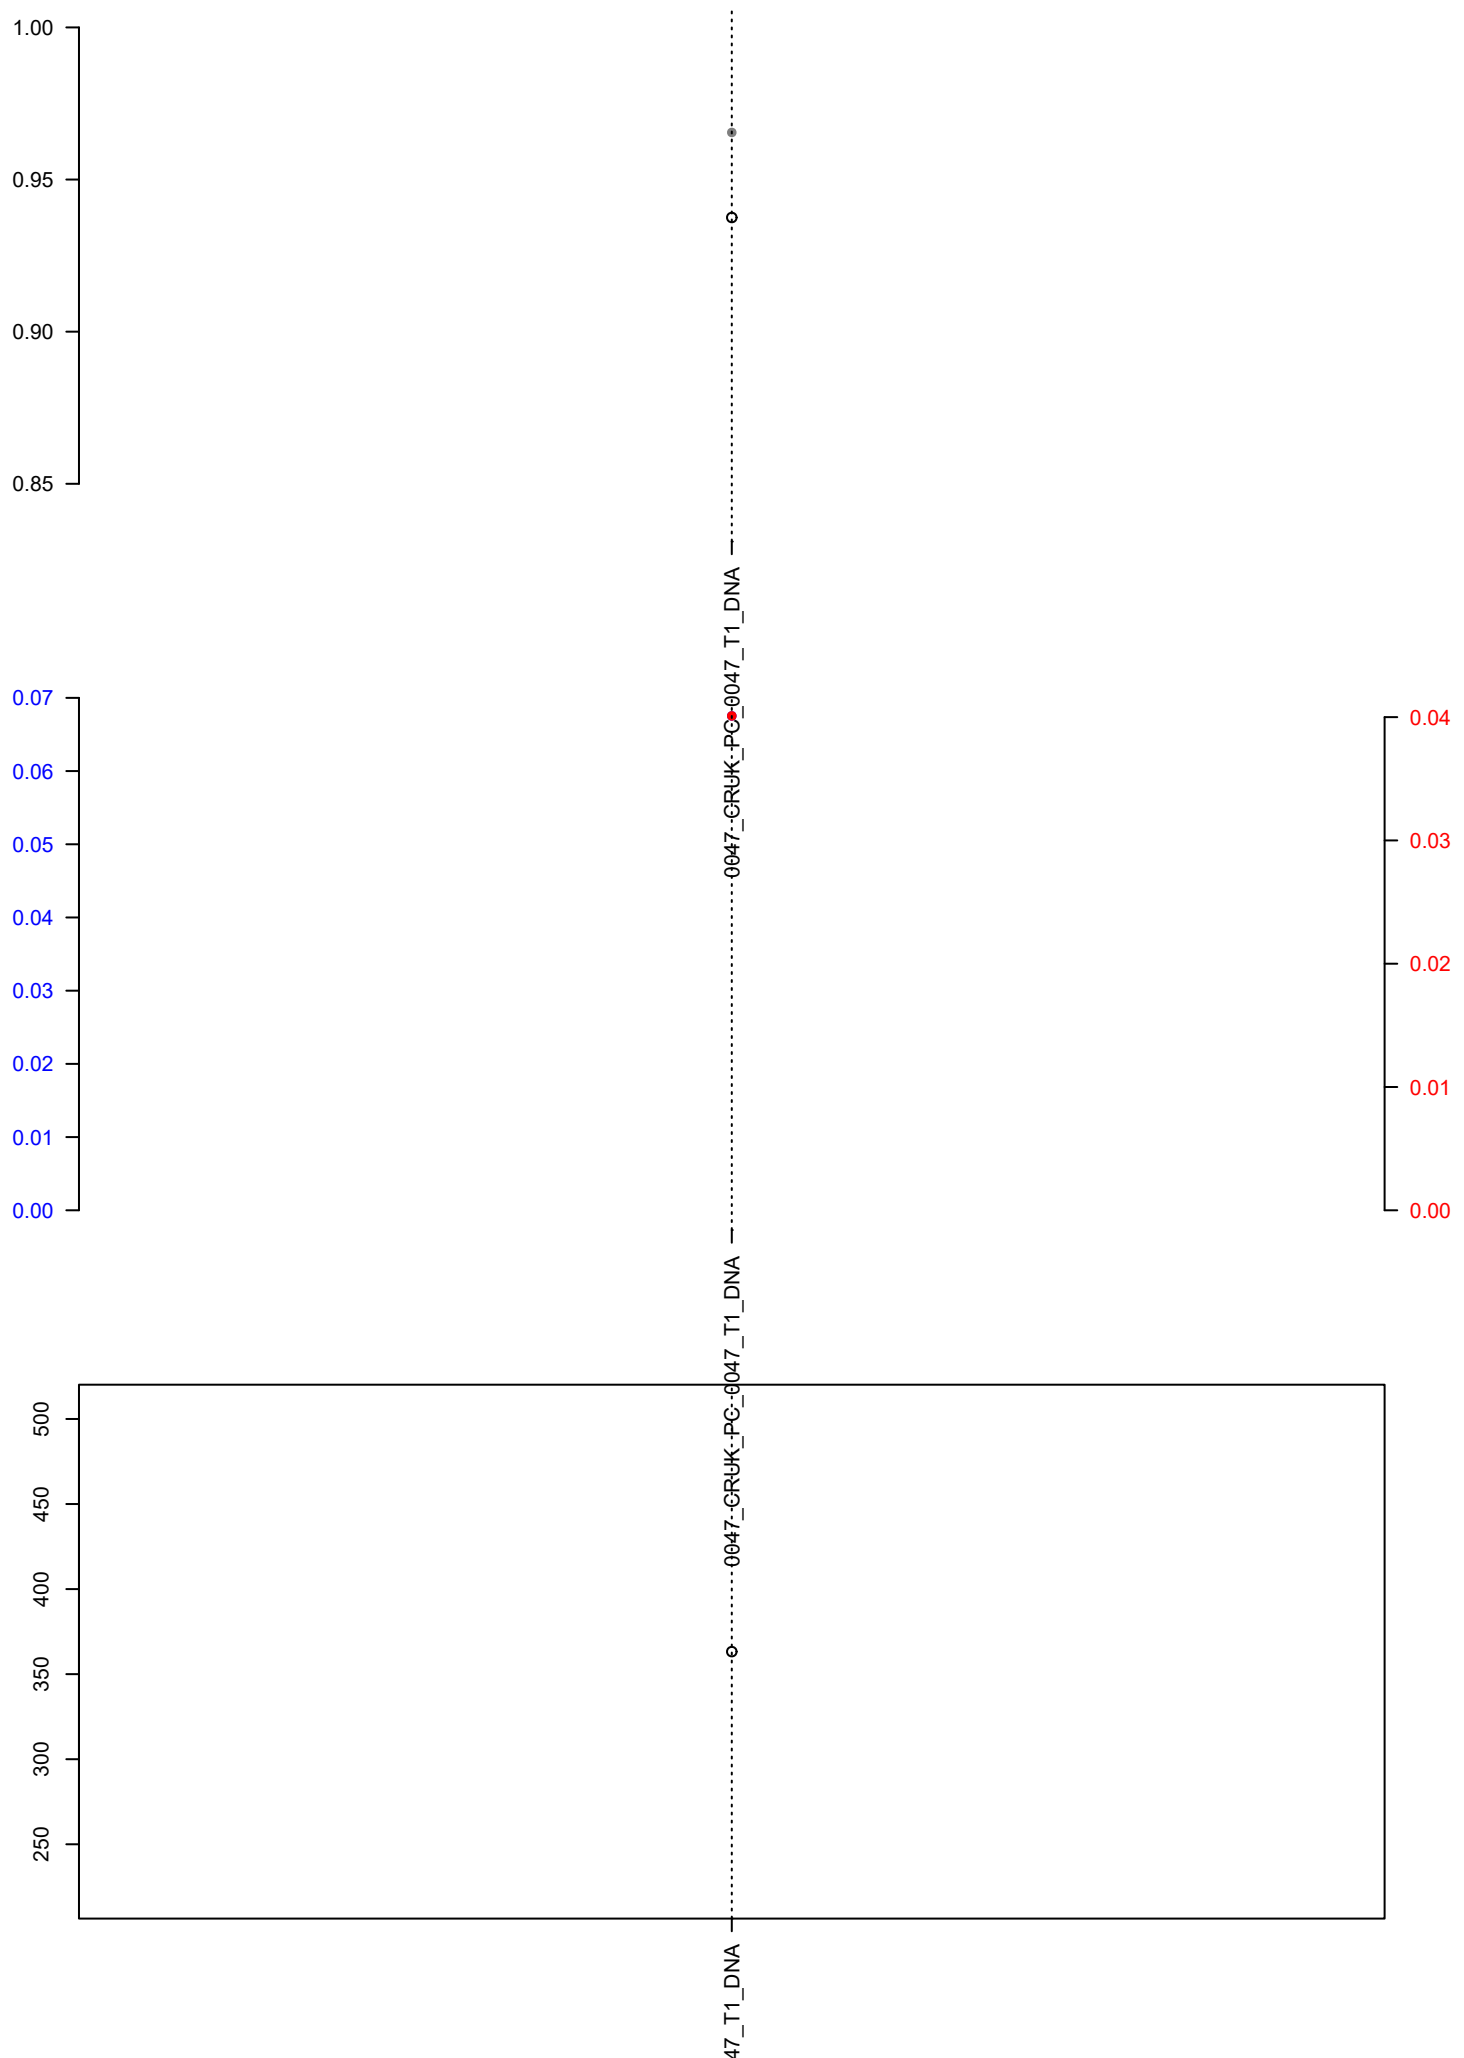

Supplement: Supplemental_Data_S2.zip [file 0047_CRUK_PC_0047_T1_DNA.reconstruction.err.pdf › Supplemental_Data_S2/mSigAct_output/0047_CRUK_PC_0047_T1_DNA.reconstruction.err.pdf]

X8069334

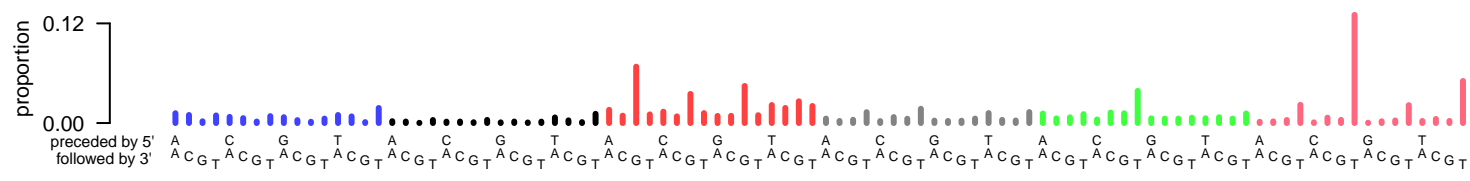

Supplement: Supplemental_Data_S2.zip [file 8069334.check.with.sig.pdf › Supplemental_Data_S2/mSigAct_output/8069334.check.with.sig.pdf]

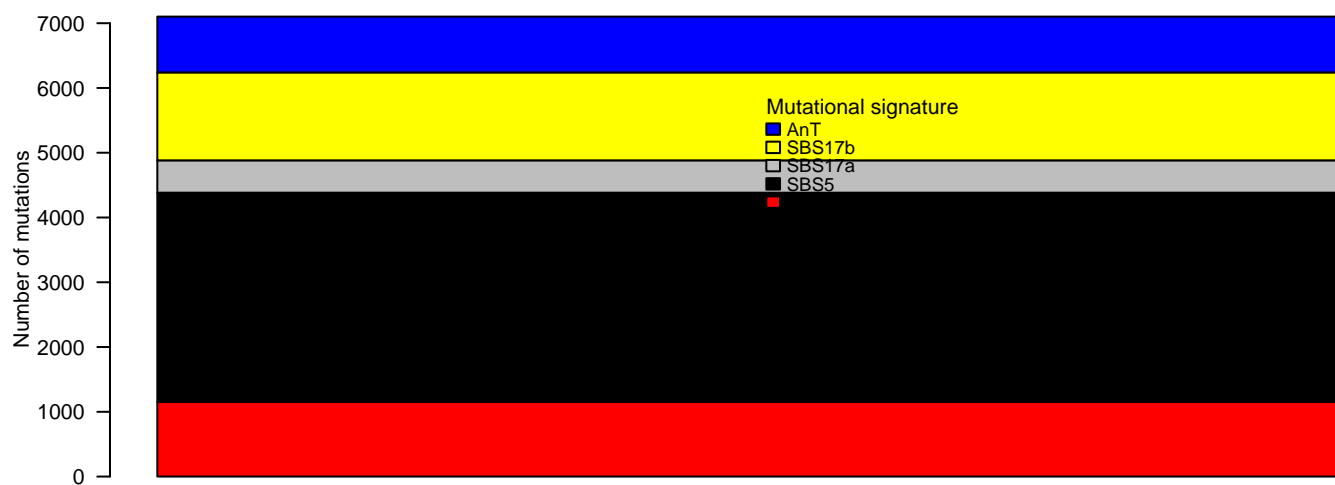

Supplement: Supplemental_Data_S2.zip [file 8069334.exposures.pdf › Supplemental_Data_S2/mSigAct_output/8069334.exposures.pdf]

**Histogram of out.pvals**

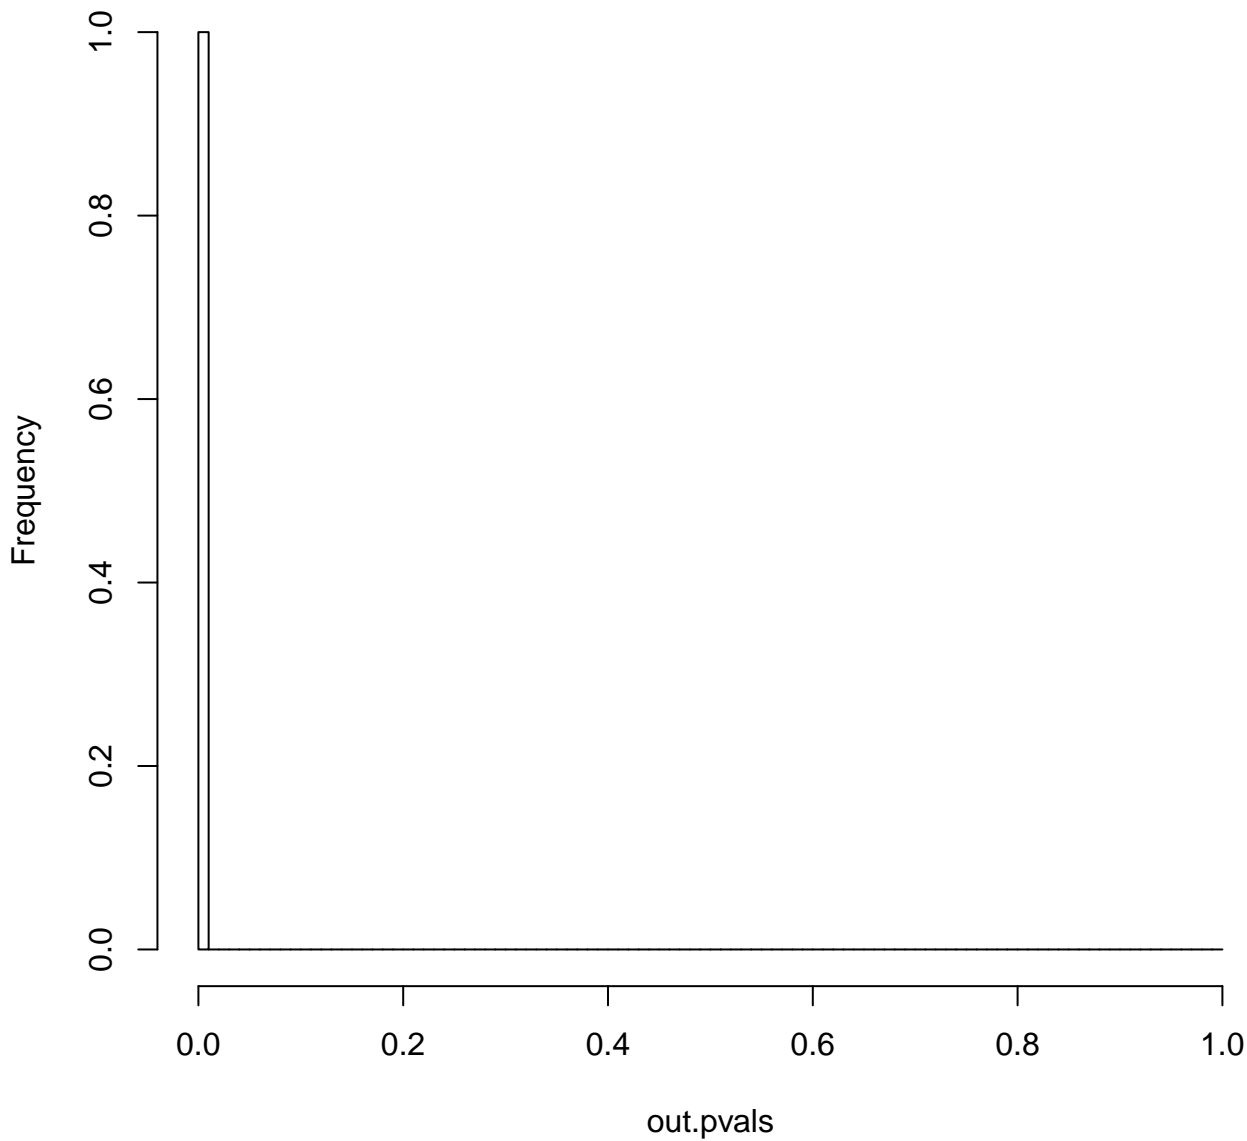

Supplement: Supplemental_Data_S2.zip [file 8069334.pval.histogram.pdf › Supplemental_Data_S2/mSigAct_output/8069334.pval.histogram.pdf]

Reconstruction error

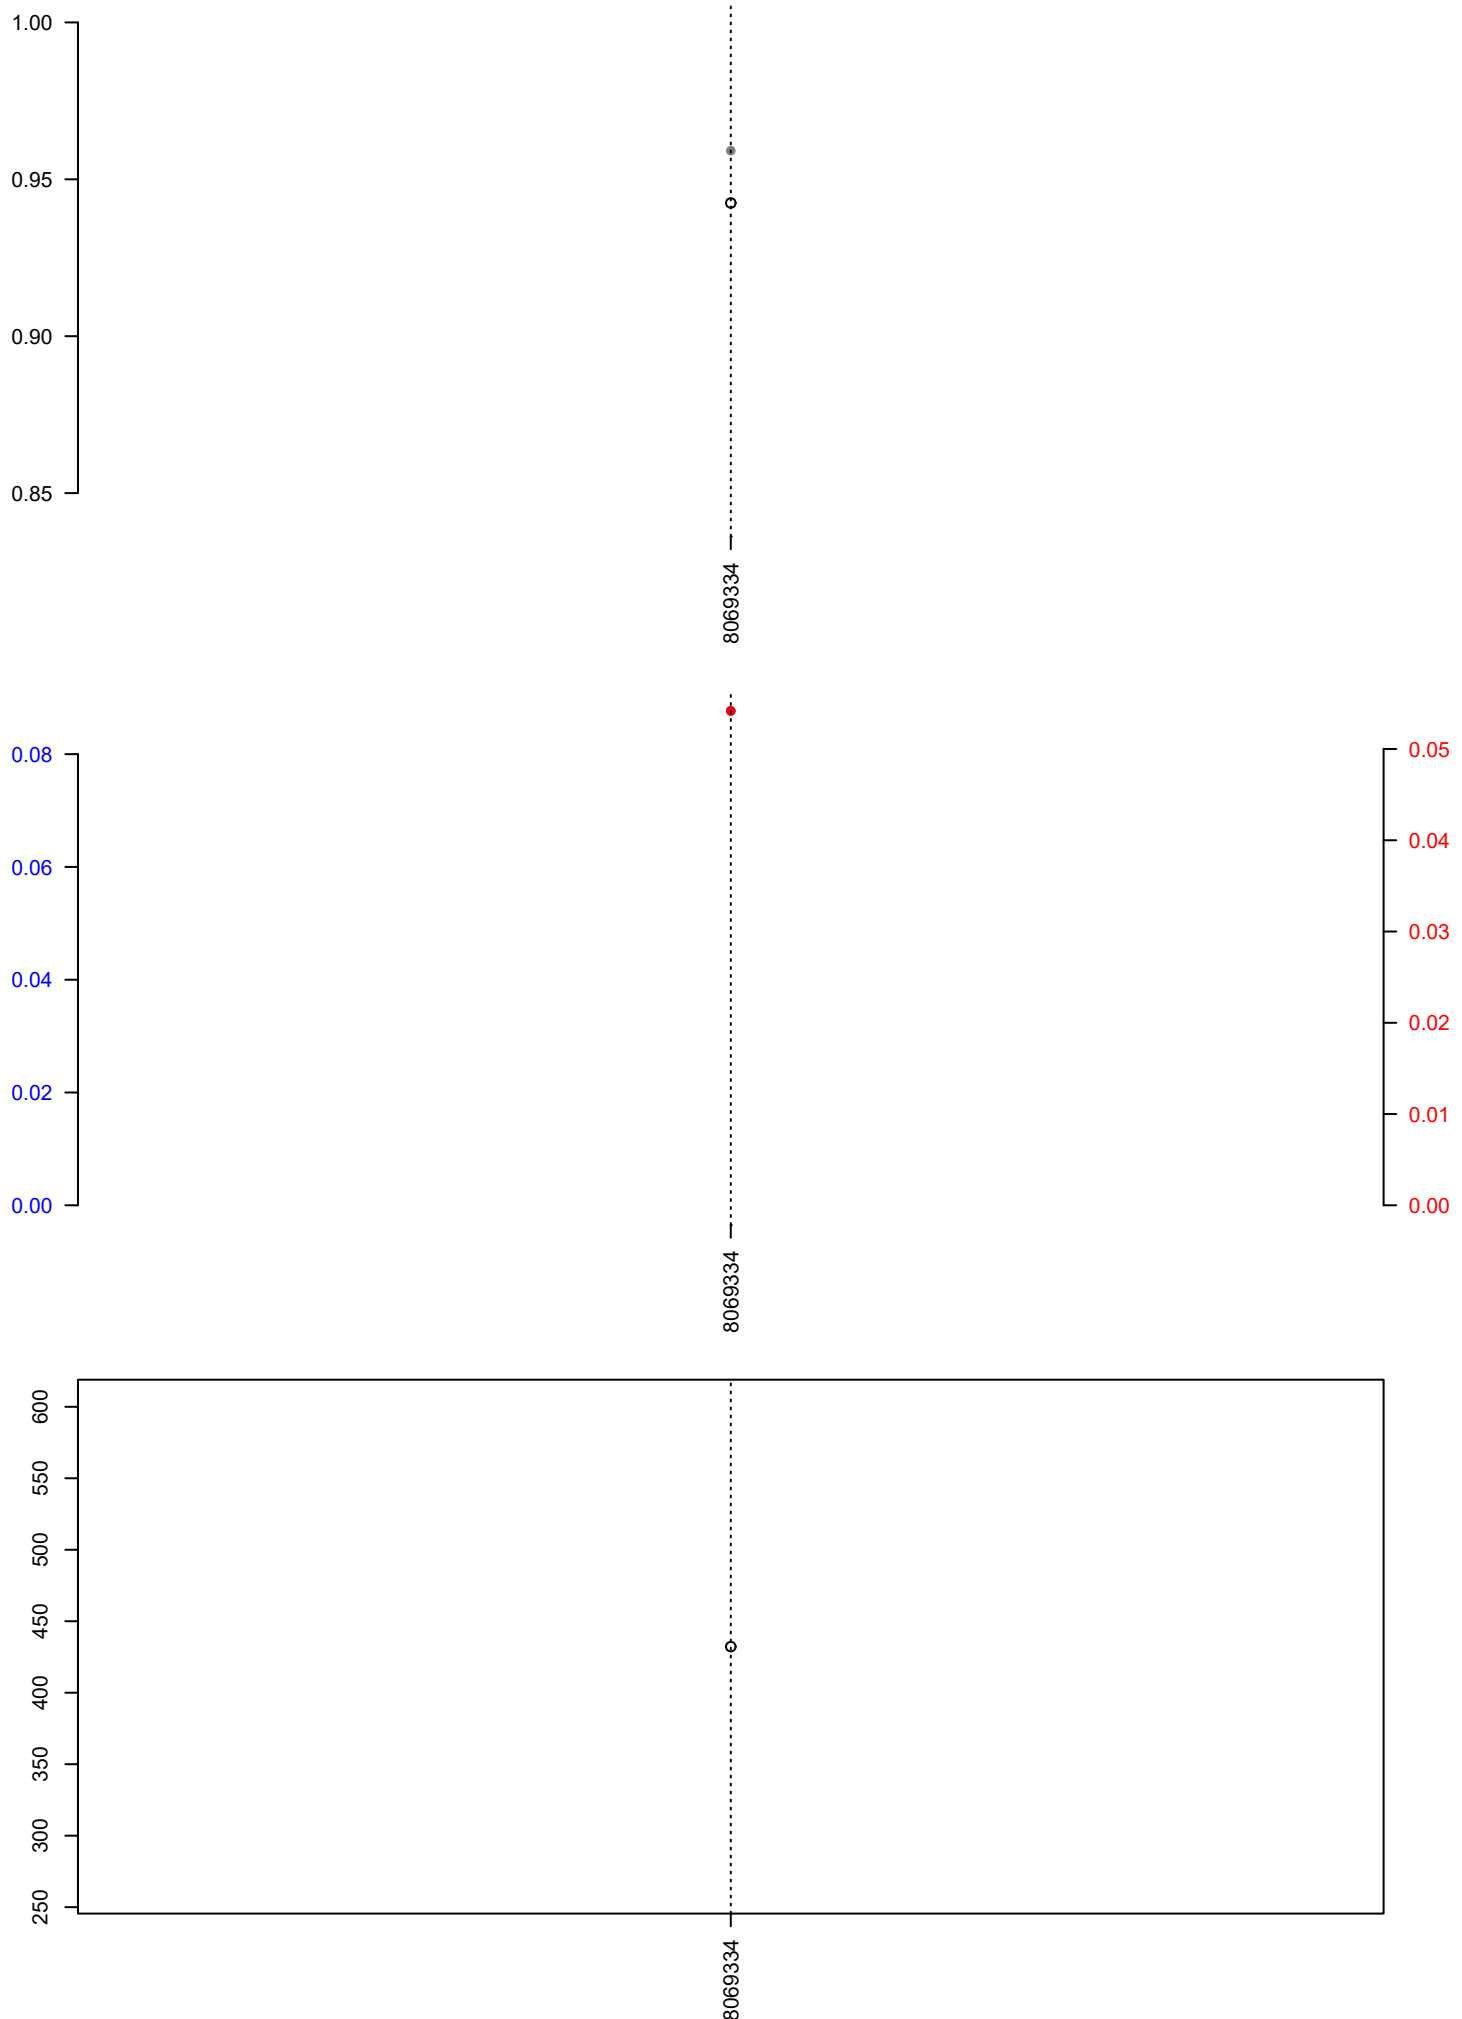

Supplement: Supplemental_Data_S2.zip [file 8069334.reconstruction.err.pdf › Supplemental_Data_S2/mSigAct_output/8069334.reconstruction.err.pdf]

## BD121T

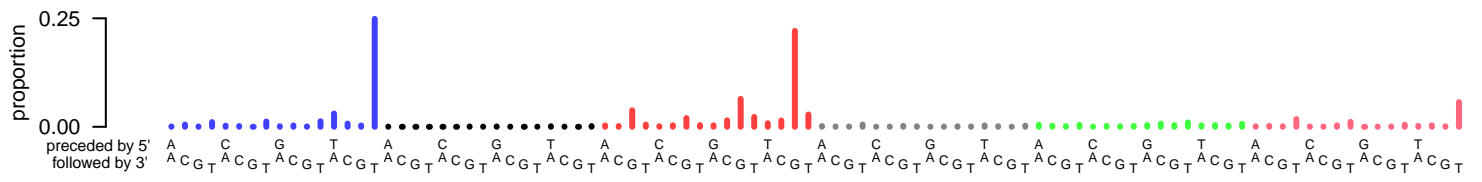

Supplement: Supplemental_Data_S2.zip [file BD121T.check.with.sig.pdf › Supplemental_Data_S2/mSigAct_output/BD121T.check.with.sig.pdf]

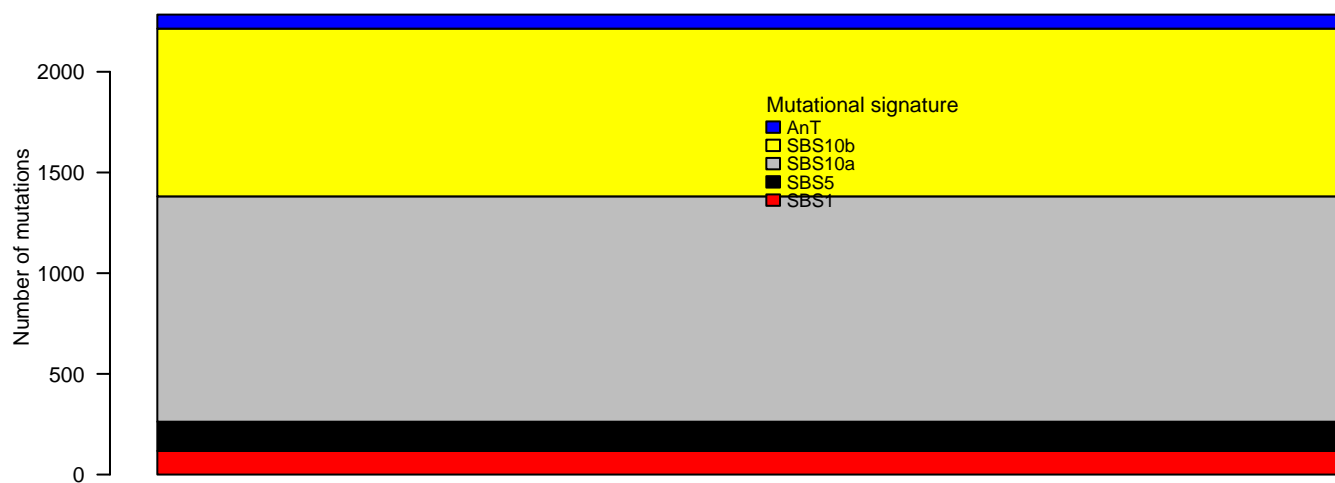

Supplement: Supplemental_Data_S2.zip [file BD121T.exposures.pdf › Supplemental_Data_S2/mSigAct_output/BD121T.exposures.pdf]

**Histogram of out.pvals**



Supplement: Supplemental_Data_S2.zip [file BD121T.pval.histogram.pdf › Supplemental_Data_S2/mSigAct_output/BD121T.pval.histogram.pdf]

Reconstruction error

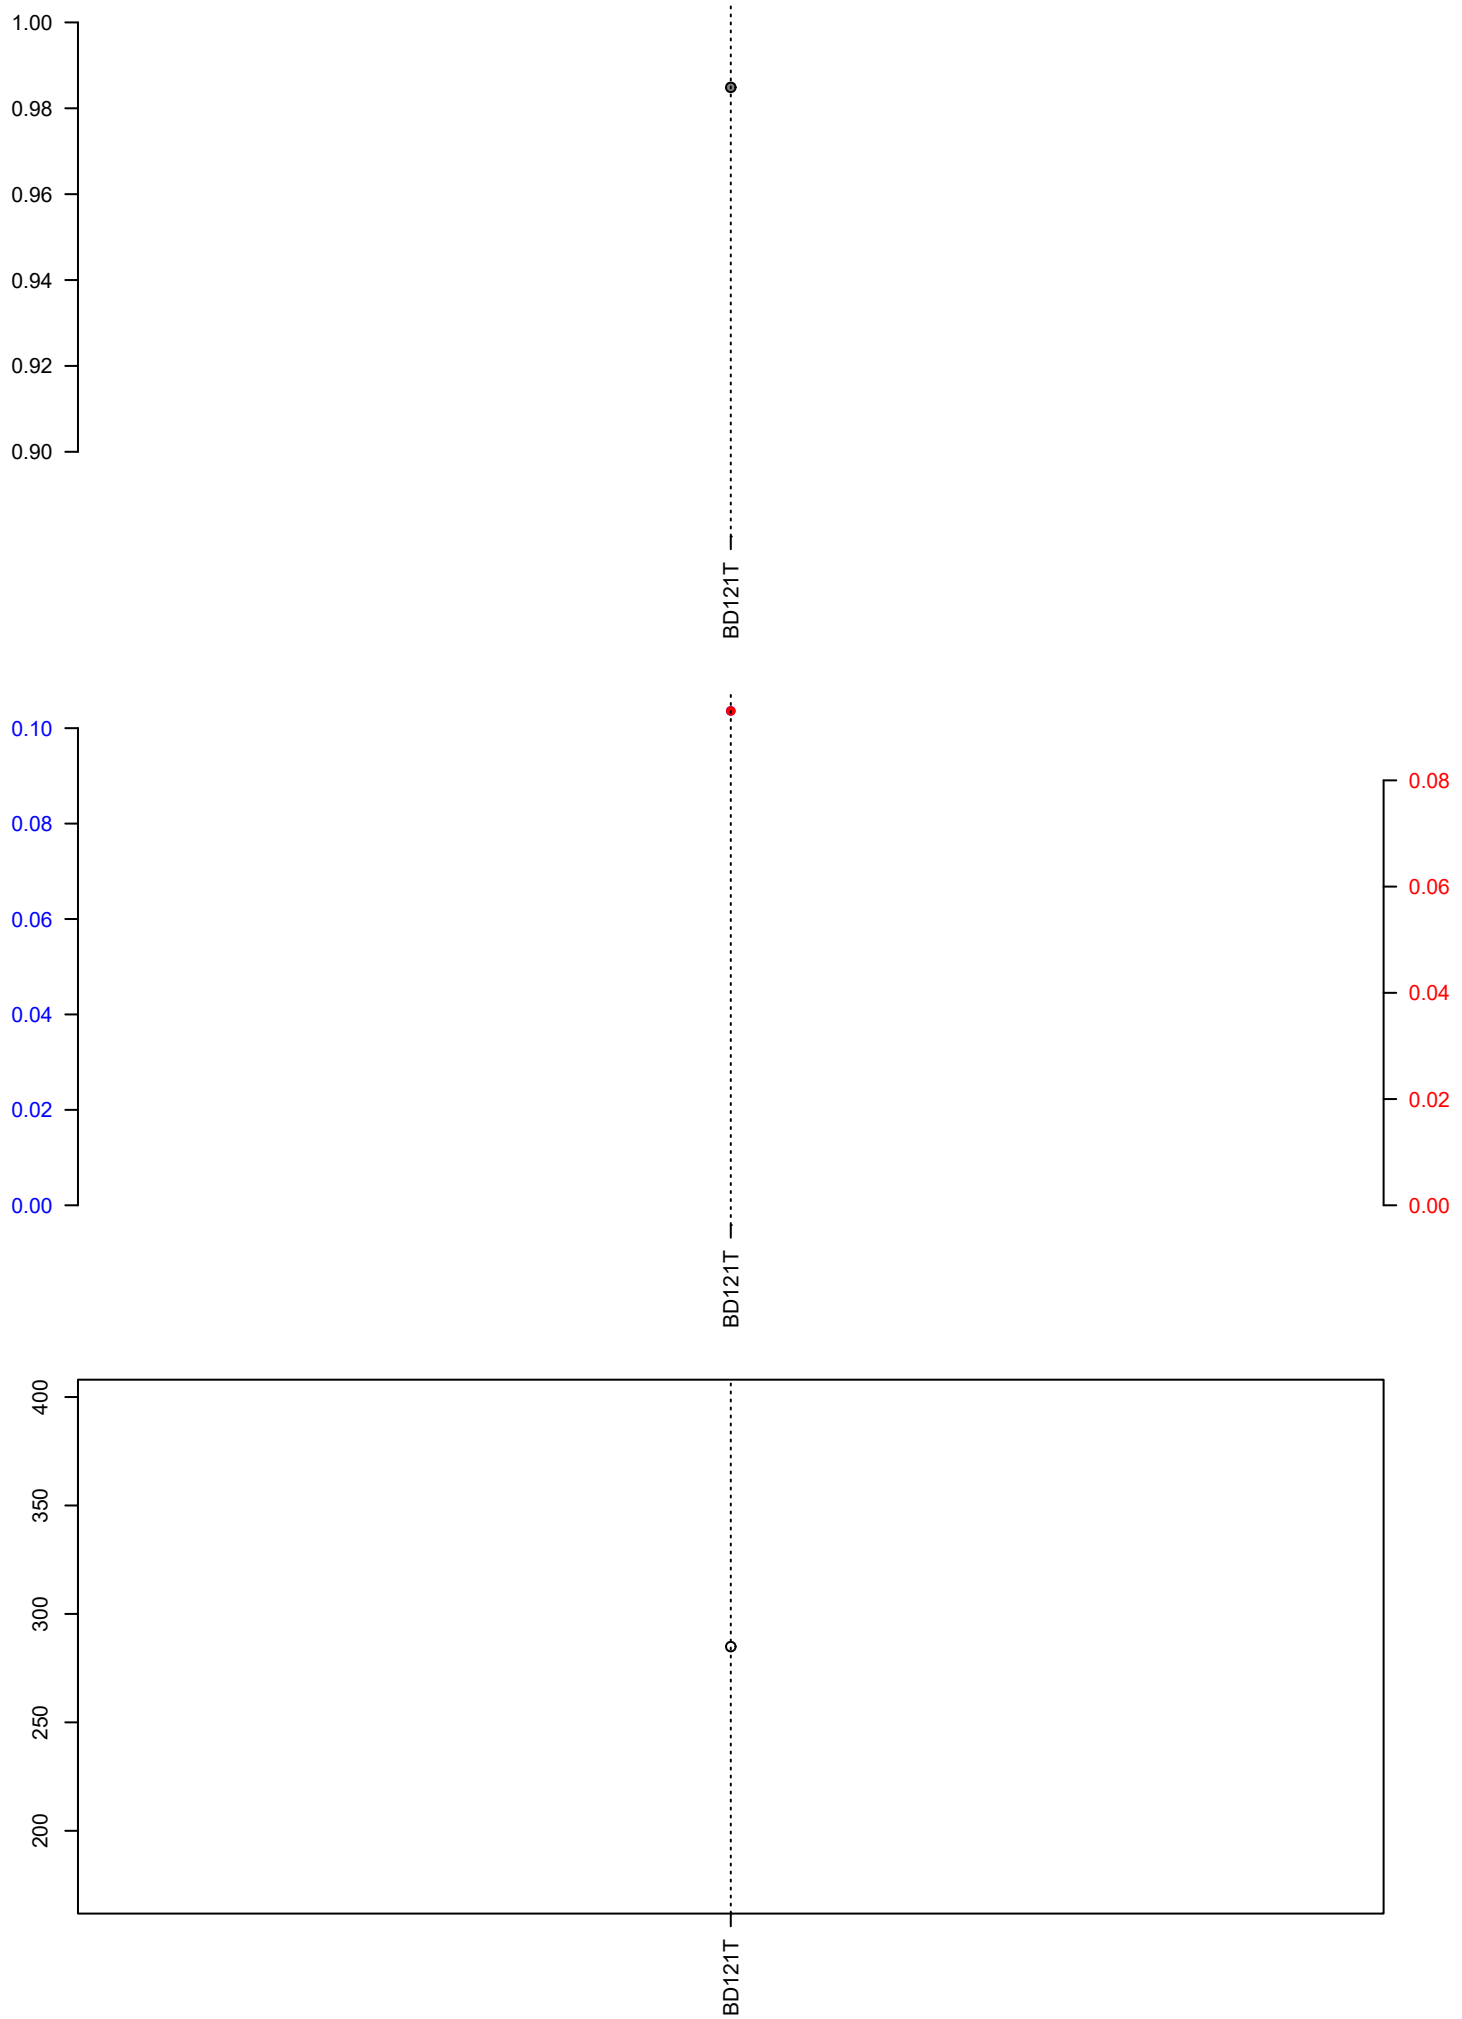

Supplement: Supplemental_Data_S2.zip [file BD121T.reconstruction.err.pdf › Supplemental_Data_S2/mSigAct_output/BD121T.reconstruction.err.pdf]

BD173T

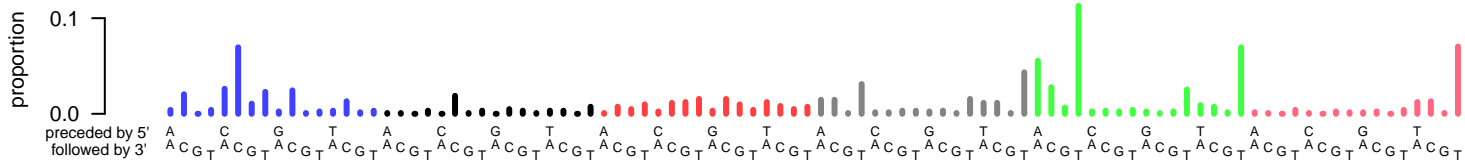

Supplement: Supplemental_Data_S2.zip [file BD173T.check.with.sig.pdf › Supplemental_Data_S2/mSigAct_output/BD173T.check.with.sig.pdf]

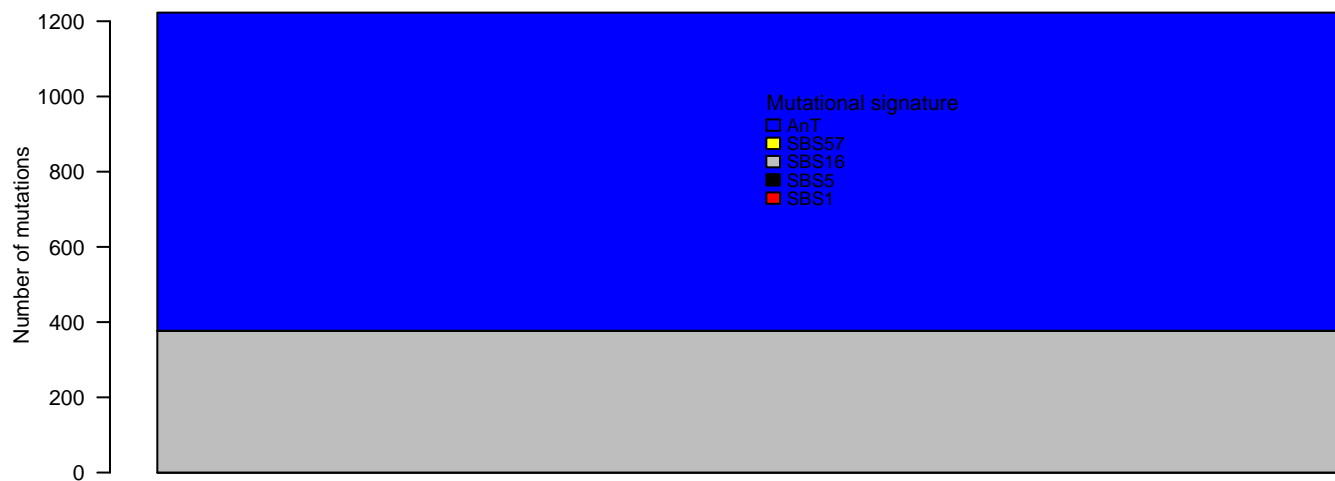

Supplement: Supplemental_Data_S2.zip [file BD173T.exposures.pdf › Supplemental_Data_S2/mSigAct_output/BD173T.exposures.pdf]

**Histogram of out.pvals**



Supplement: Supplemental_Data_S2.zip [file BD173T.pval.histogram.pdf › Supplemental_Data_S2/mSigAct_output/BD173T.pval.histogram.pdf]

Reconstruction error

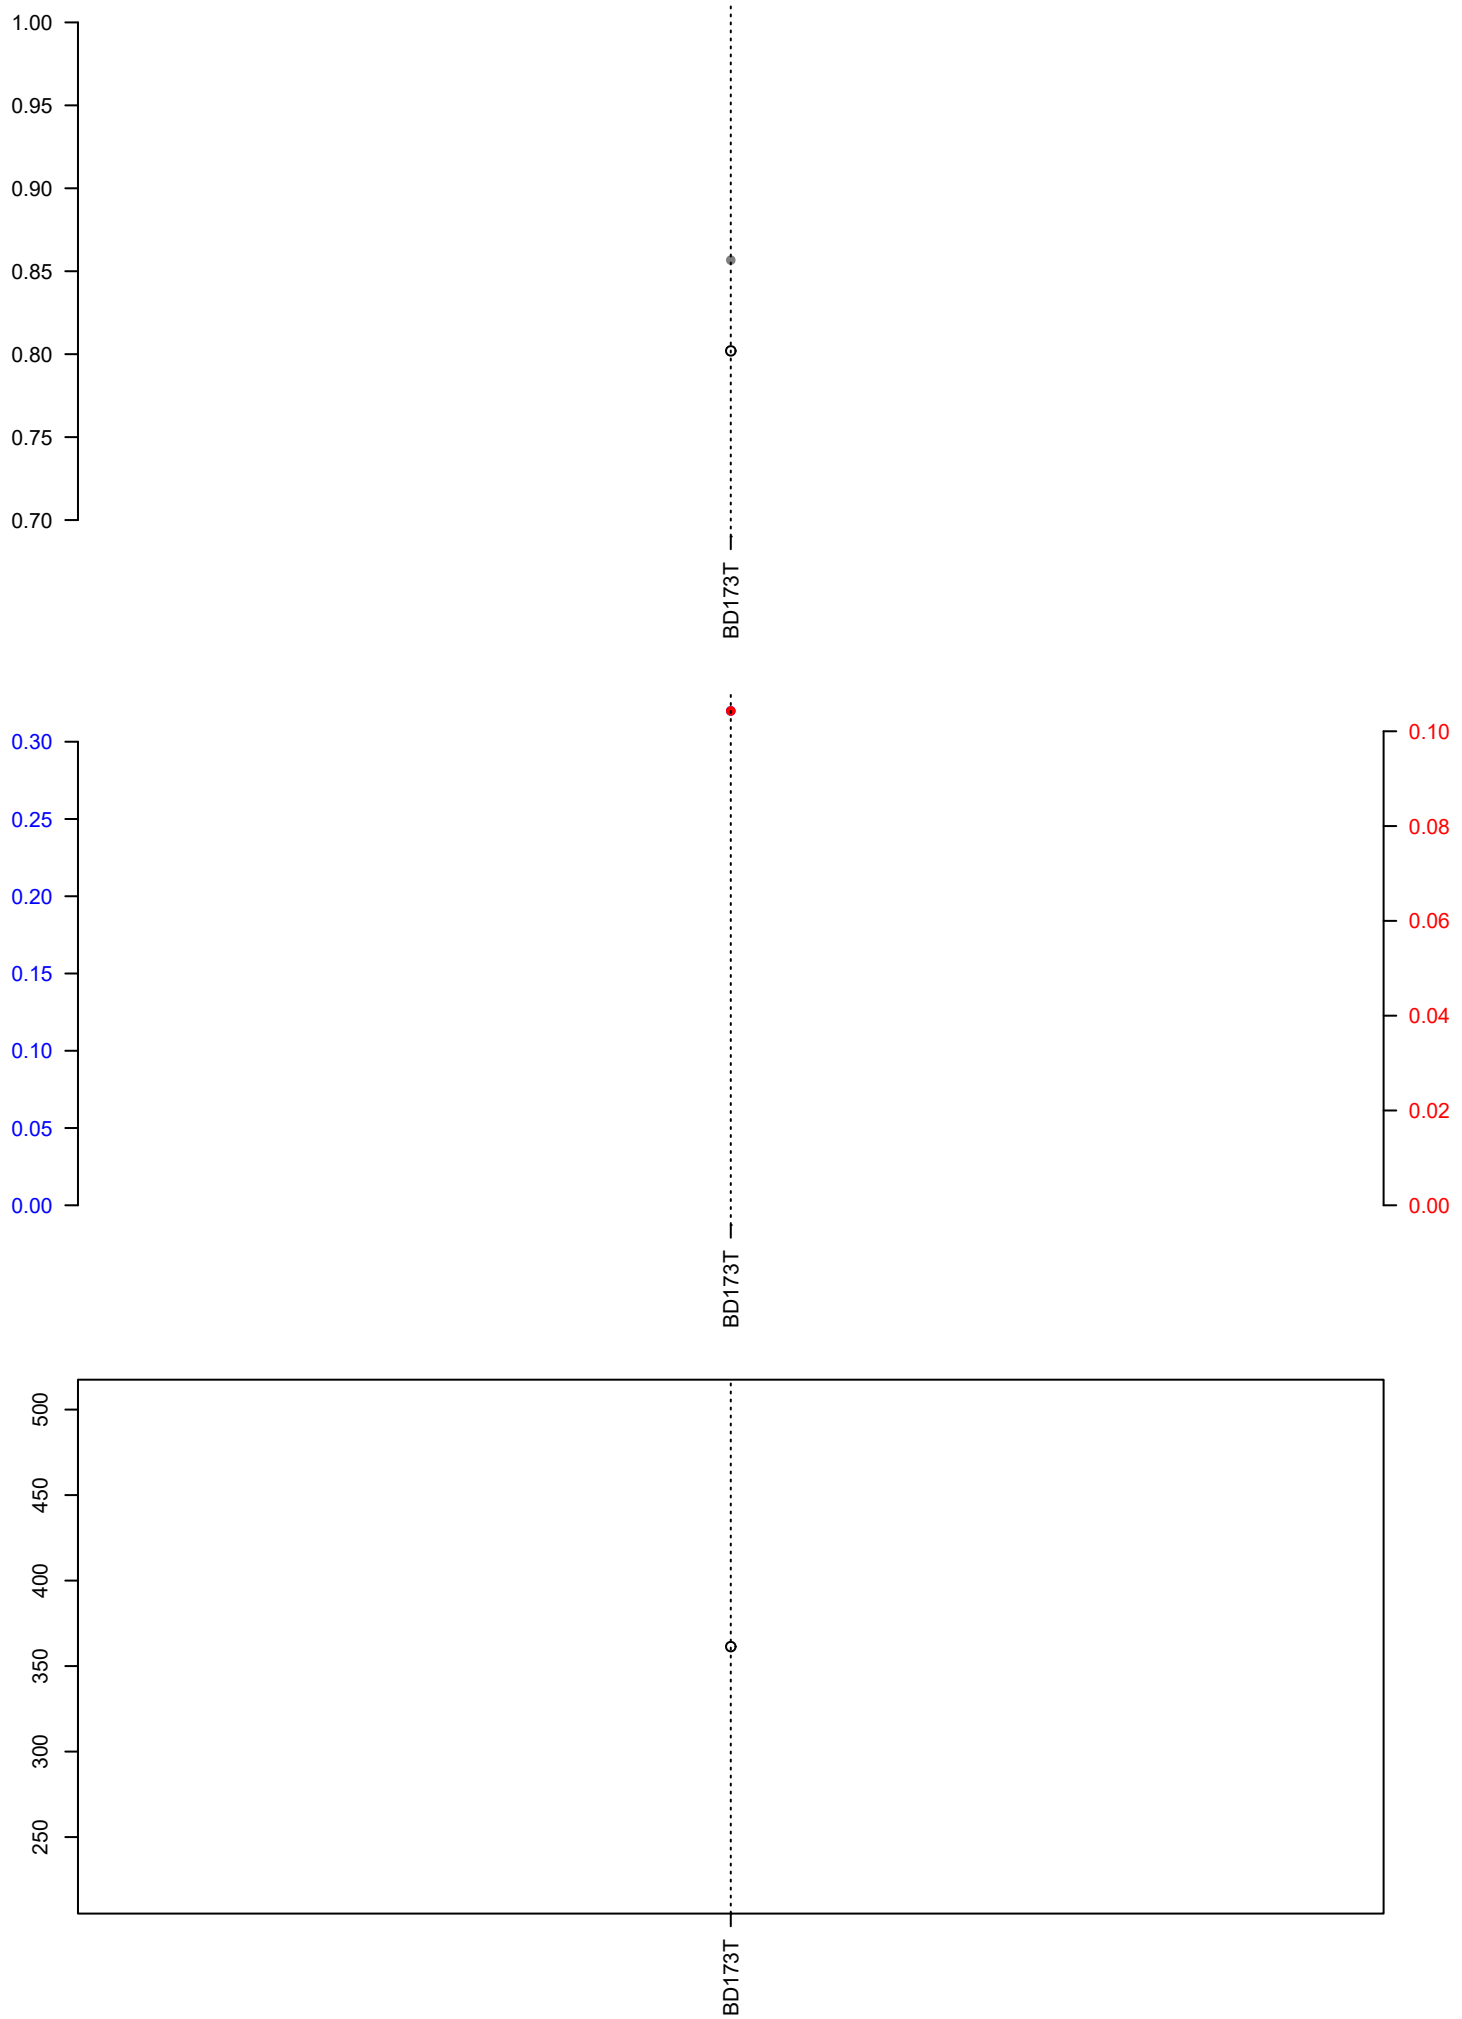

Supplement: Supplemental_Data_S2.zip [file BD173T.reconstruction.err.pdf › Supplemental_Data_S2/mSigAct_output/BD173T.reconstruction.err.pdf]

## BD182T

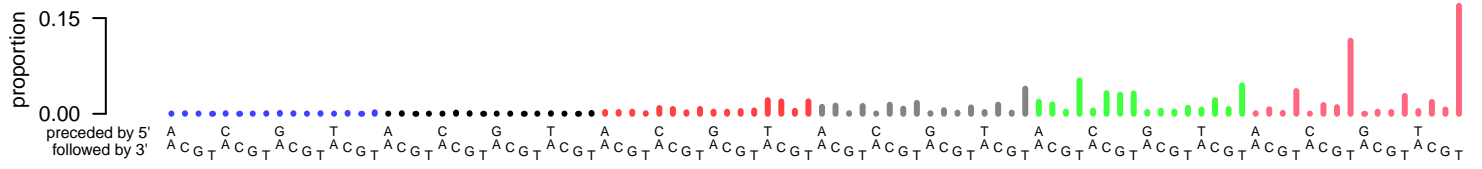

Supplement: Supplemental_Data_S2.zip [file BD182T.check.with.sig.pdf › Supplemental_Data_S2/mSigAct_output/BD182T.check.with.sig.pdf]

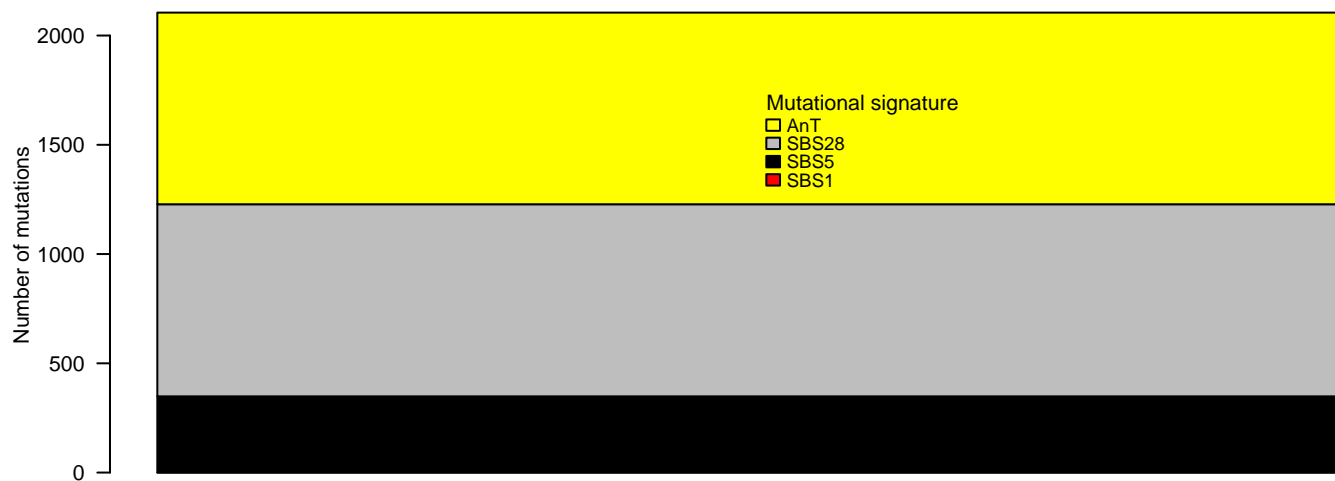

Supplement: Supplemental_Data_S2.zip [file BD182T.exposures.pdf › Supplemental_Data_S2/mSigAct_output/BD182T.exposures.pdf]

Reconstruction error

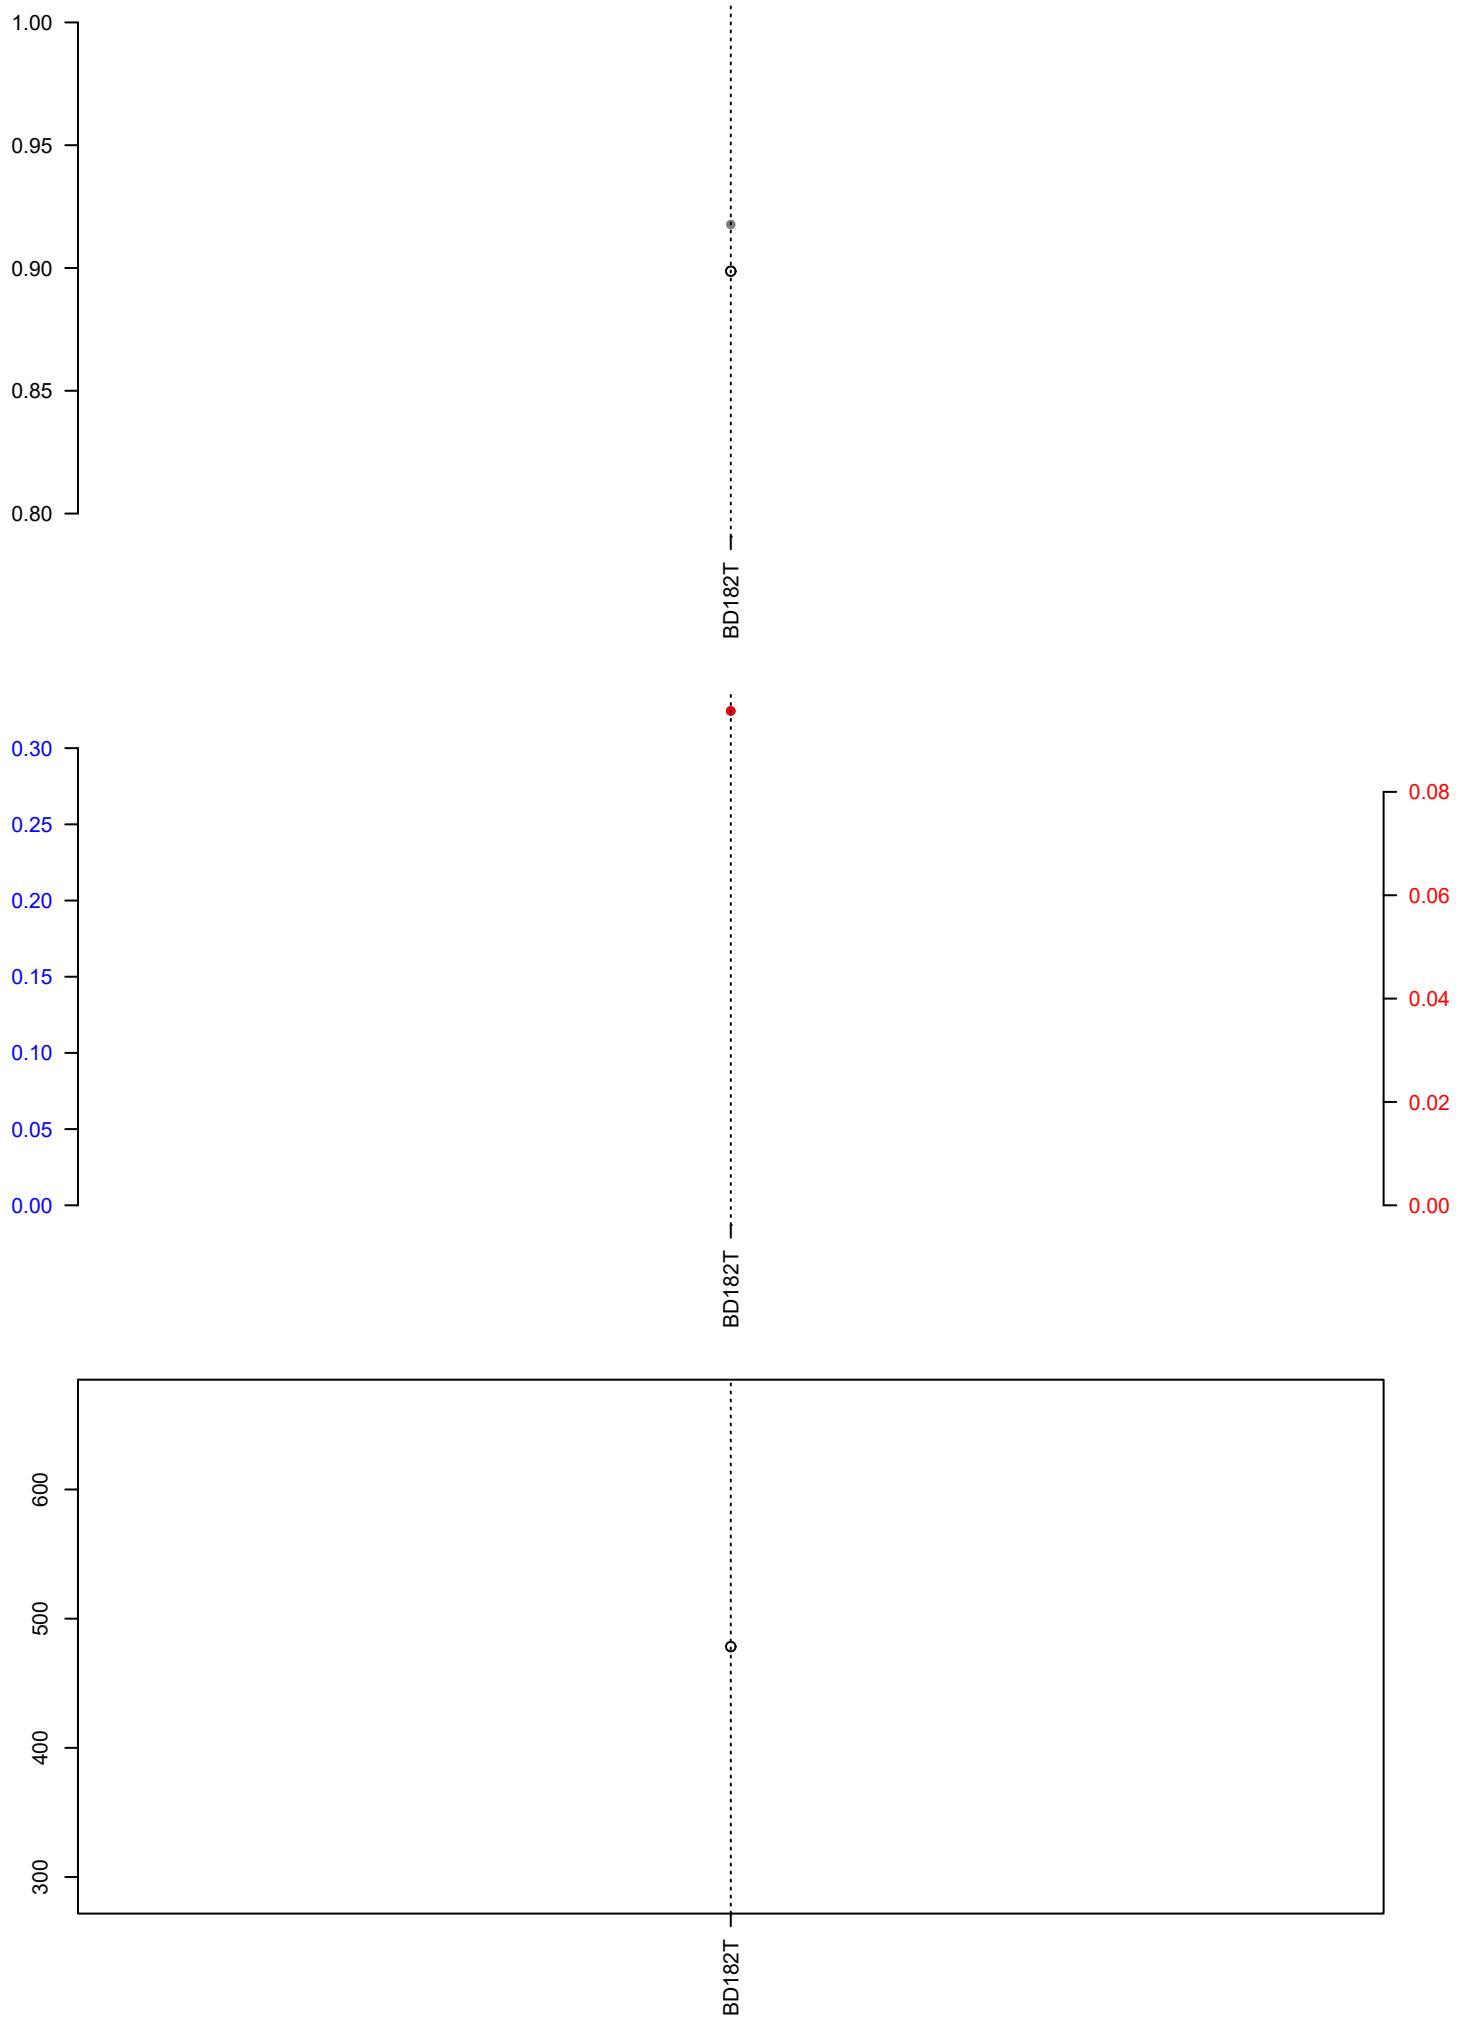

Supplement: Supplemental_Data_S2.zip [file BD182T.reconstruction.err.pdf › Supplemental_Data_S2/mSigAct_output/BD182T.reconstruction.err.pdf]

## BD223T

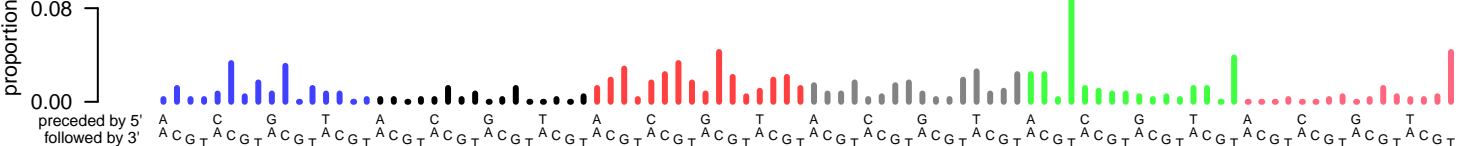

Supplement: Supplemental_Data_S2.zip [file BD223T.check.with.sig.pdf › Supplemental_Data_S2/mSigAct_output/BD223T.check.with.sig.pdf]

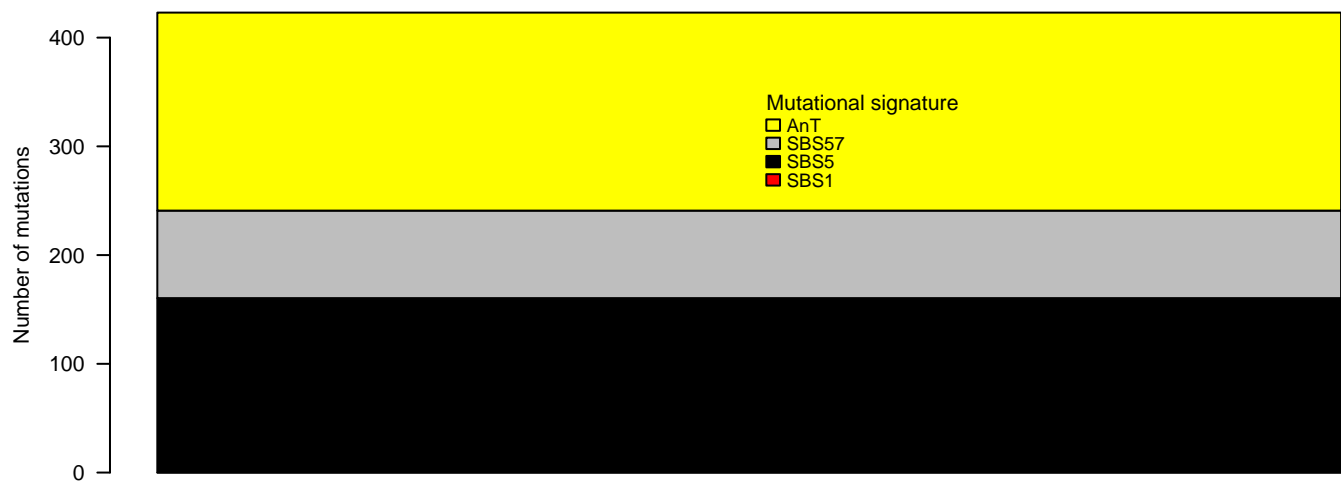

Supplement: Supplemental_Data_S2.zip [file BD223T.exposures.pdf › Supplemental_Data_S2/mSigAct_output/BD223T.exposures.pdf]

**Histogram of out.pvals**



Supplement: Supplemental_Data_S2.zip [file BD223T.pval.histogram.pdf › Supplemental_Data_S2/mSigAct_output/BD223T.pval.histogram.pdf]

Reconstruction error

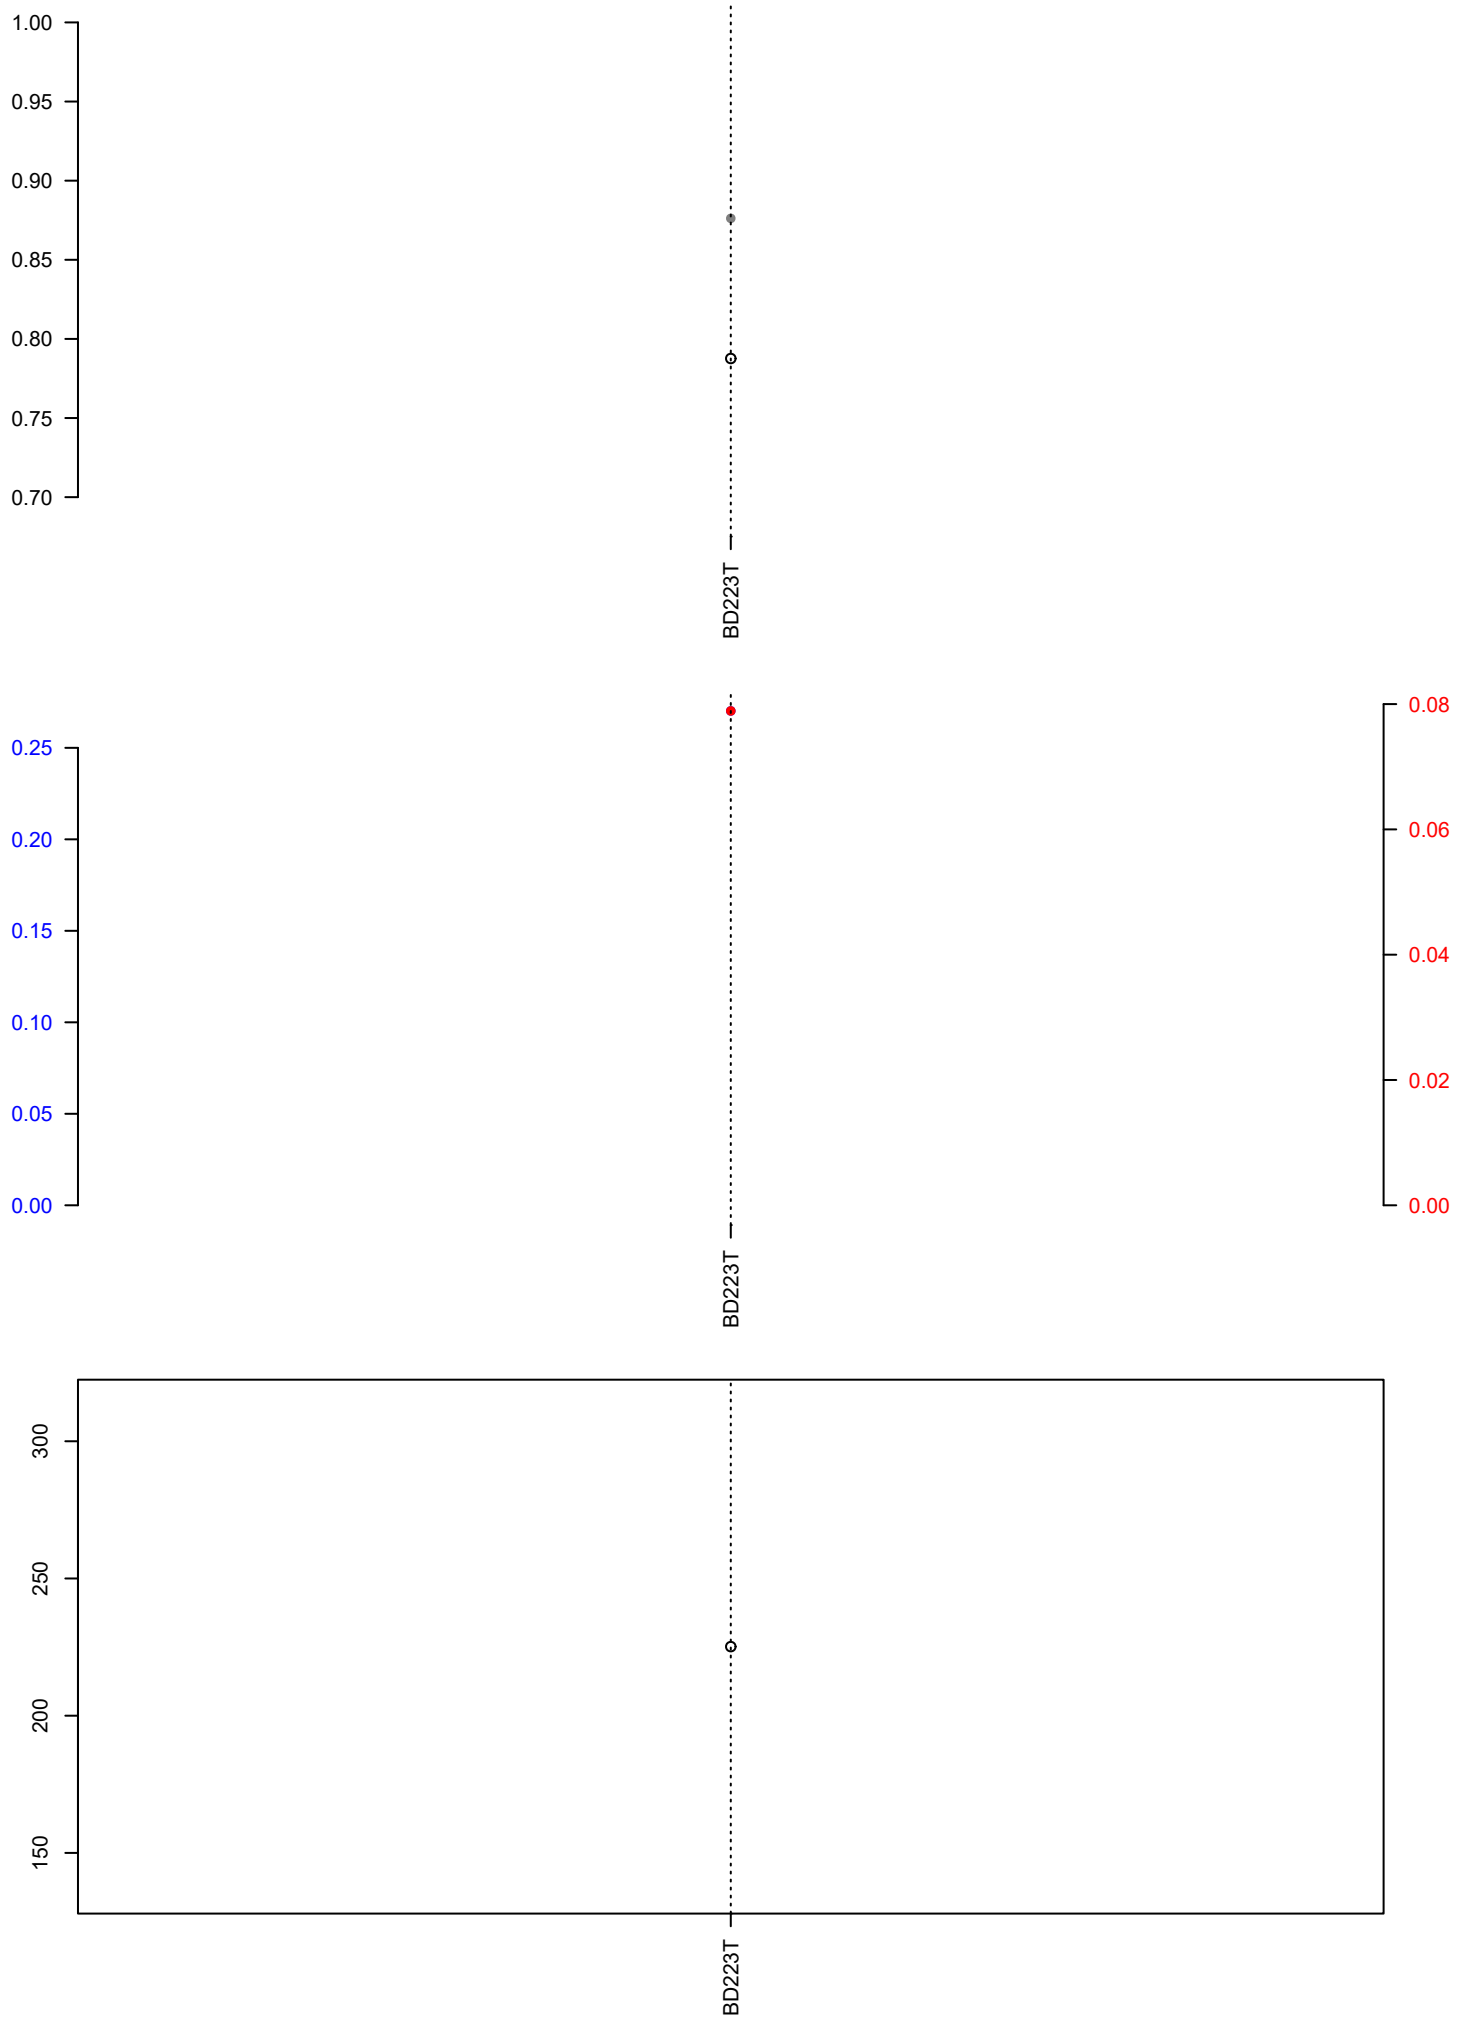

Supplement: Supplemental_Data_S2.zip [file BD223T.reconstruction.err.pdf › Supplemental_Data_S2/mSigAct_output/BD223T.reconstruction.err.pdf]

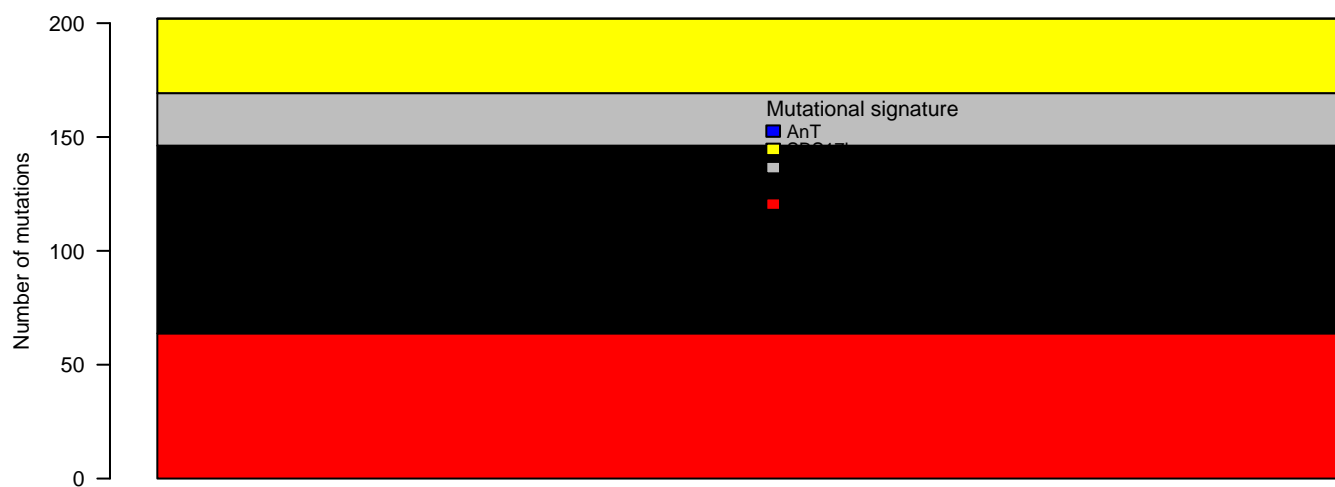

Supplement: Supplemental_Data_S2.zip [file ESO-173.exposures.pdf › Supplemental_Data_S2/mSigAct_output/ESO-173.exposures.pdf]

**Histogram of out.pvals**

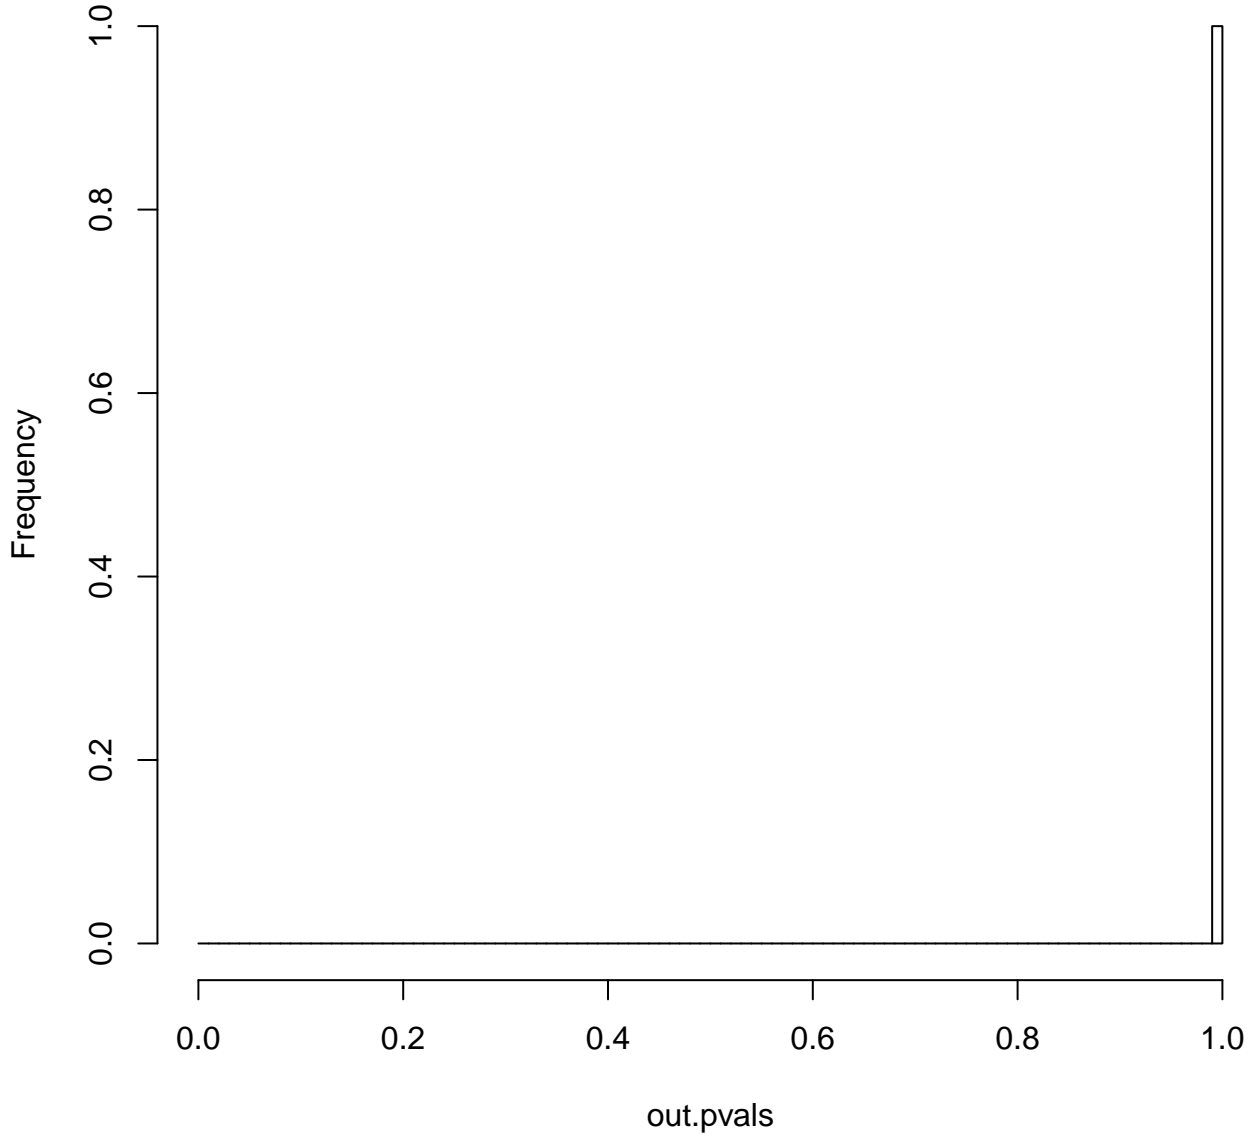

Supplement: Supplemental_Data_S2.zip [file ESO-173.pval.histogram.pdf › Supplemental_Data_S2/mSigAct_output/ESO-173.pval.histogram.pdf]

Reconstruction error

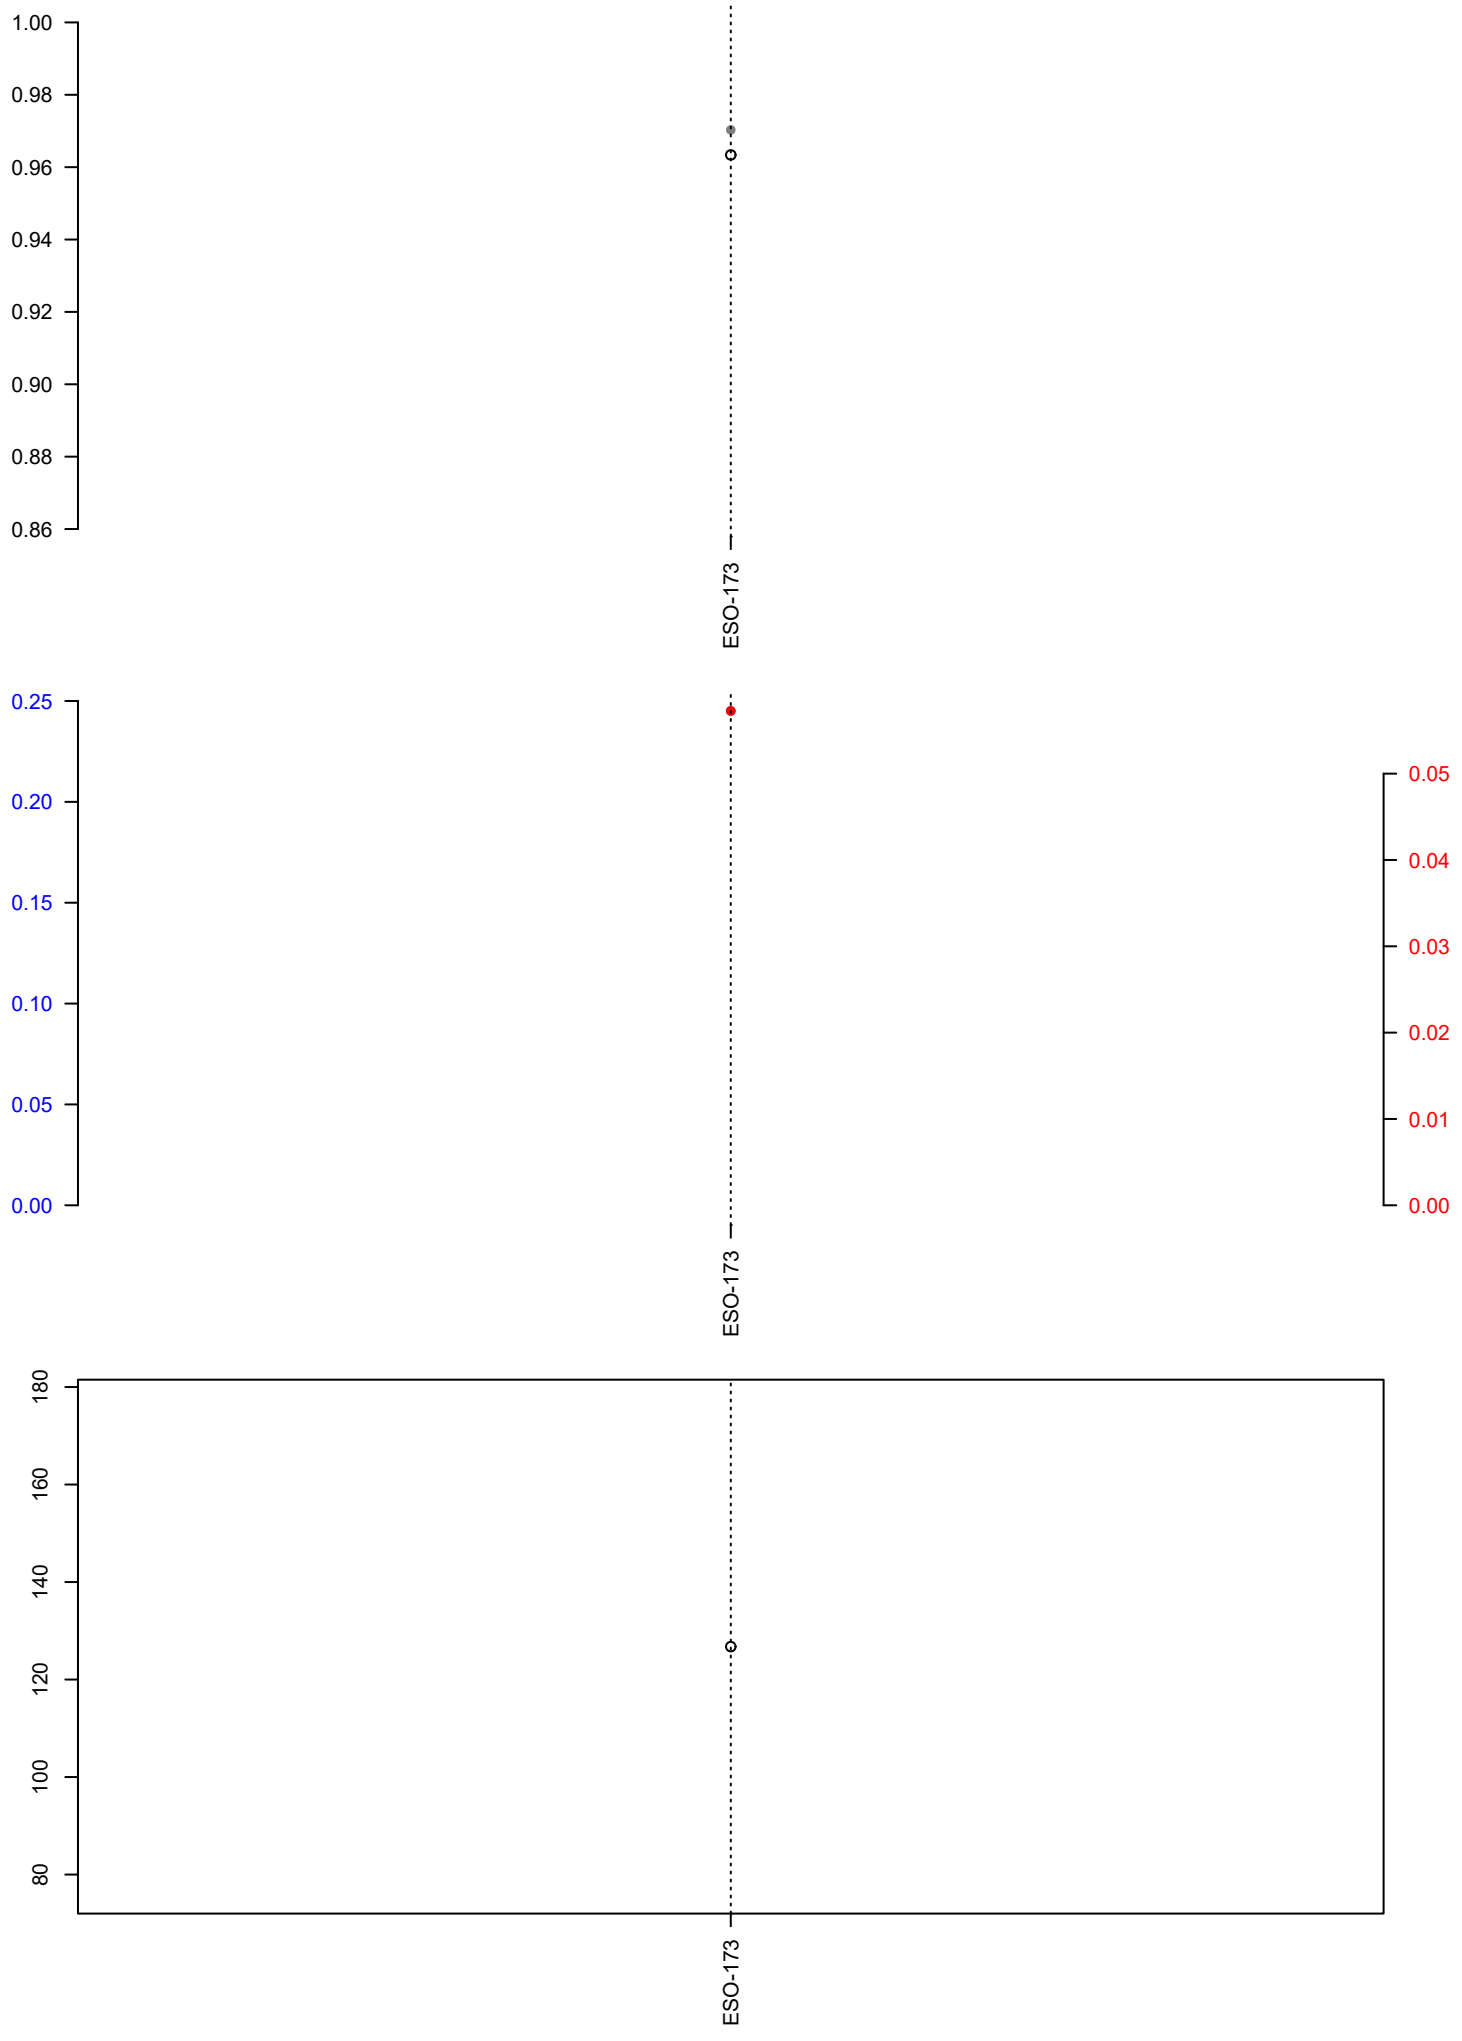

Supplement: Supplemental_Data_S2.zip [file ESO-173.reconstruction.err.pdf › Supplemental_Data_S2/mSigAct_output/ESO-173.reconstruction.err.pdf]

Number of mutations

200  
150  
100  
50  
0

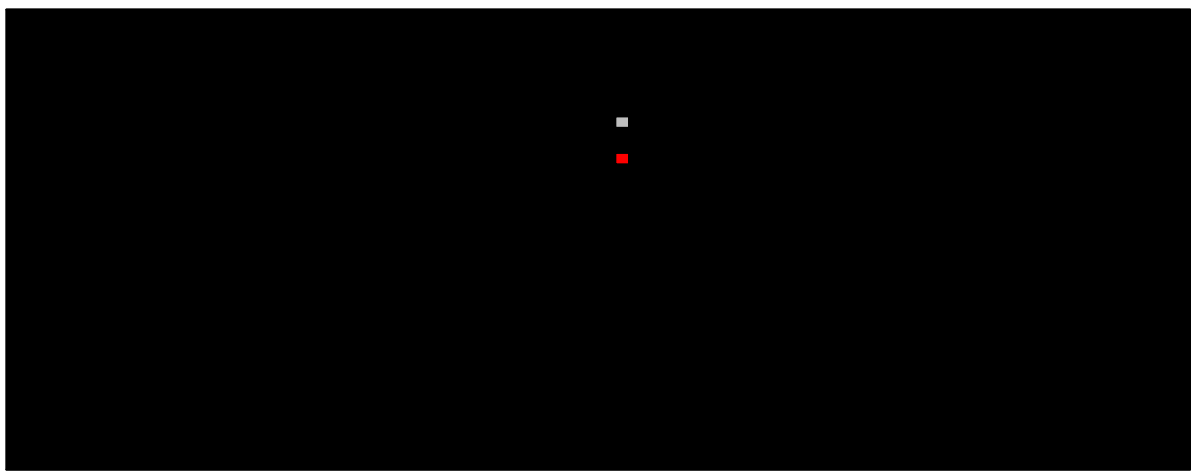

Supplement: Supplemental_Data_S2.zip [file HCC34T.exposures.pdf › Supplemental_Data_S2/mSigAct_output/HCC34T.exposures.pdf]

**Histogram of out.pvals**

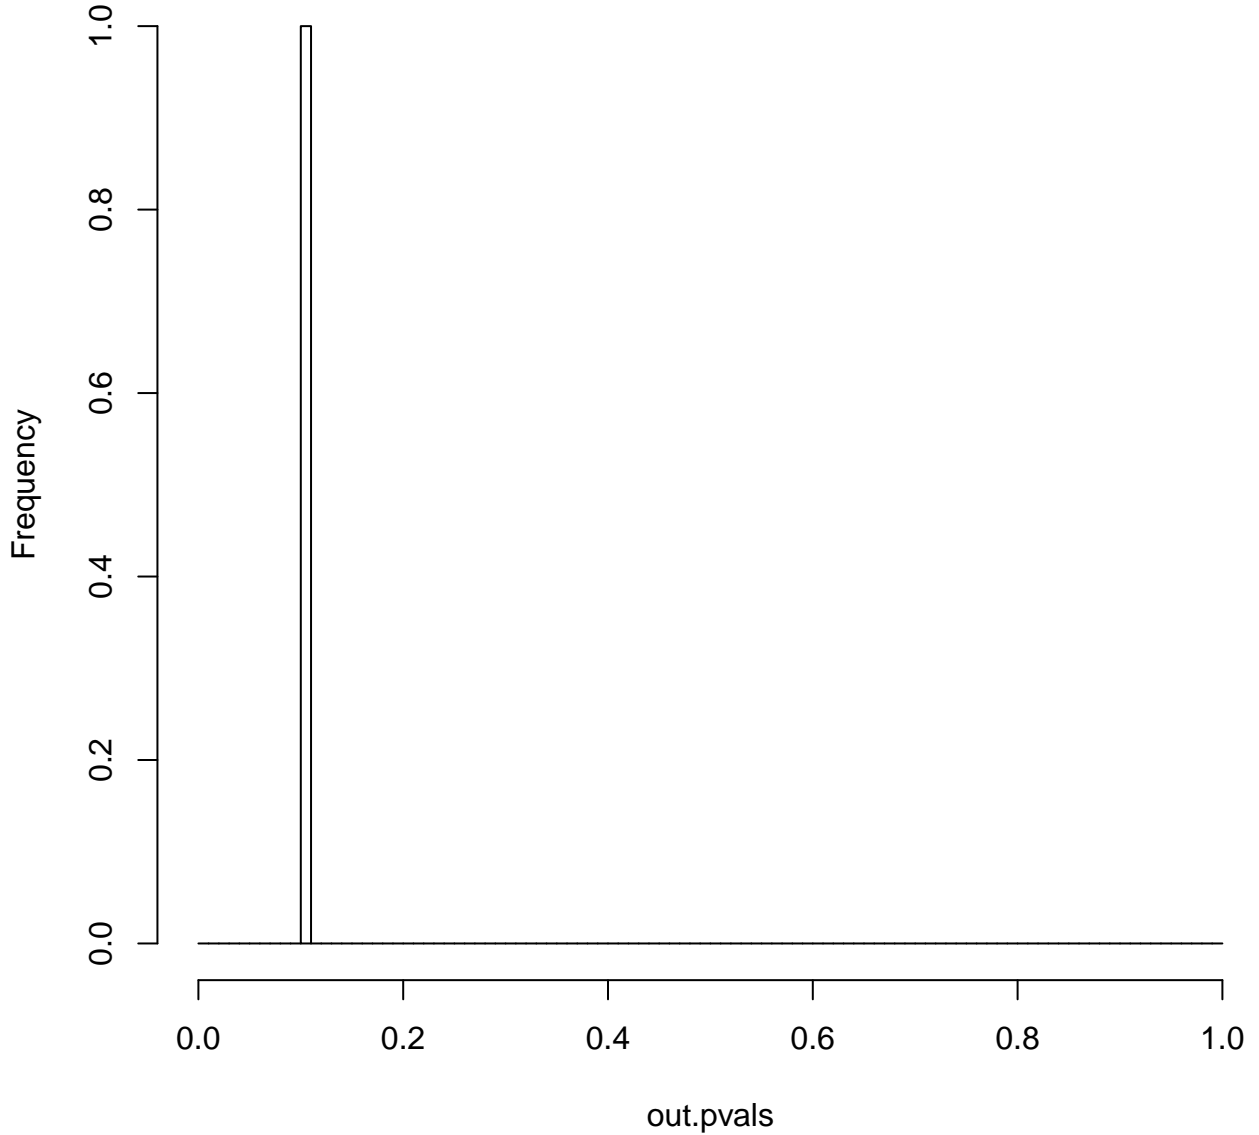

Supplement: Supplemental_Data_S2.zip [file HCC34T.pval.histogram.pdf › Supplemental_Data_S2/mSigAct_output/HCC34T.pval.histogram.pdf]

Reconstruction error

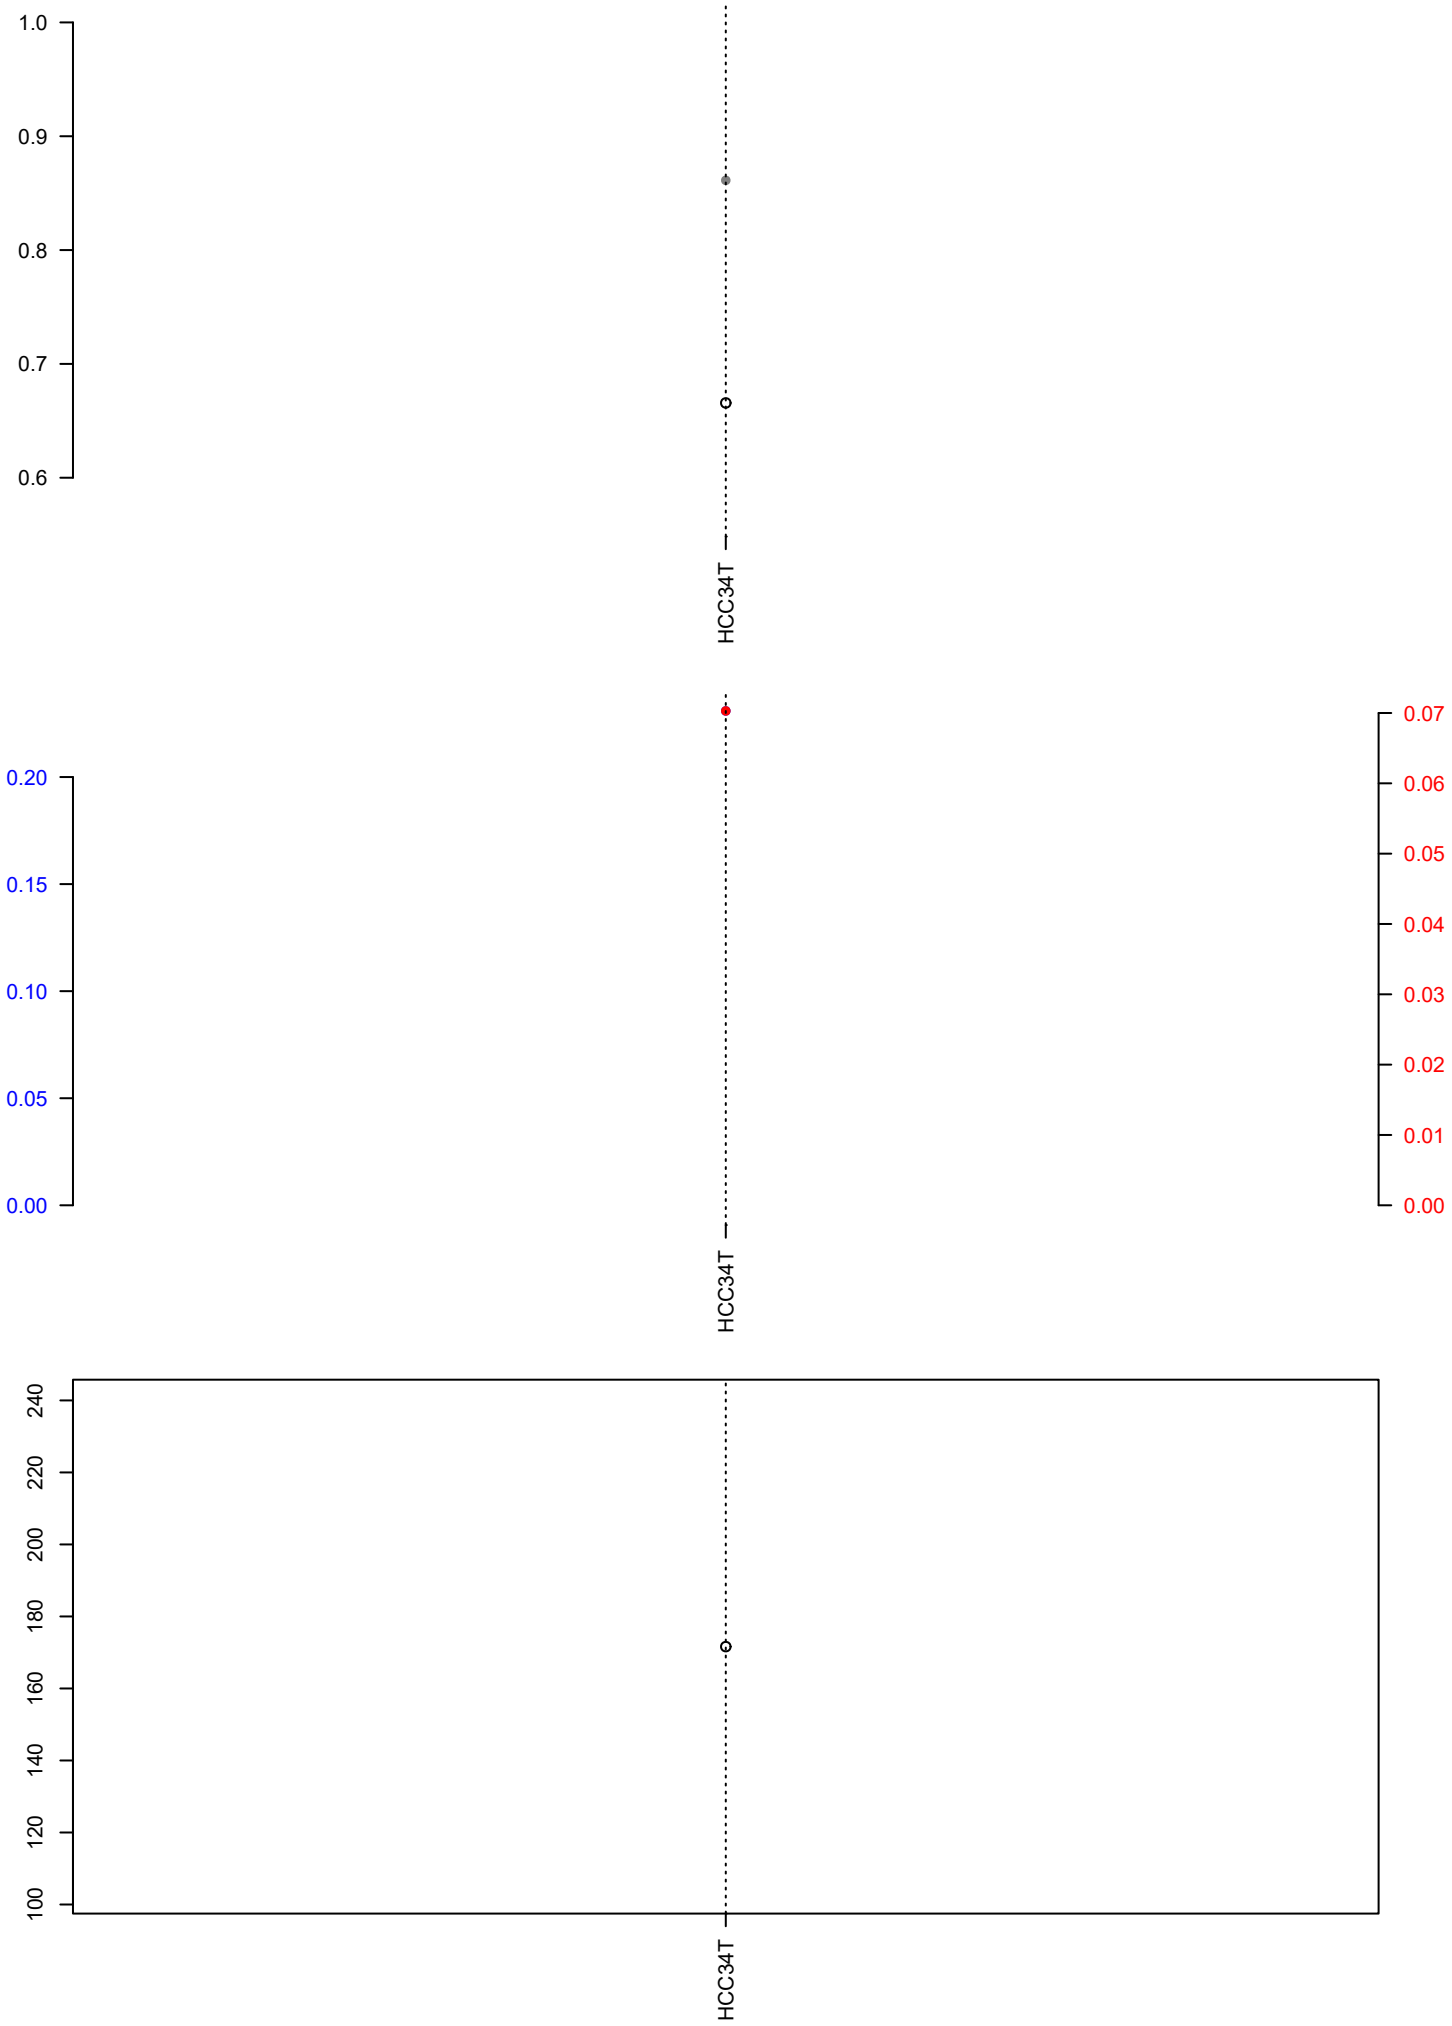

Supplement: Supplemental_Data_S2.zip [file HCC34T.reconstruction.err.pdf › Supplemental_Data_S2/mSigAct_output/HCC34T.reconstruction.err.pdf]

LP6005935.DNA\_B03

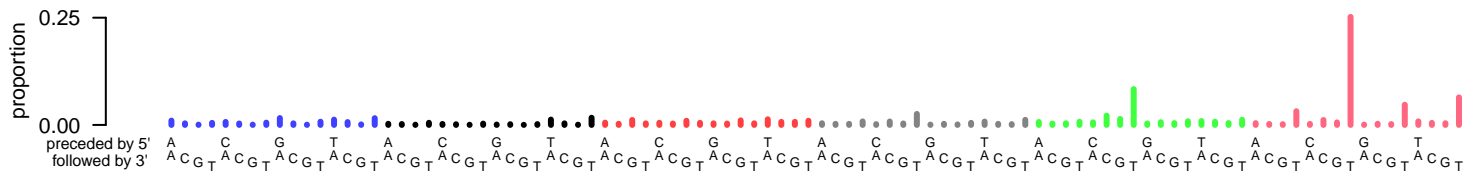

Supplement: Supplemental_Data_S2.zip [file LP6005935-DNA_B03.check.with.sig.pdf › Supplemental_Data_S2/mSigAct_output/LP6005935-DNA_B03.check.with.sig.pdf]

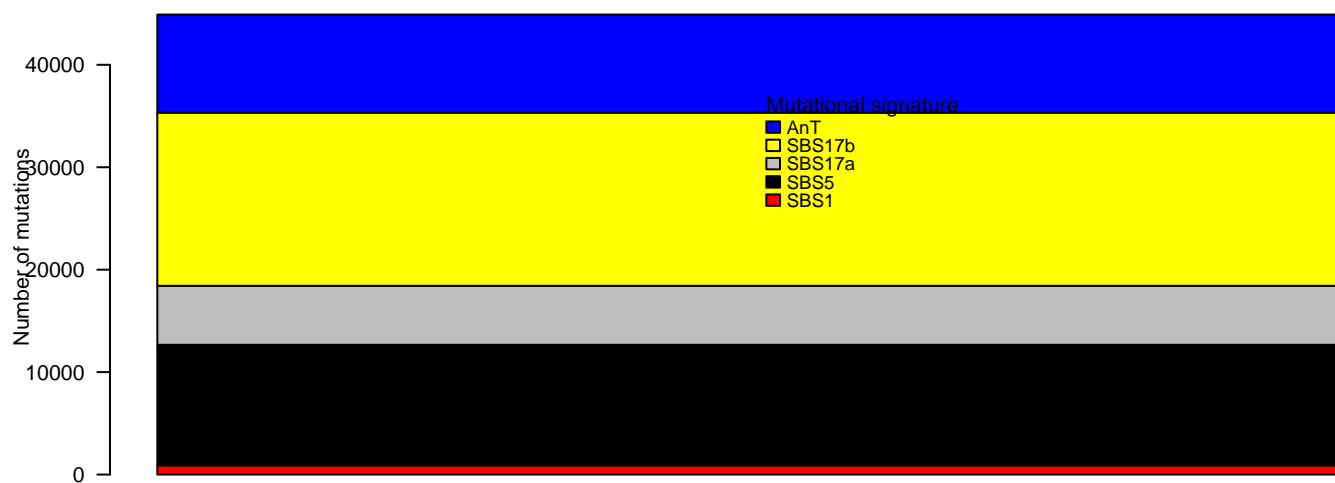

Supplement: Supplemental_Data_S2.zip [file LP6005935-DNA_B03.exposures.pdf › Supplemental_Data_S2/mSigAct_output/LP6005935-DNA_B03.exposures.pdf]

**Histogram of out.pvals**



Supplement: Supplemental_Data_S2.zip [file LP6005935-DNA_B03.pval.histogram.pdf › Supplemental_Data_S2/mSigAct_output/LP6005935-DNA_B03.pval.histogram.pdf]

Reconstruction error

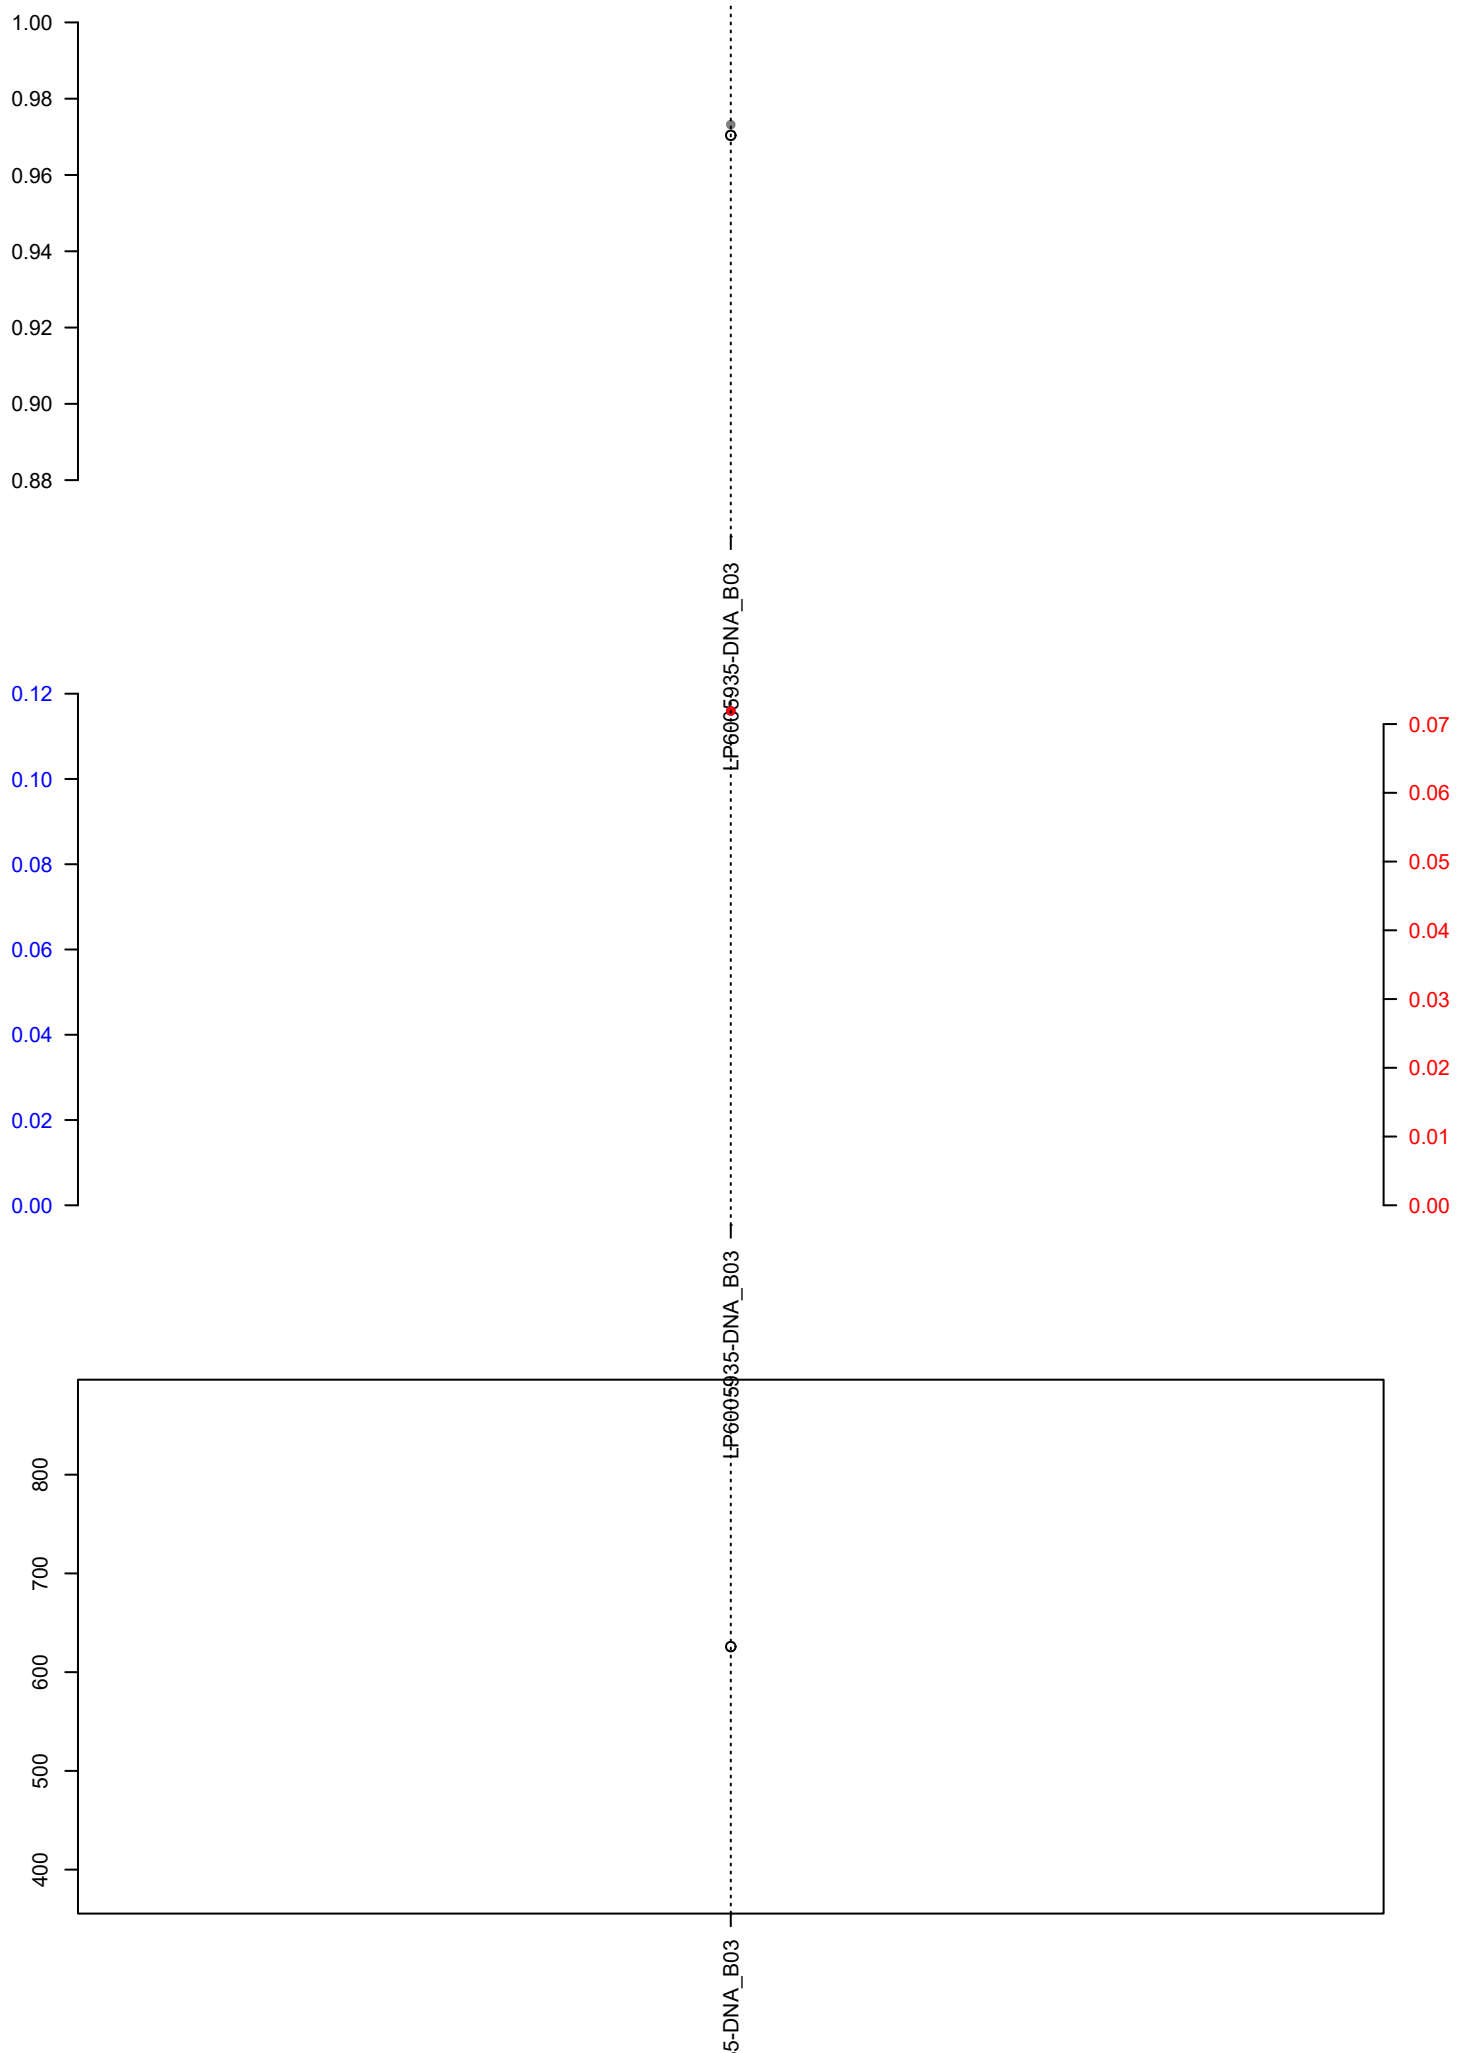

Supplement: Supplemental_Data_S2.zip [file LP6005935-DNA_B03.reconstruction.err.pdf › Supplemental_Data_S2/mSigAct_output/LP6005935-DNA_B03.reconstruction.err.pdf]

# PCSI\_0060\_Pa\_X

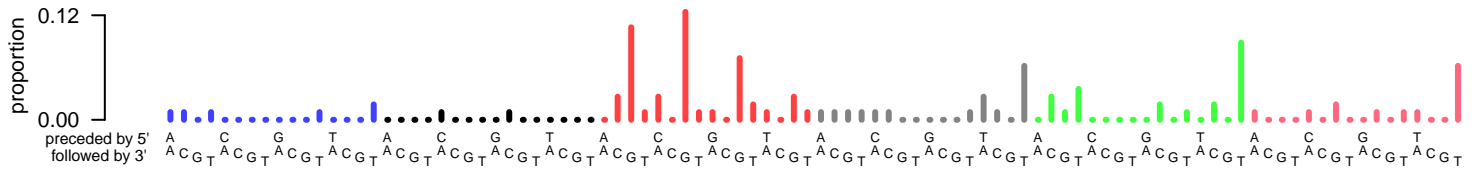

Supplement: Supplemental_Data_S2.zip [file PCSI_0060_Pa_X.check.with.sig.pdf › Supplemental_Data_S2/mSigAct_output/PCSI_0060_Pa_X.check.with.sig.pdf]

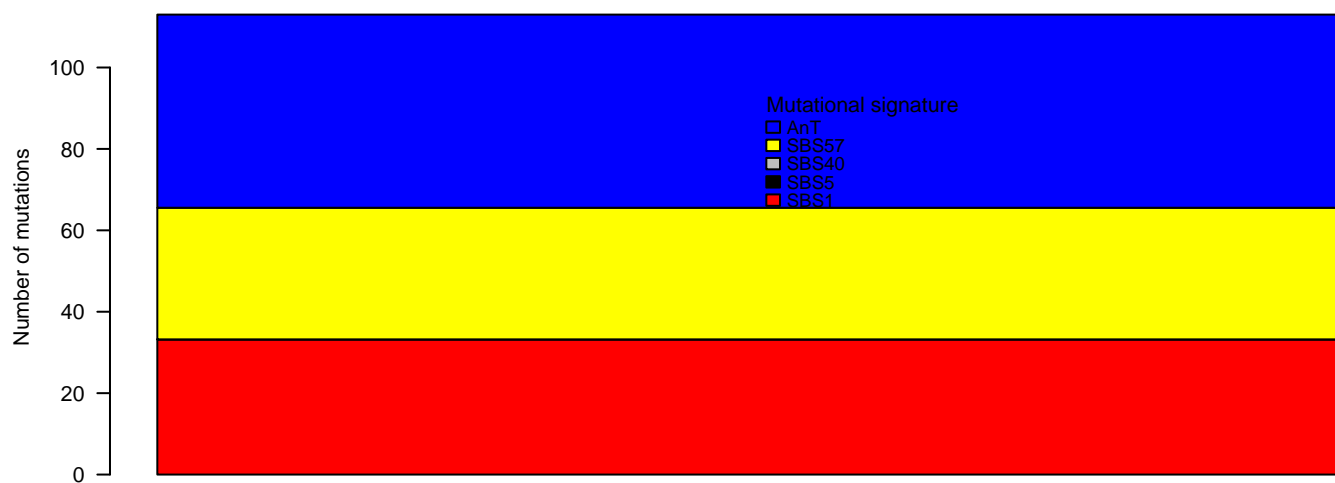

Supplement: Supplemental_Data_S2.zip [file PCSI_0060_Pa_X.exposures.pdf › Supplemental_Data_S2/mSigAct_output/PCSI_0060_Pa_X.exposures.pdf]

**Histogram of out.pvals**



Supplement: Supplemental_Data_S2.zip [file PCSI_0060_Pa_X.pval.histogram.pdf › Supplemental_Data_S2/mSigAct_output/PCSI_0060_Pa_X.pval.histogram.pdf]

Reconstruction error

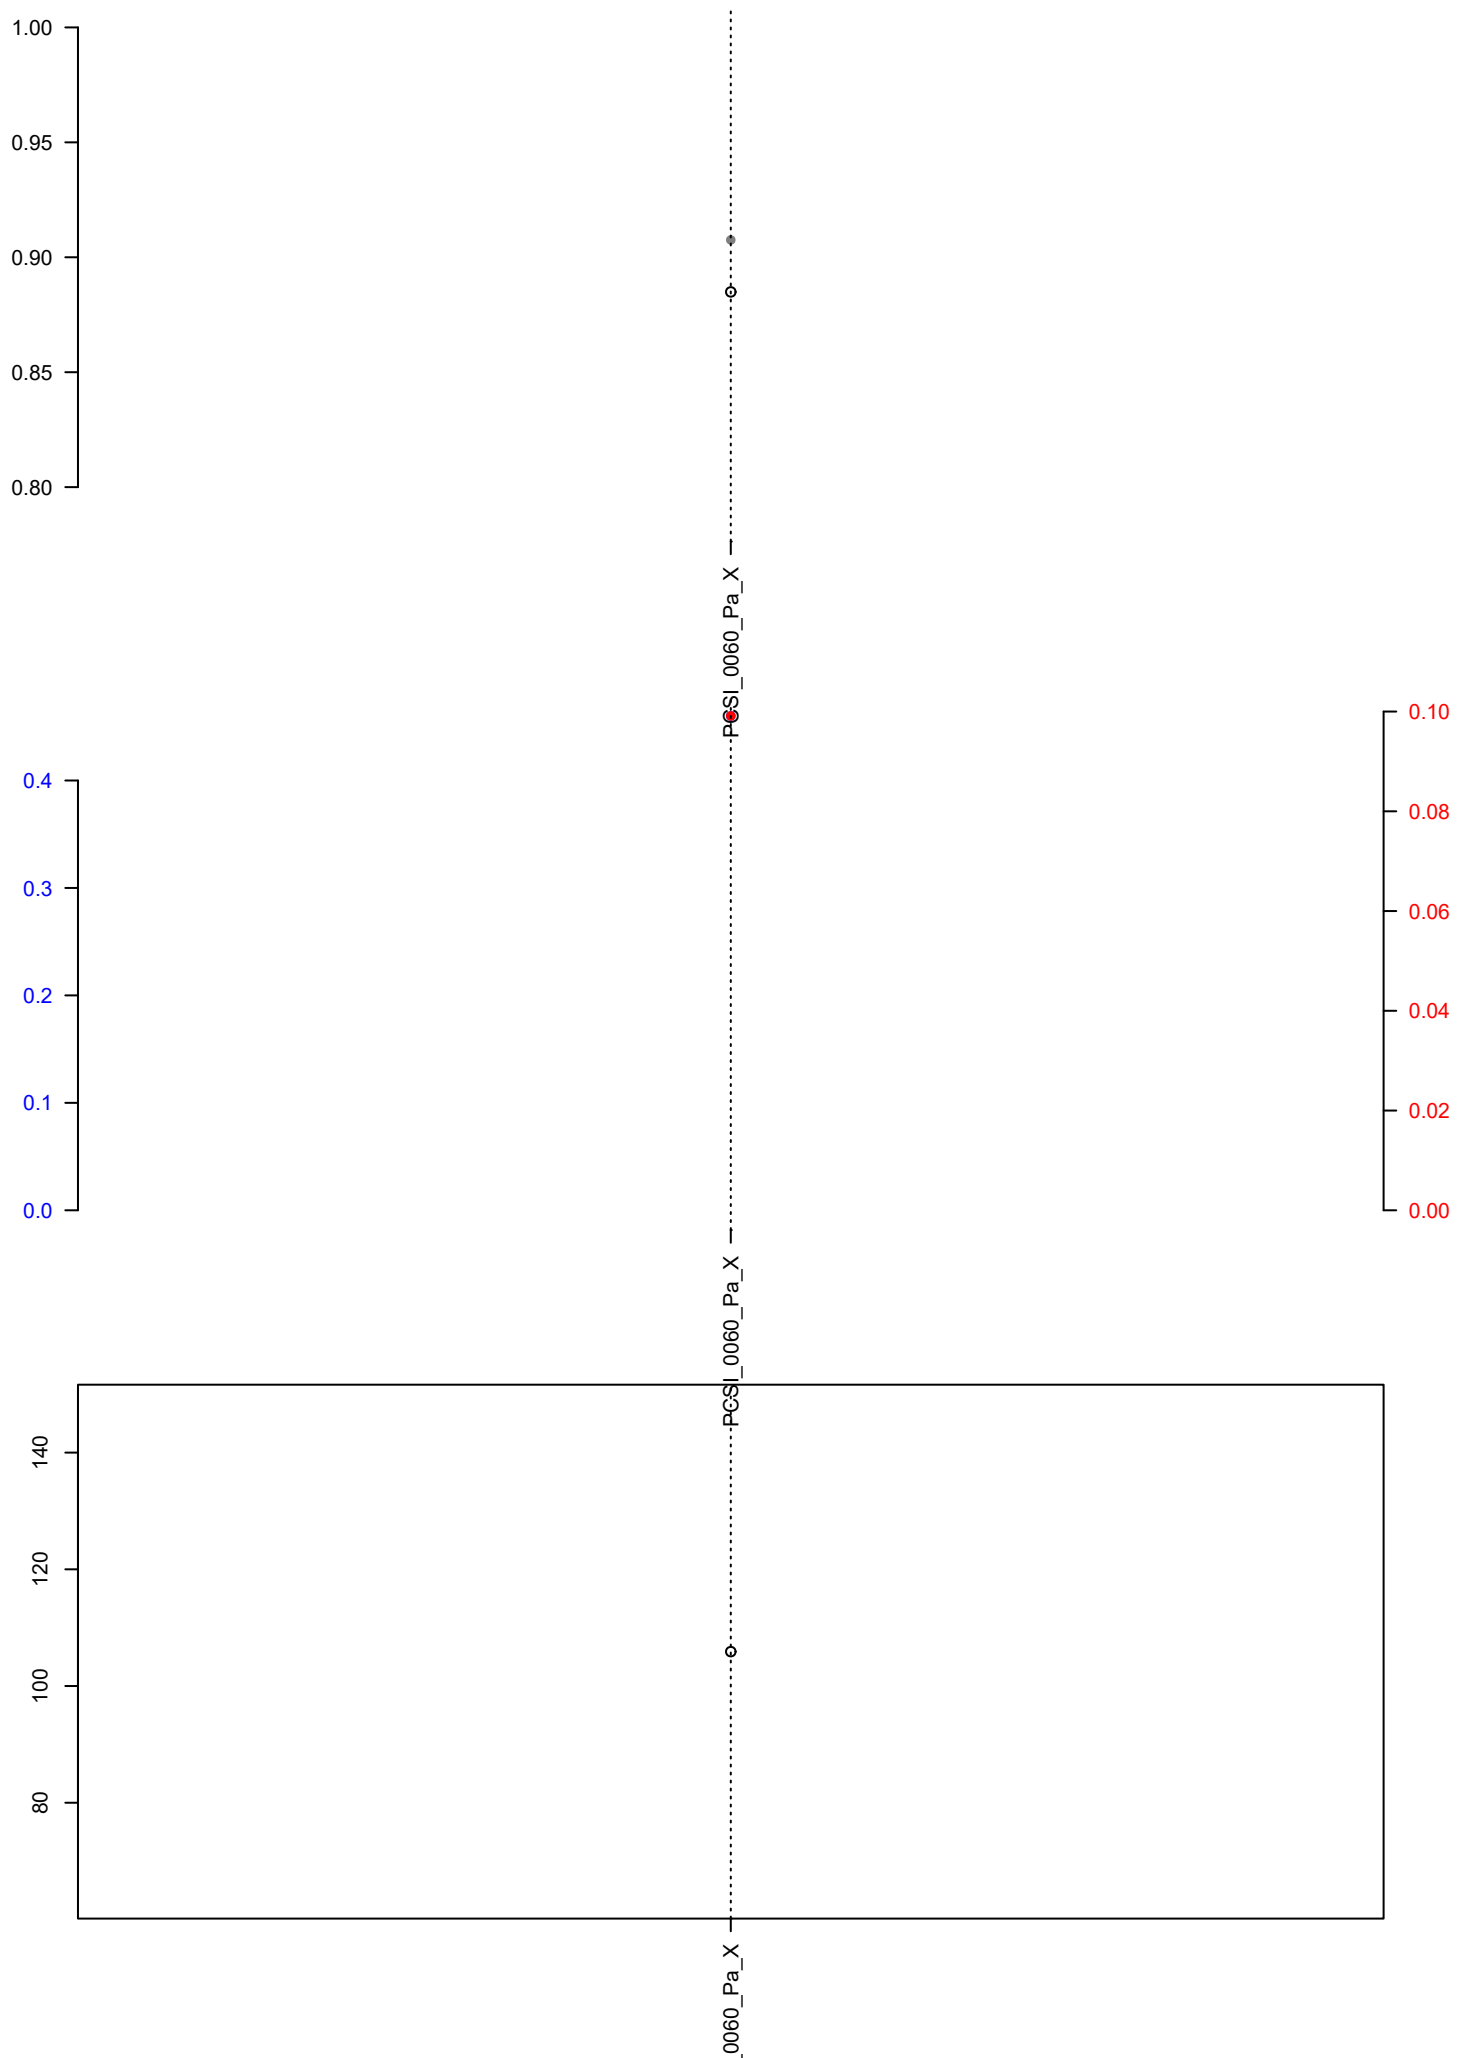

Supplement: Supplemental_Data_S2.zip [file PCSI_0060_Pa_X.reconstruction.err.pdf › Supplemental_Data_S2/mSigAct_output/PCSI_0060_Pa_X.reconstruction.err.pdf]

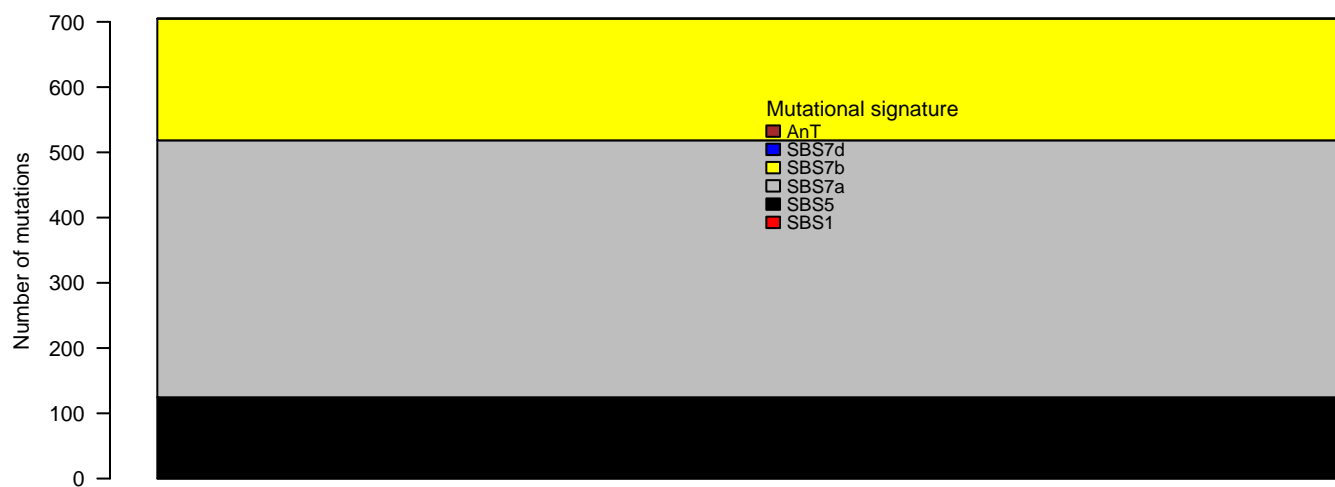

Supplement: Supplemental_Data_S2.zip [file SKCM-JWCI-WGS-8-Tumor.exposures.pdf › Supplemental_Data_S2/mSigAct_output/SKCM-JWCI-WGS-8-Tumor.exposures.pdf]

**Histogram of out.pvals**

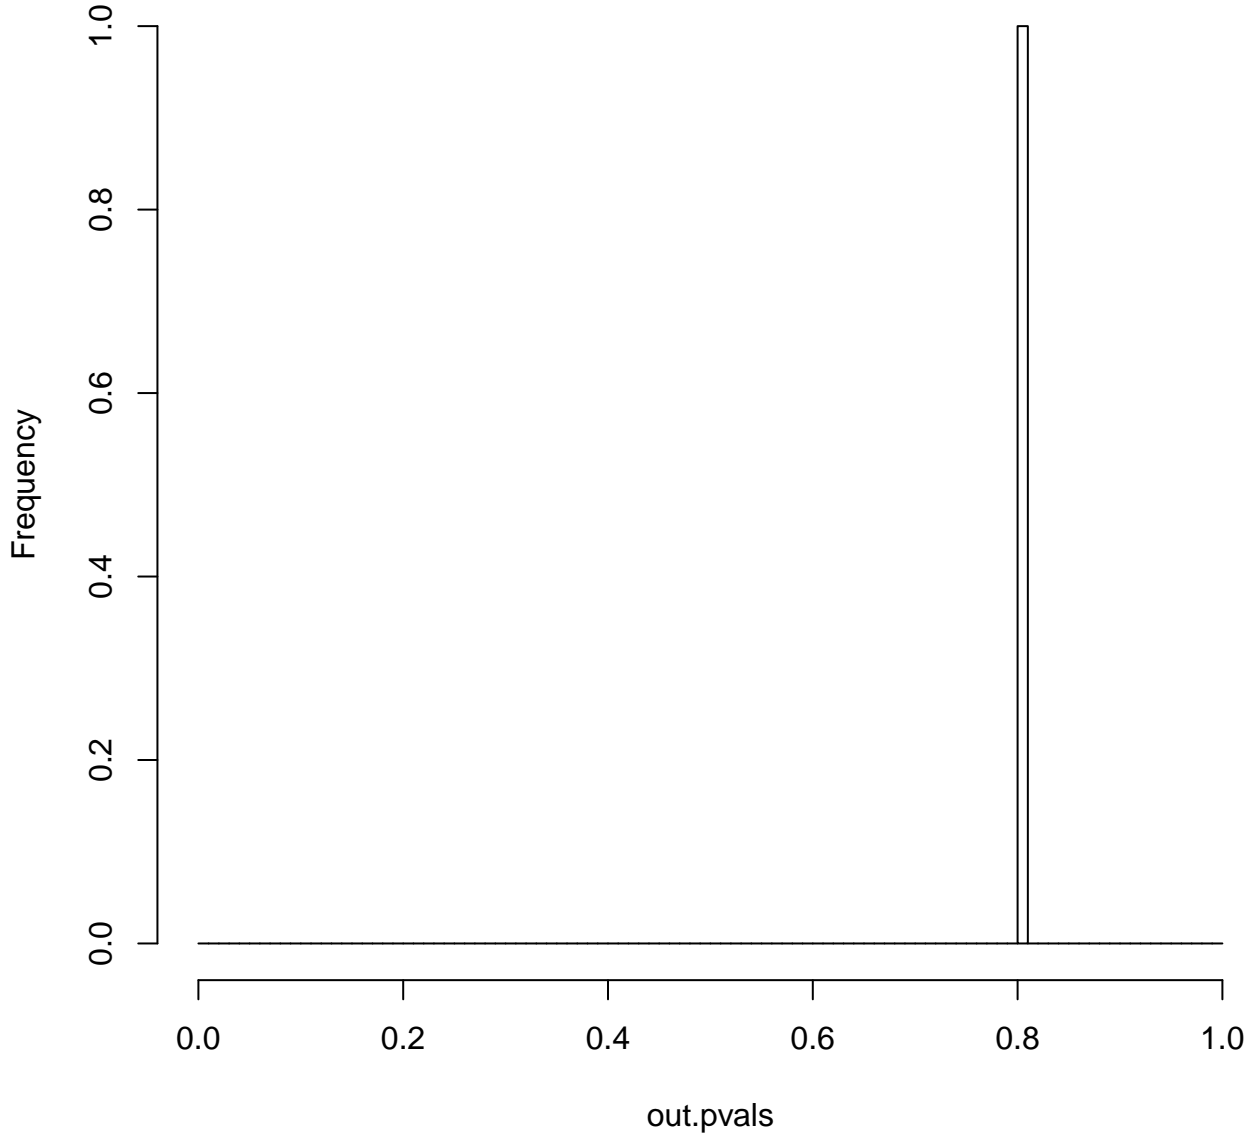

Supplement: Supplemental_Data_S2.zip [file SKCM-JWCI-WGS-8-Tumor.pval.histogram.pdf › Supplemental_Data_S2/mSigAct_output/SKCM-JWCI-WGS-8-Tumor.pval.histogram.pdf]

Reconstruction error

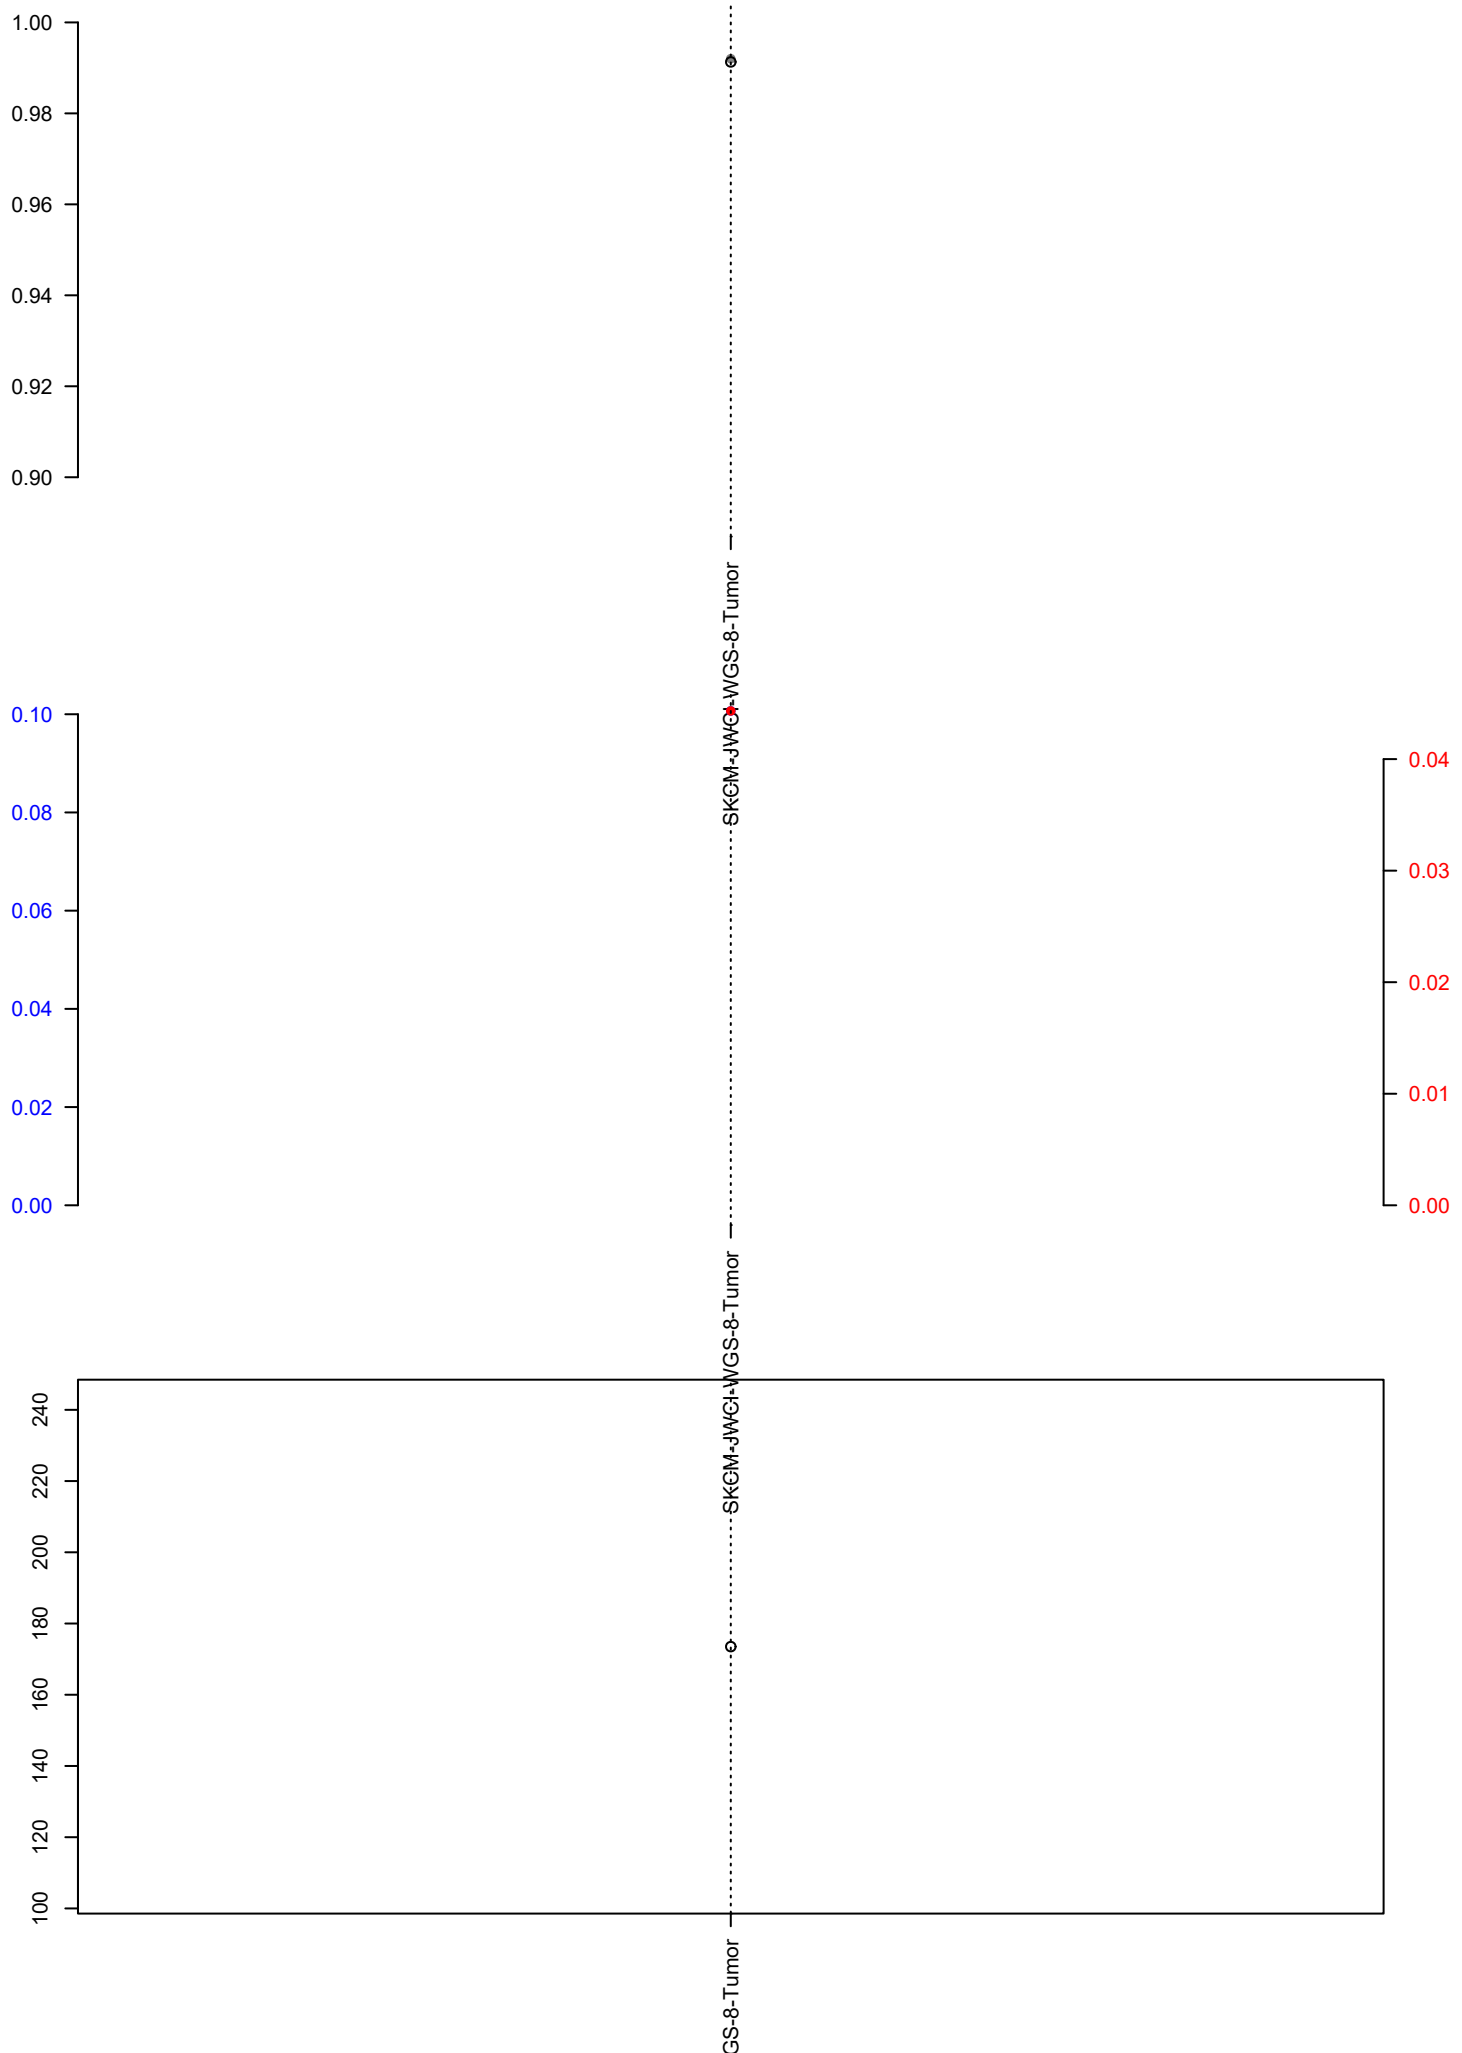

Supplement: Supplemental_Data_S2.zip [file SKCM-JWCI-WGS-8-Tumor.reconstruction.err.pdf › Supplemental_Data_S2/mSigAct_output/SKCM-JWCI-WGS-8-Tumor.reconstruction.err.pdf]

**SP111026**

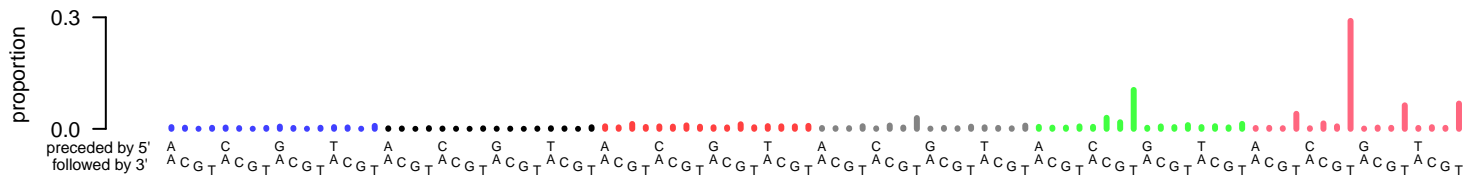

Supplement: Supplemental_Data_S2.zip [file SP111026.check.with.sig.pdf › Supplemental_Data_S2/mSigAct_output/SP111026.check.with.sig.pdf]

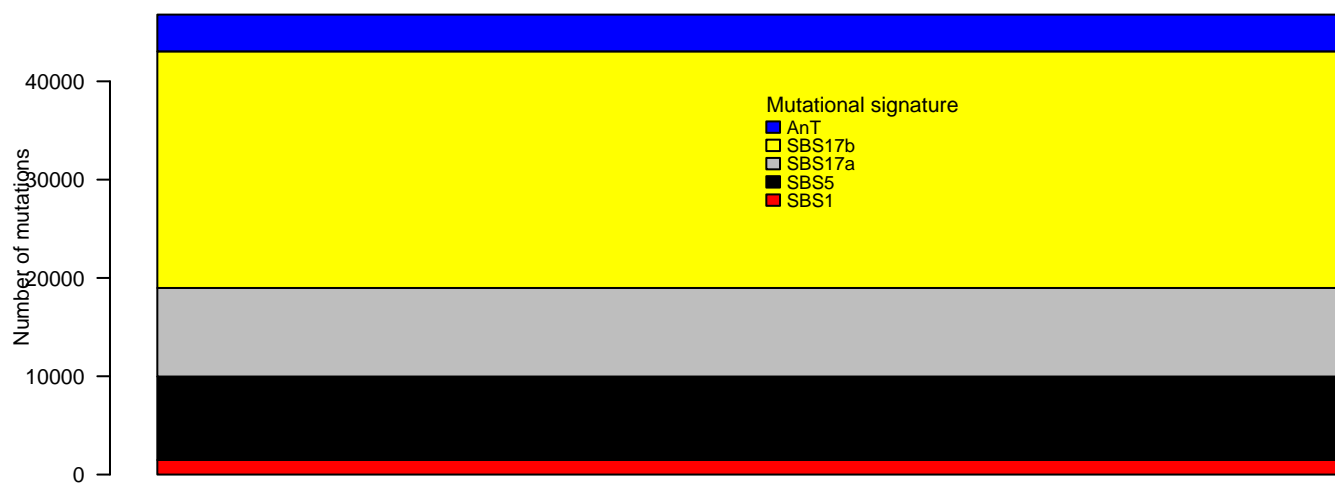

Supplement: Supplemental_Data_S2.zip [file SP111026.exposures.pdf › Supplemental_Data_S2/mSigAct_output/SP111026.exposures.pdf]

**Histogram of out.pvals**



Supplement: Supplemental_Data_S2.zip [file SP111026.pval.histogram.pdf › Supplemental_Data_S2/mSigAct_output/SP111026.pval.histogram.pdf]

Reconstruction error

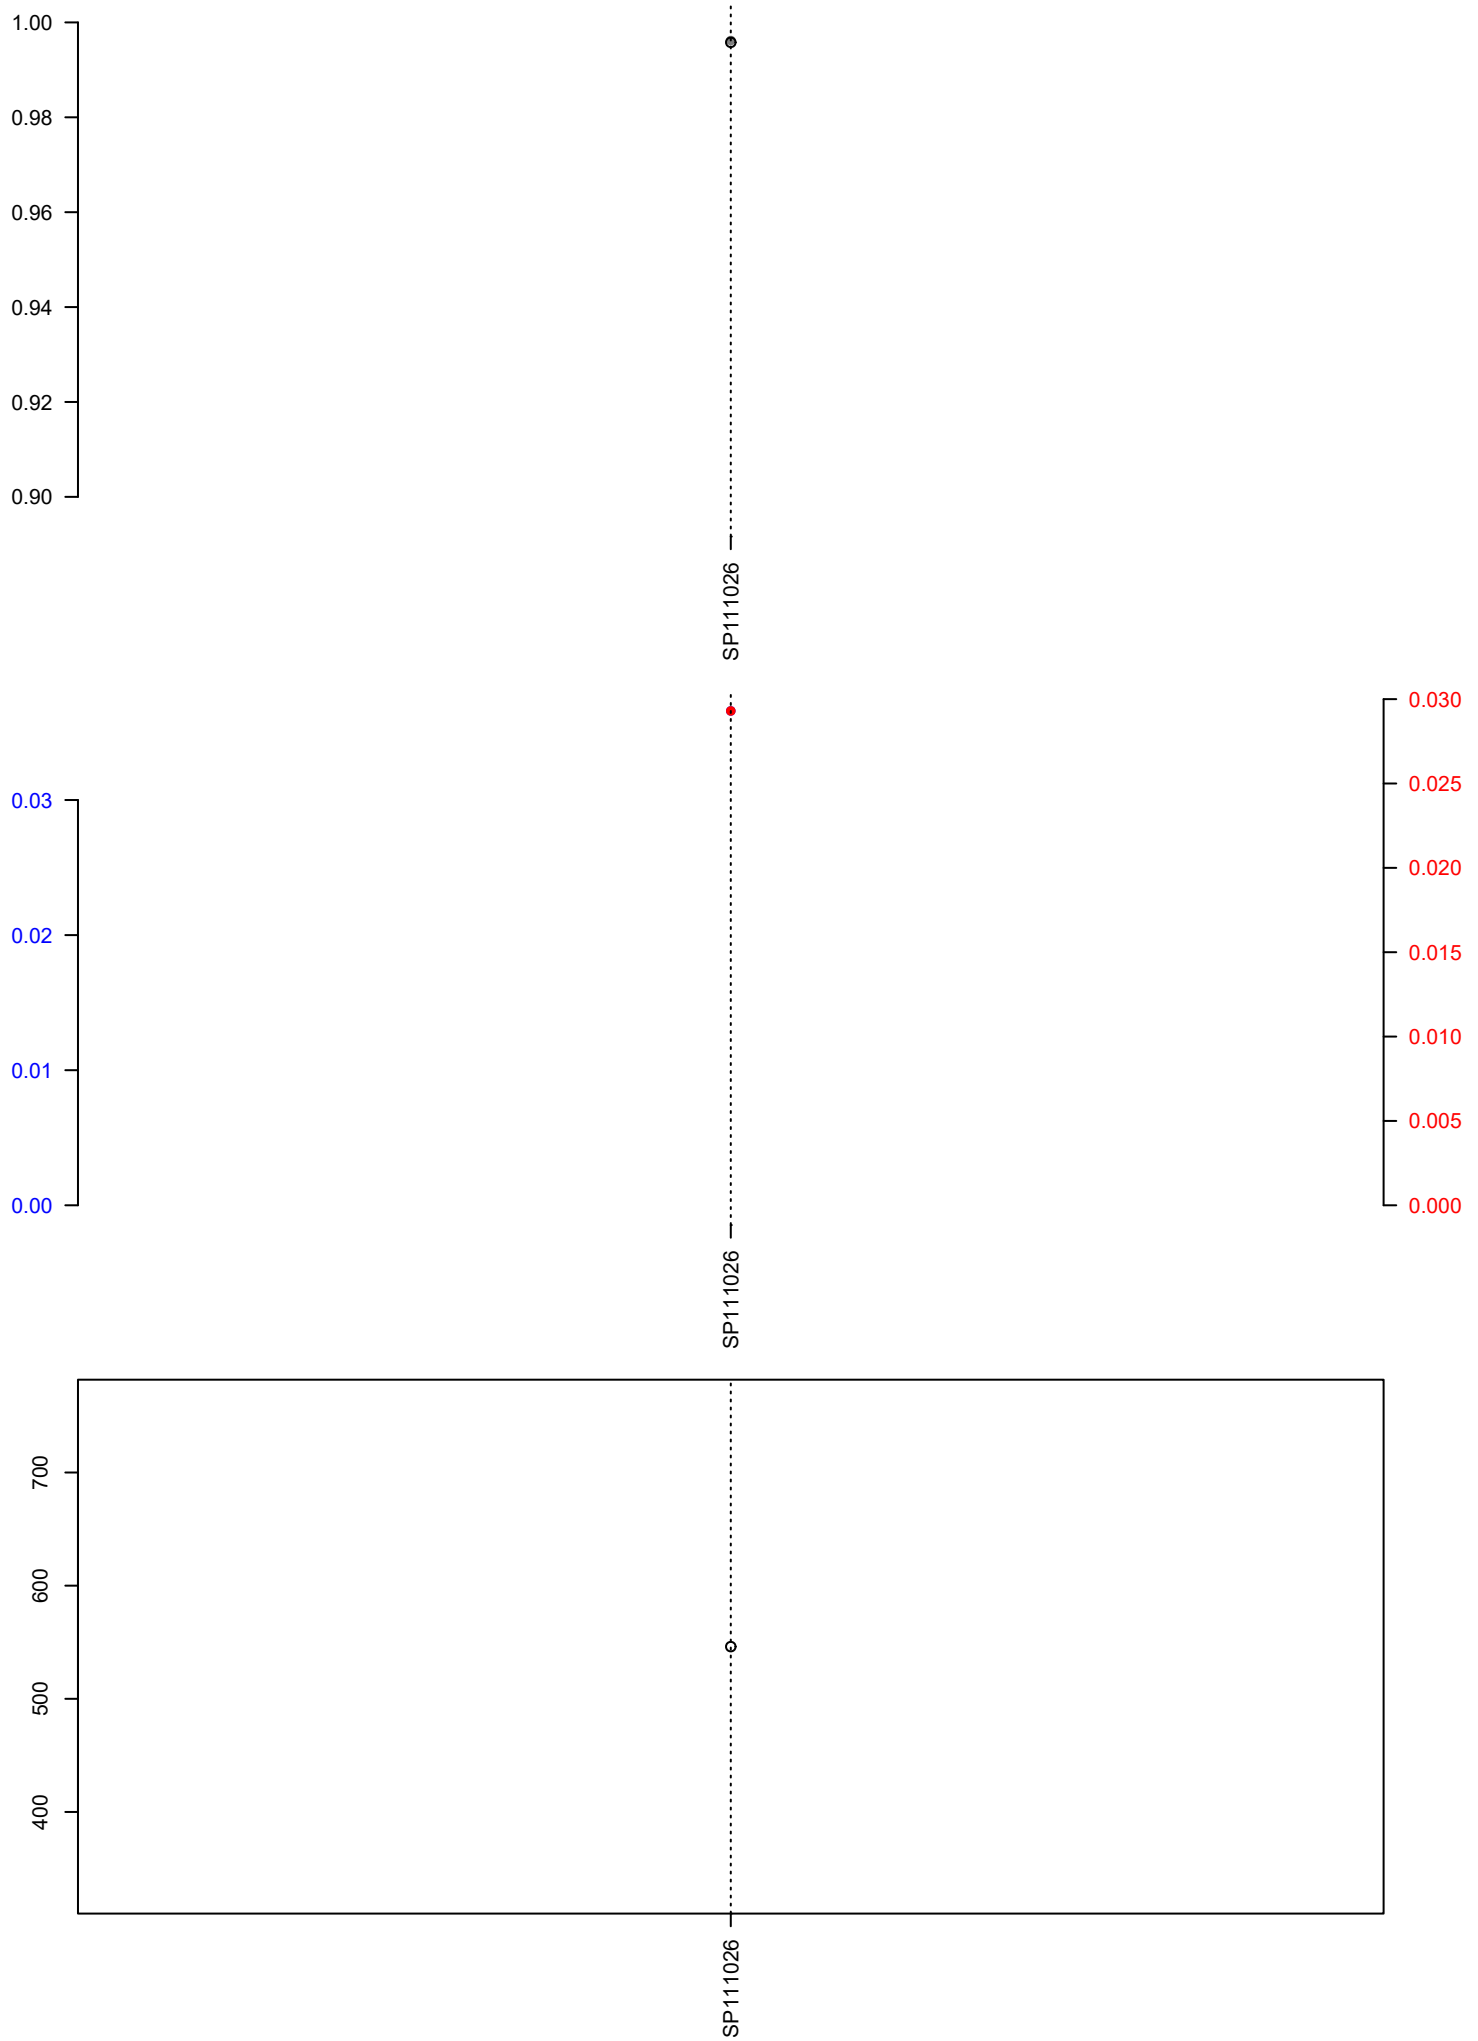

Supplement: Supplemental_Data_S2.zip [file SP111026.reconstruction.err.pdf › Supplemental_Data_S2/mSigAct_output/SP111026.reconstruction.err.pdf]

**SP111101**

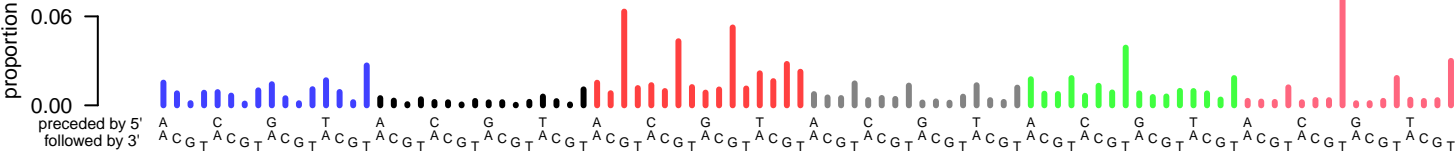

Supplement: Supplemental_Data_S2.zip [file SP111101.check.with.sig.pdf › Supplemental_Data_S2/mSigAct_output/SP111101.check.with.sig.pdf]

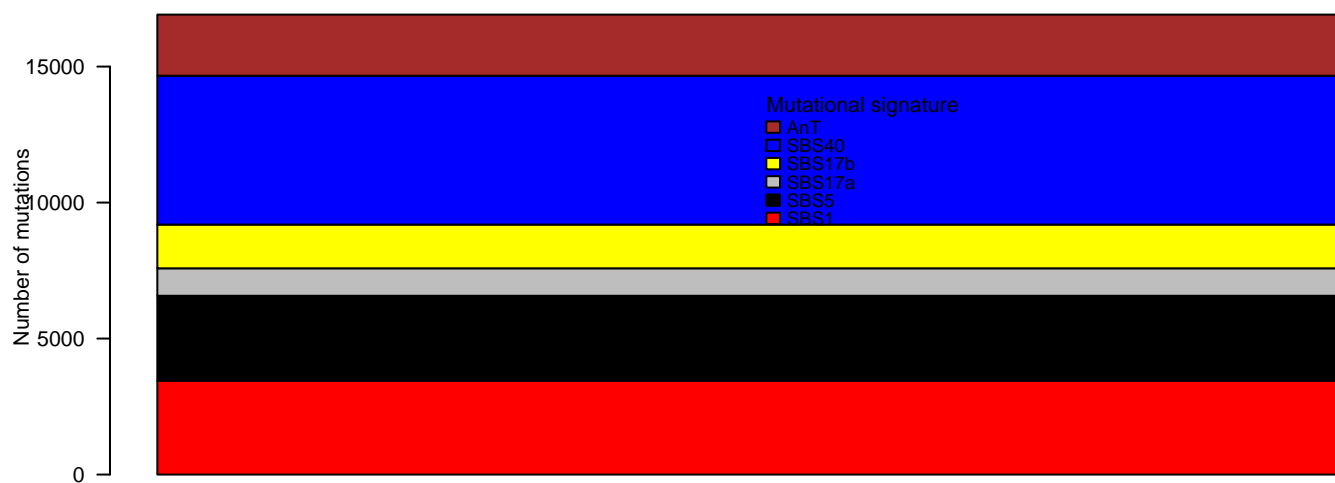

Supplement: Supplemental_Data_S2.zip [file SP111101.exposures.pdf › Supplemental_Data_S2/mSigAct_output/SP111101.exposures.pdf]

**Histogram of out.pvals**



Supplement: Supplemental_Data_S2.zip [file SP111101.pval.histogram.pdf › Supplemental_Data_S2/mSigAct_output/SP111101.pval.histogram.pdf]

Reconstruction error

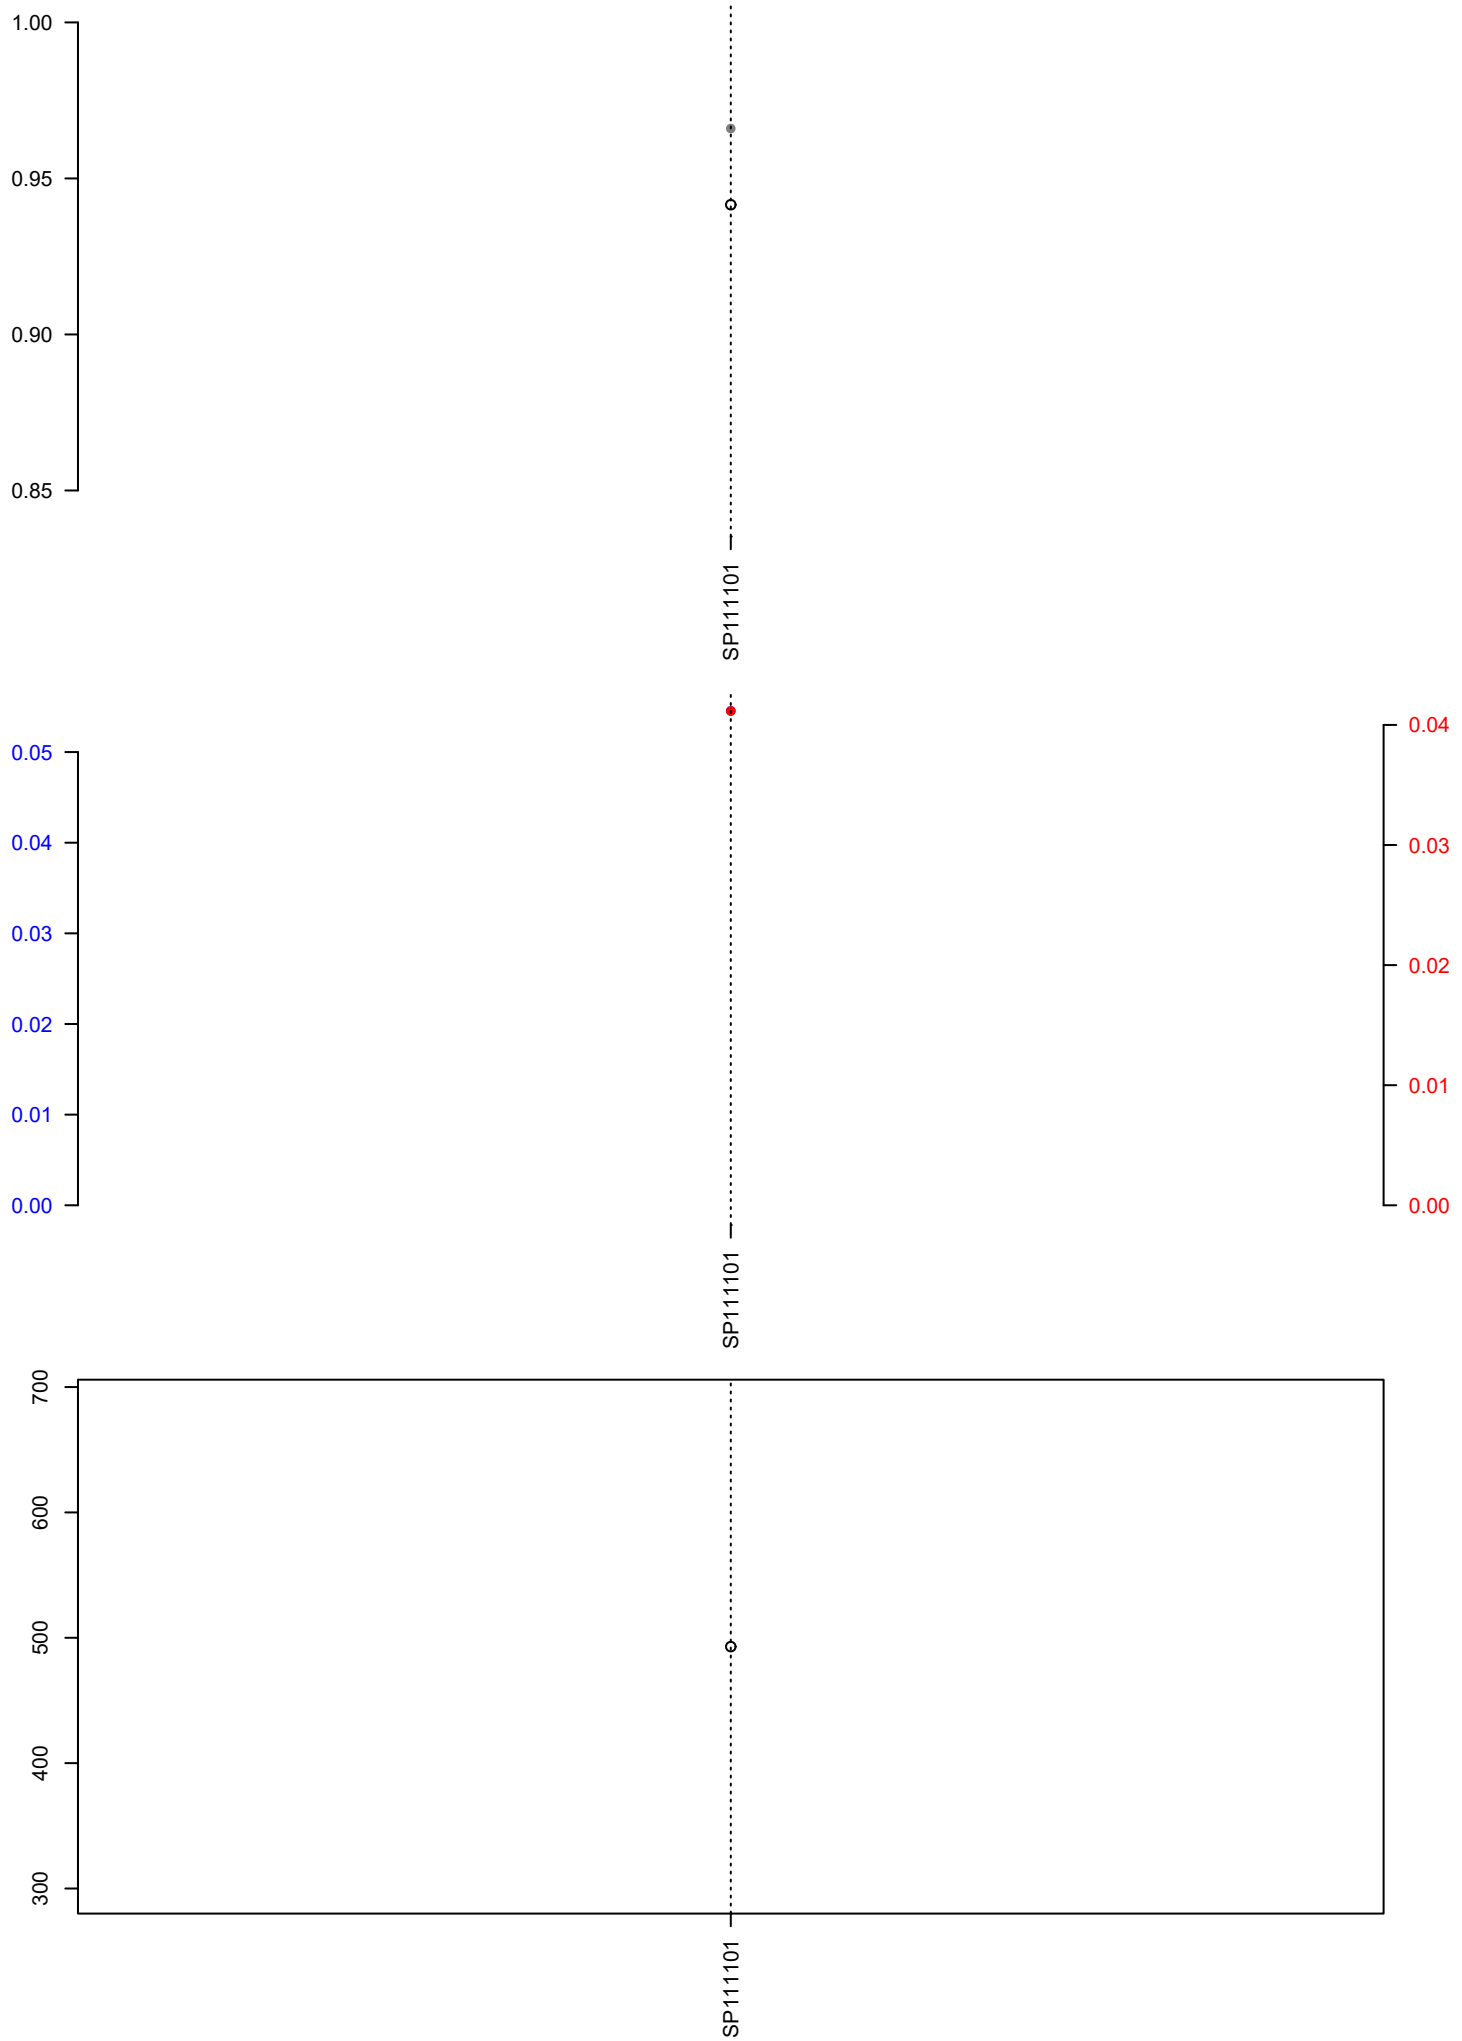

Supplement: Supplemental_Data_S2.zip [file SP111101.reconstruction.err.pdf › Supplemental_Data_S2/mSigAct_output/SP111101.reconstruction.err.pdf]

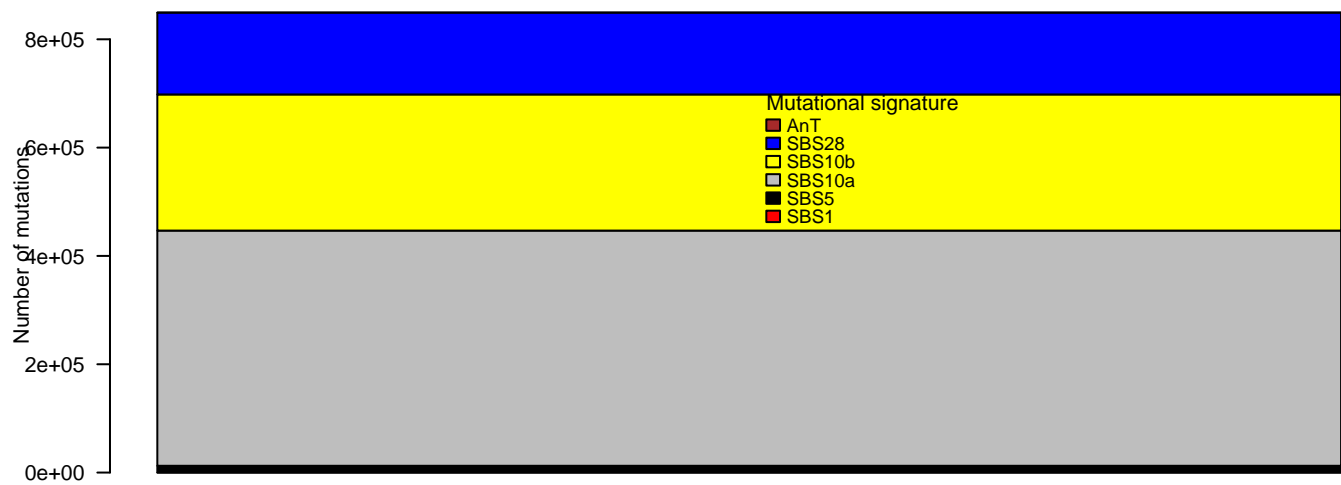

Supplement: Supplemental_Data_S2.zip [file SP16886.exposures.pdf › Supplemental_Data_S2/mSigAct_output/SP16886.exposures.pdf]

**Histogram of out.pvals**

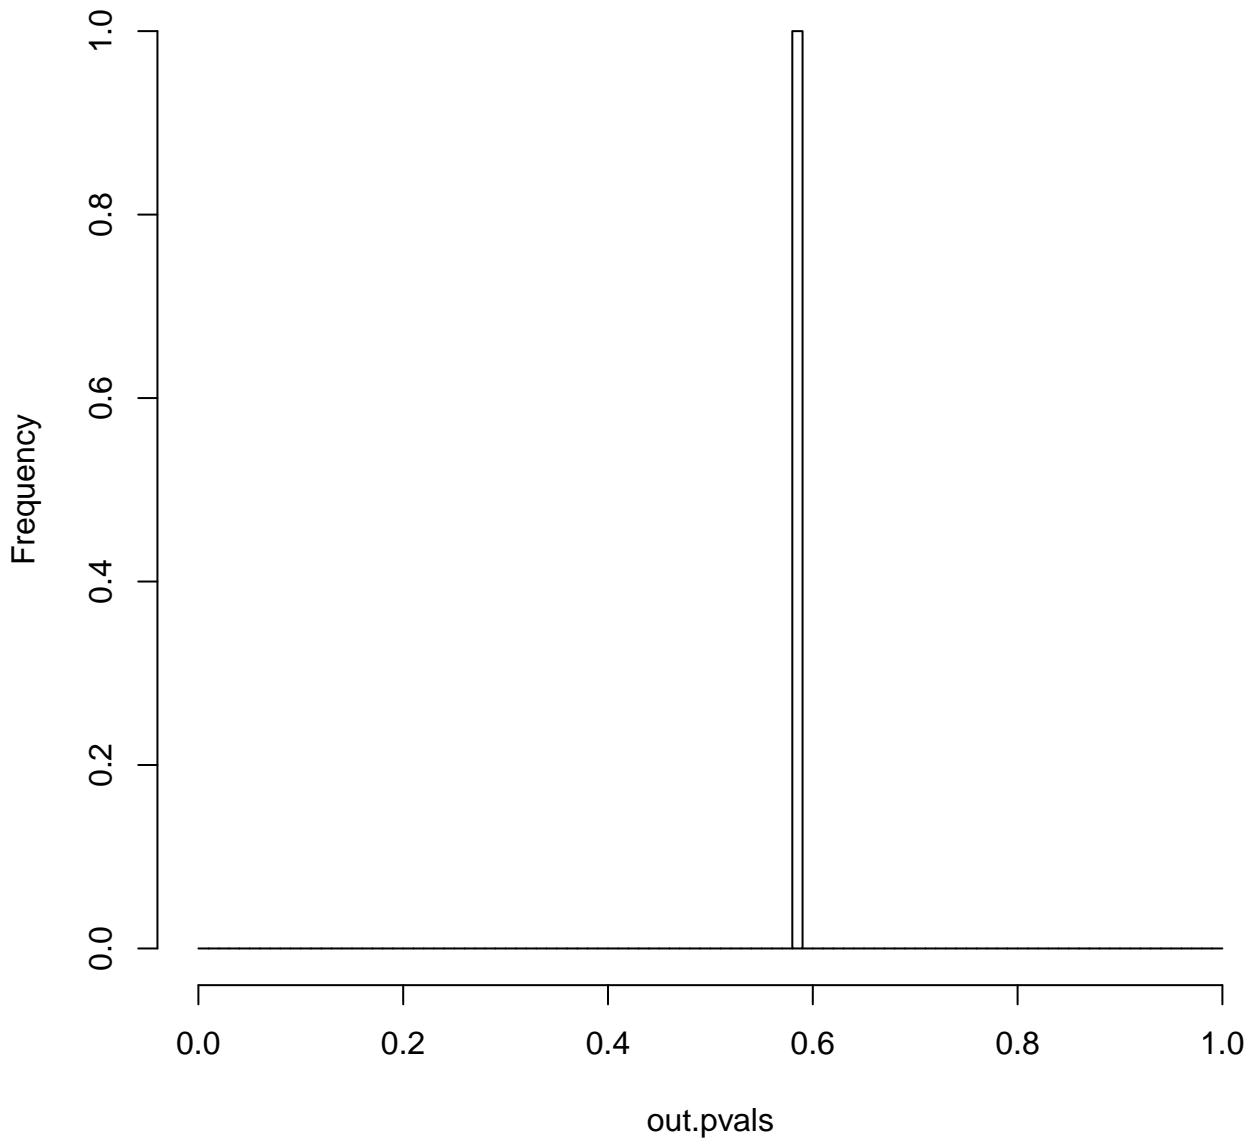

Supplement: Supplemental_Data_S2.zip [file SP16886.pval.histogram.pdf › Supplemental_Data_S2/mSigAct_output/SP16886.pval.histogram.pdf]

Reconstruction error

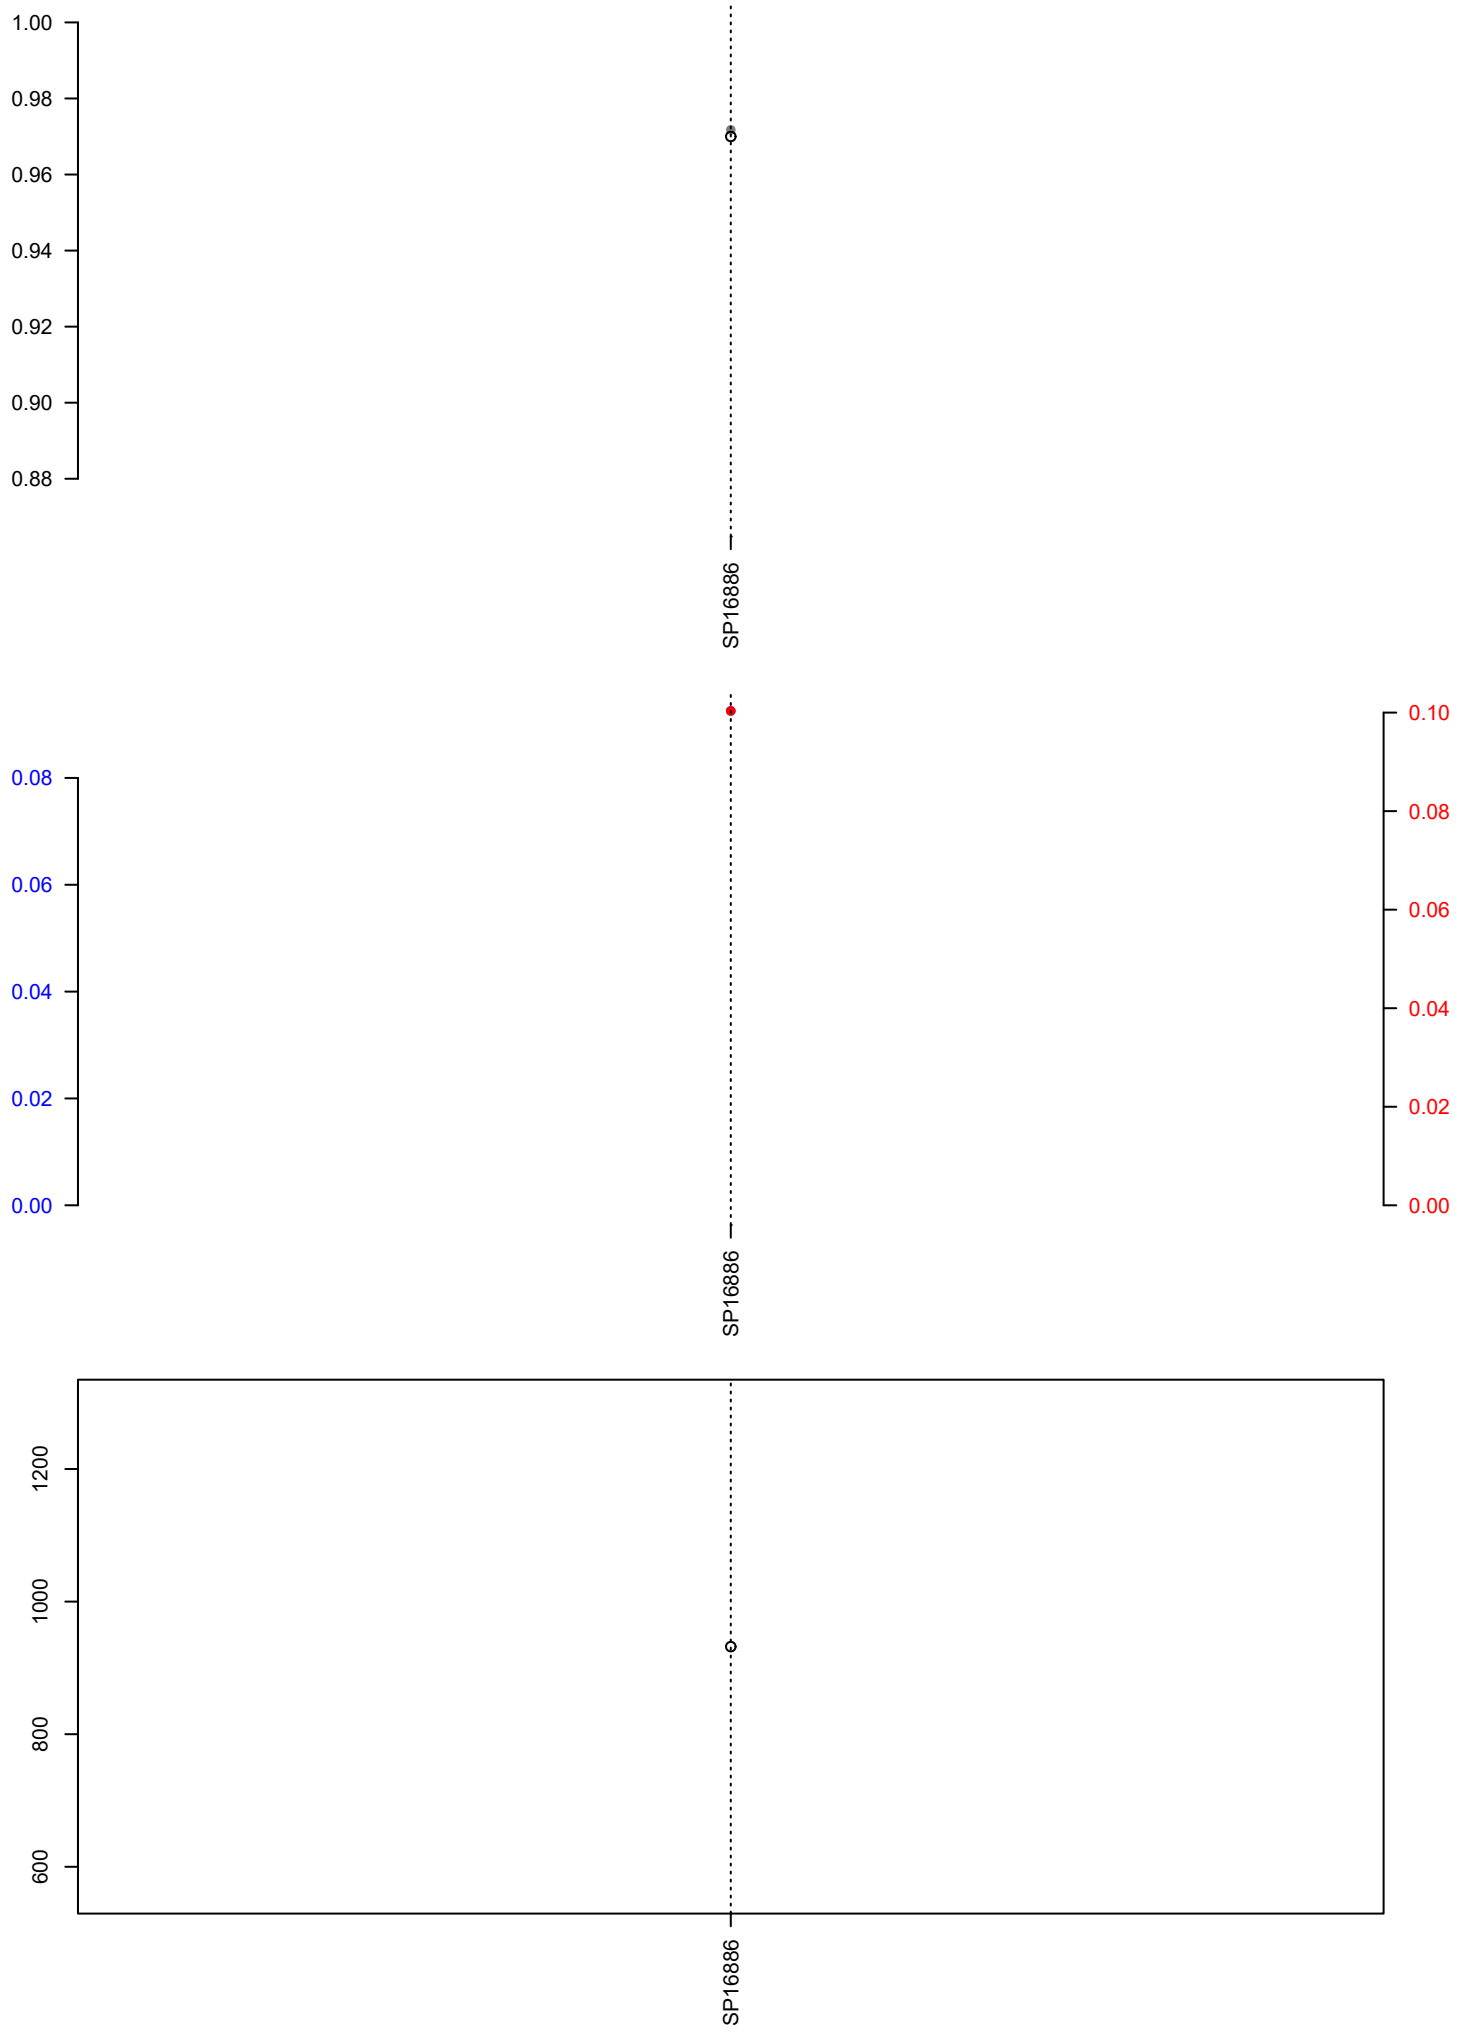

Supplement: Supplemental_Data_S2.zip [file SP16886.reconstruction.err.pdf › Supplemental_Data_S2/mSigAct_output/SP16886.reconstruction.err.pdf]

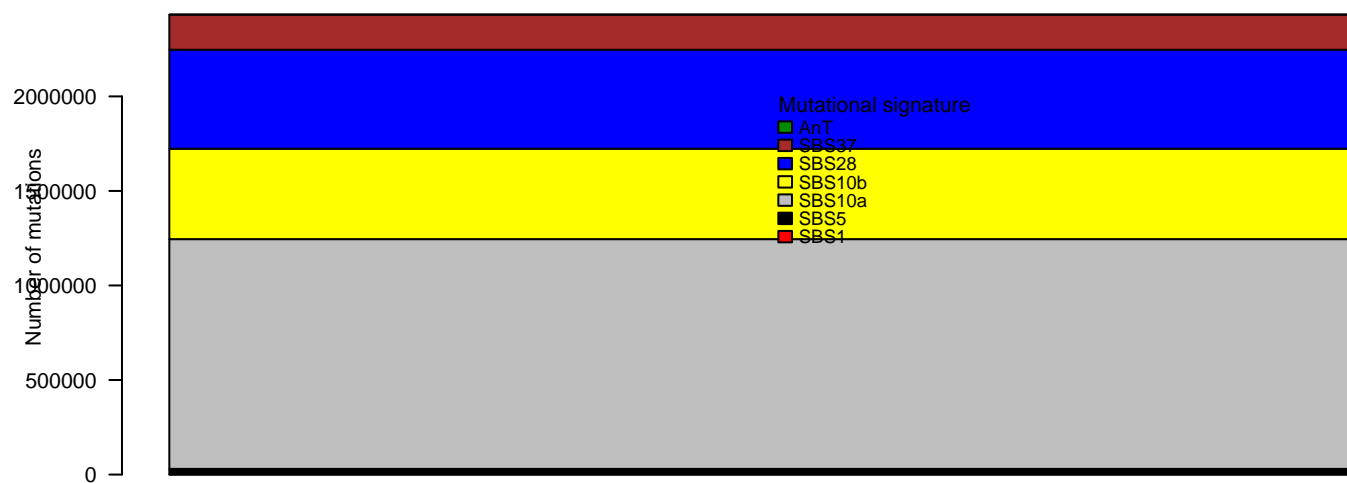

Supplement: Supplemental_Data_S2.zip [file SP17905.exposures.pdf › Supplemental_Data_S2/mSigAct_output/SP17905.exposures.pdf]

**Histogram of out.pvals**

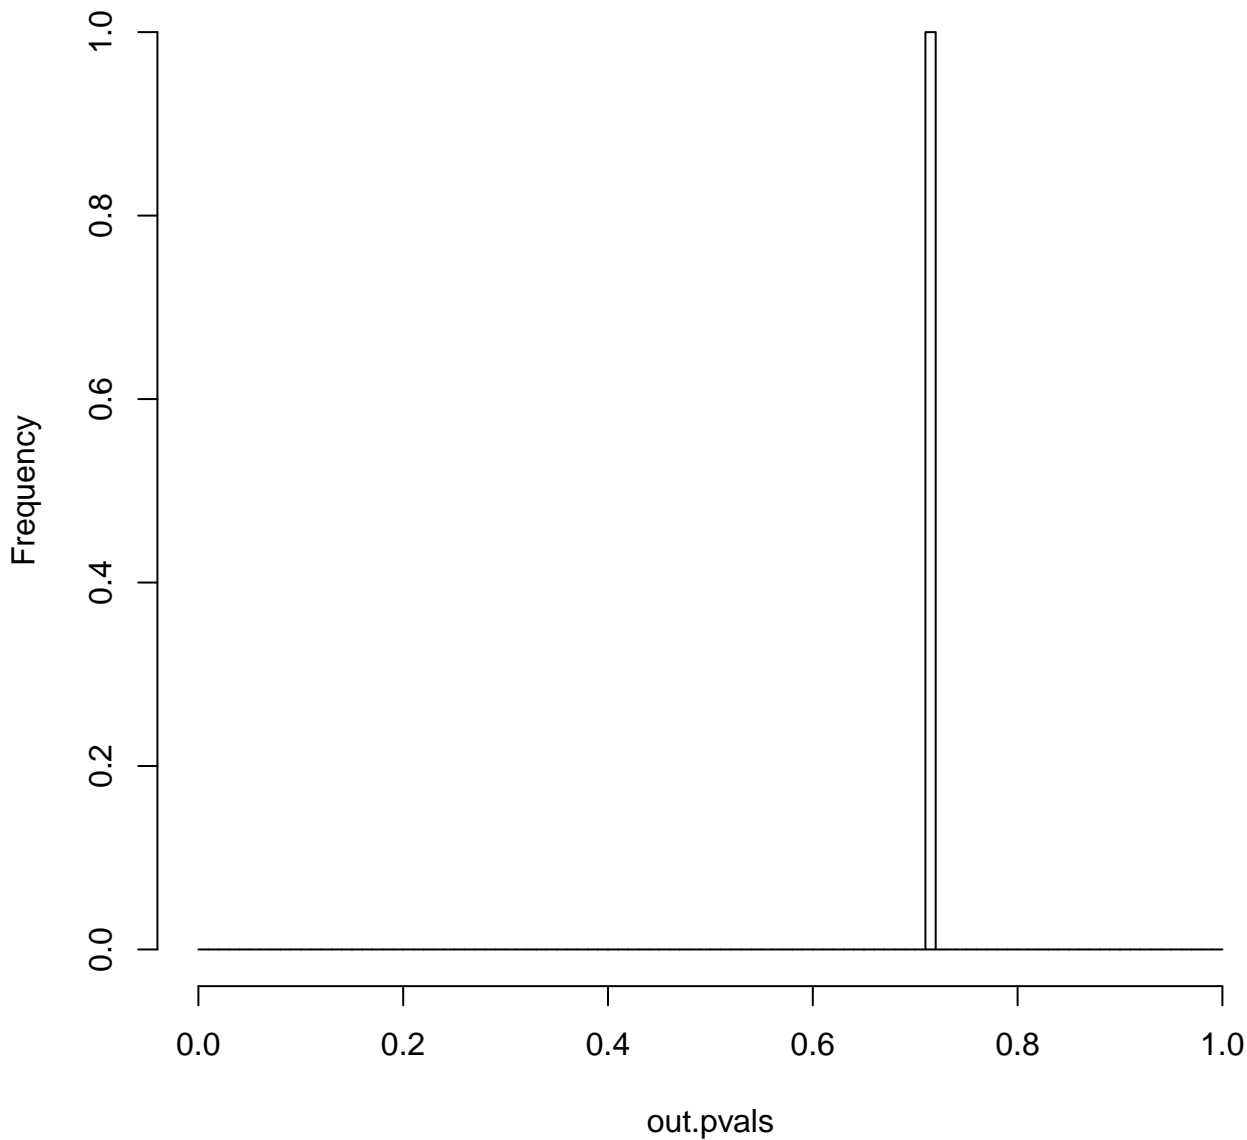

Supplement: Supplemental_Data_S2.zip [file SP17905.pval.histogram.pdf › Supplemental_Data_S2/mSigAct_output/SP17905.pval.histogram.pdf]

Reconstruction error

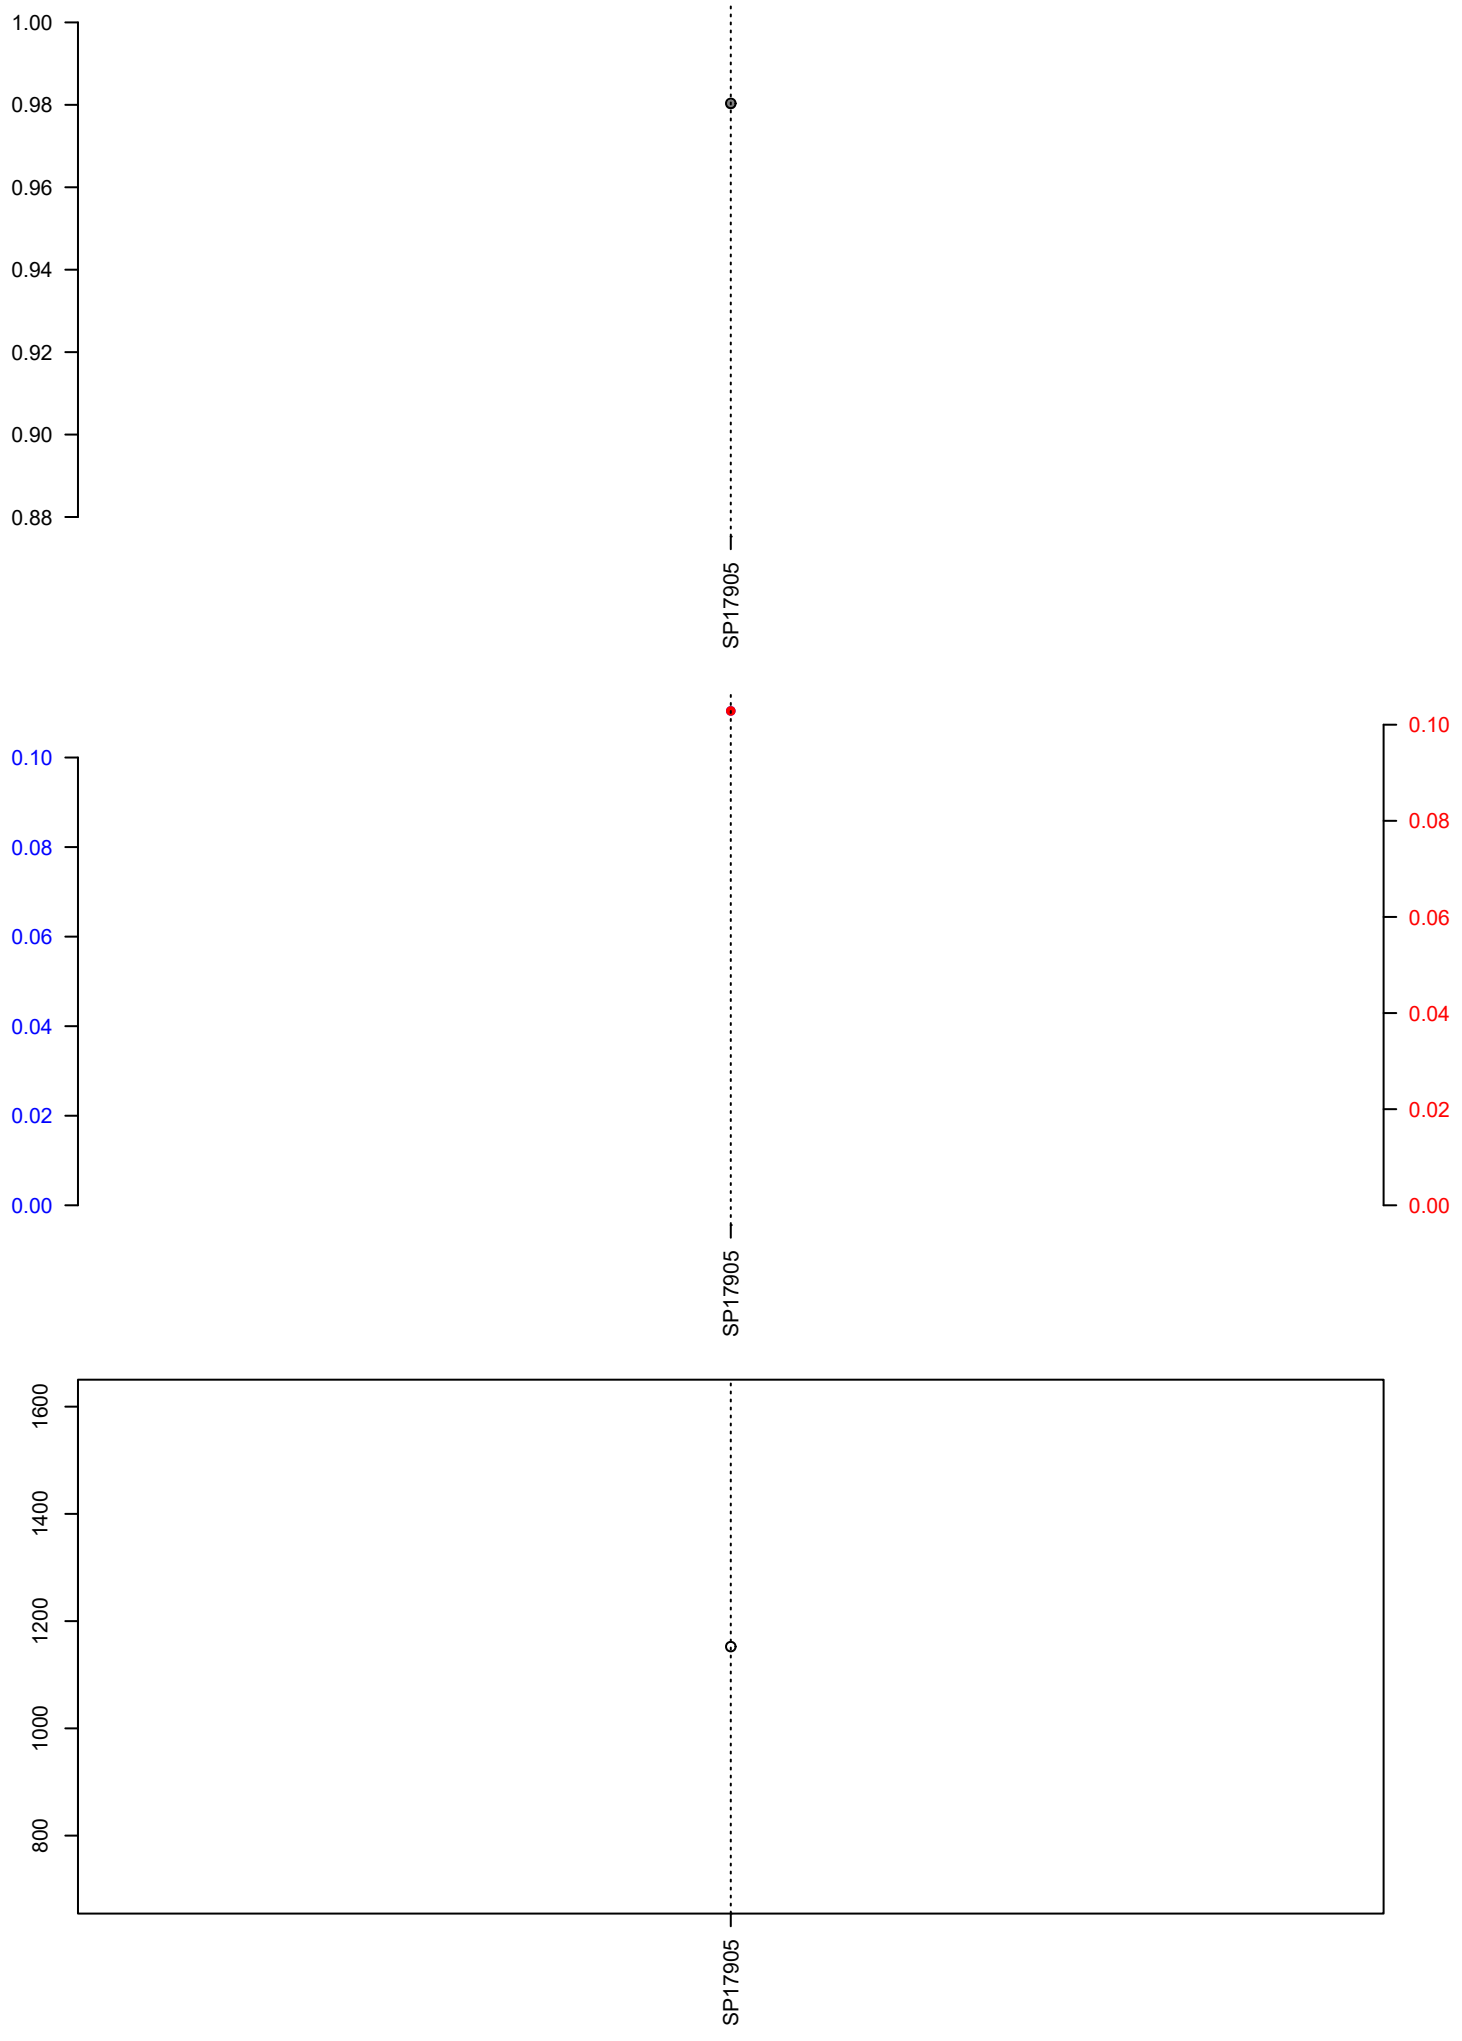

Supplement: Supplemental_Data_S2.zip [file SP17905.reconstruction.err.pdf › Supplemental_Data_S2/mSigAct_output/SP17905.reconstruction.err.pdf]

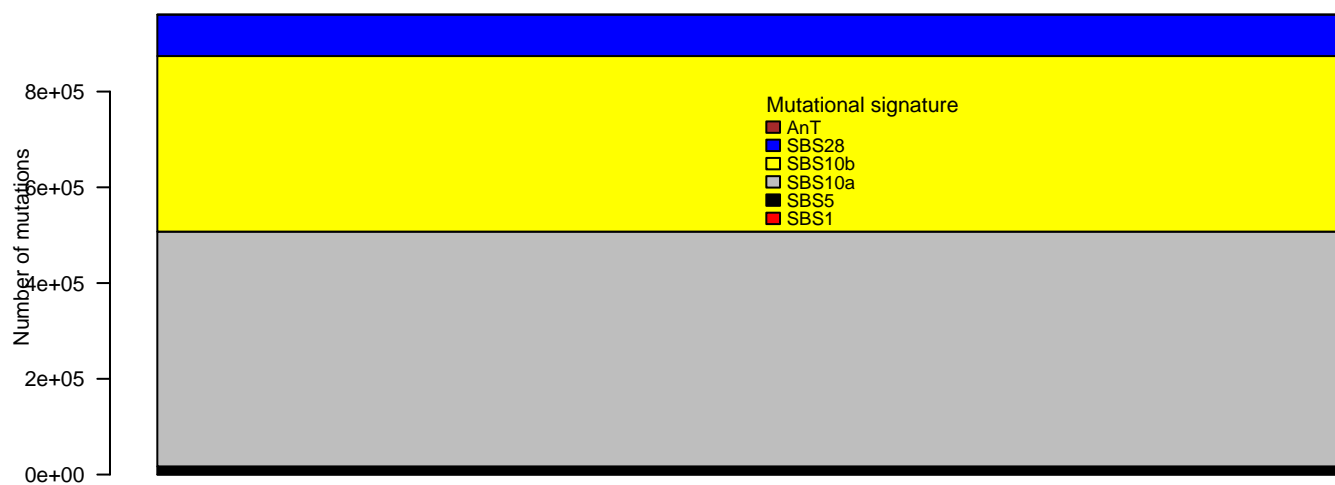

Supplement: Supplemental_Data_S2.zip [file SP18946.exposures.pdf › Supplemental_Data_S2/mSigAct_output/SP18946.exposures.pdf]

**Histogram of out.pvals**

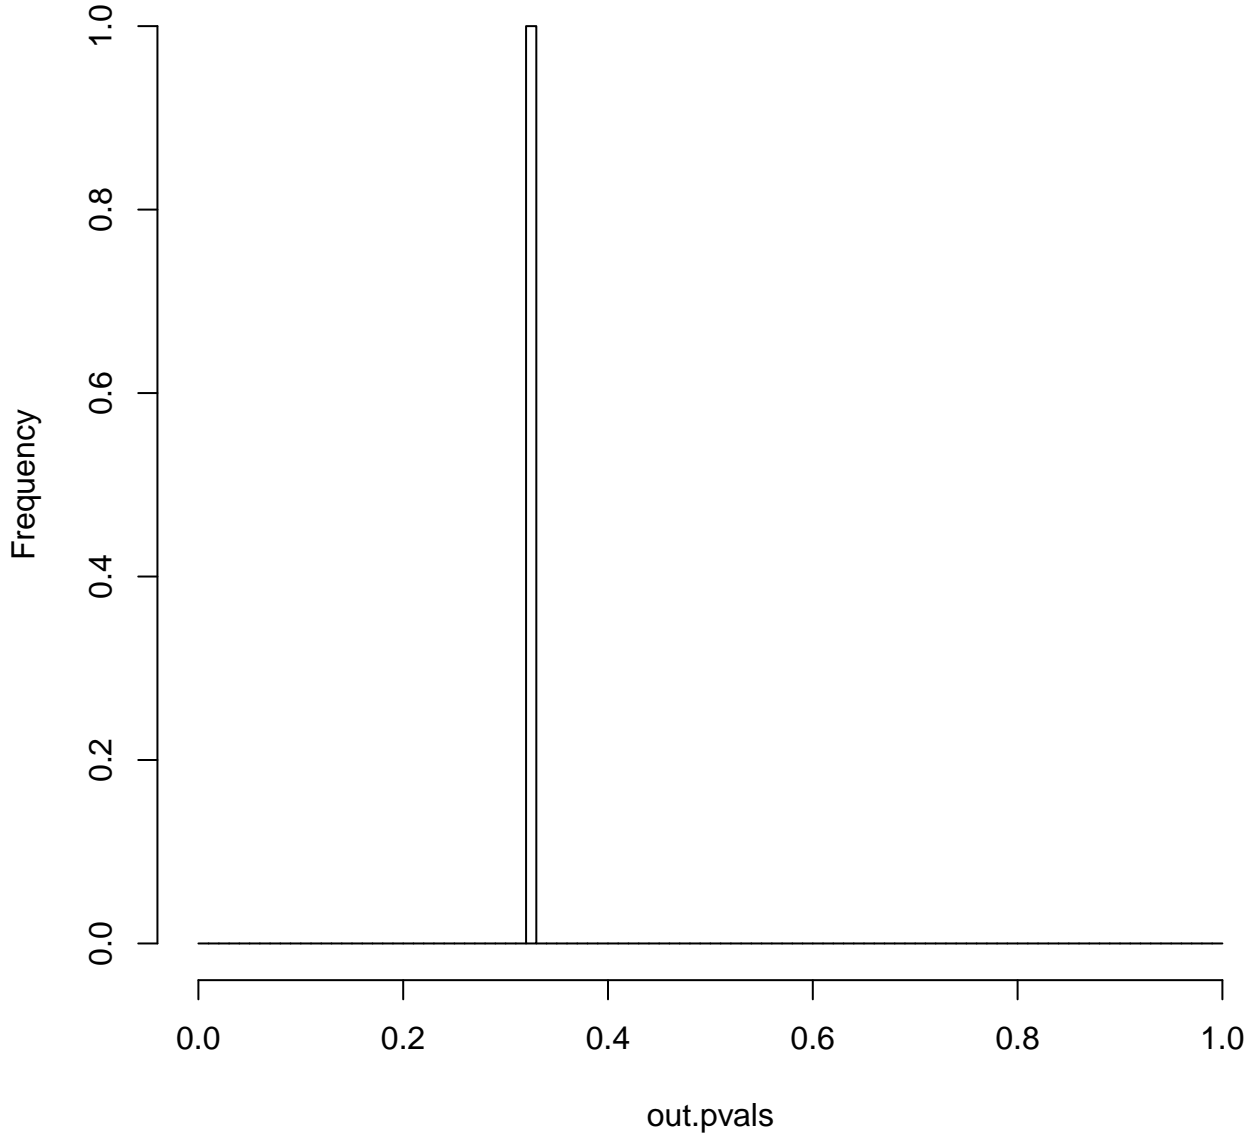

Supplement: Supplemental_Data_S2.zip [file SP18946.pval.histogram.pdf › Supplemental_Data_S2/mSigAct_output/SP18946.pval.histogram.pdf]

Reconstruction error

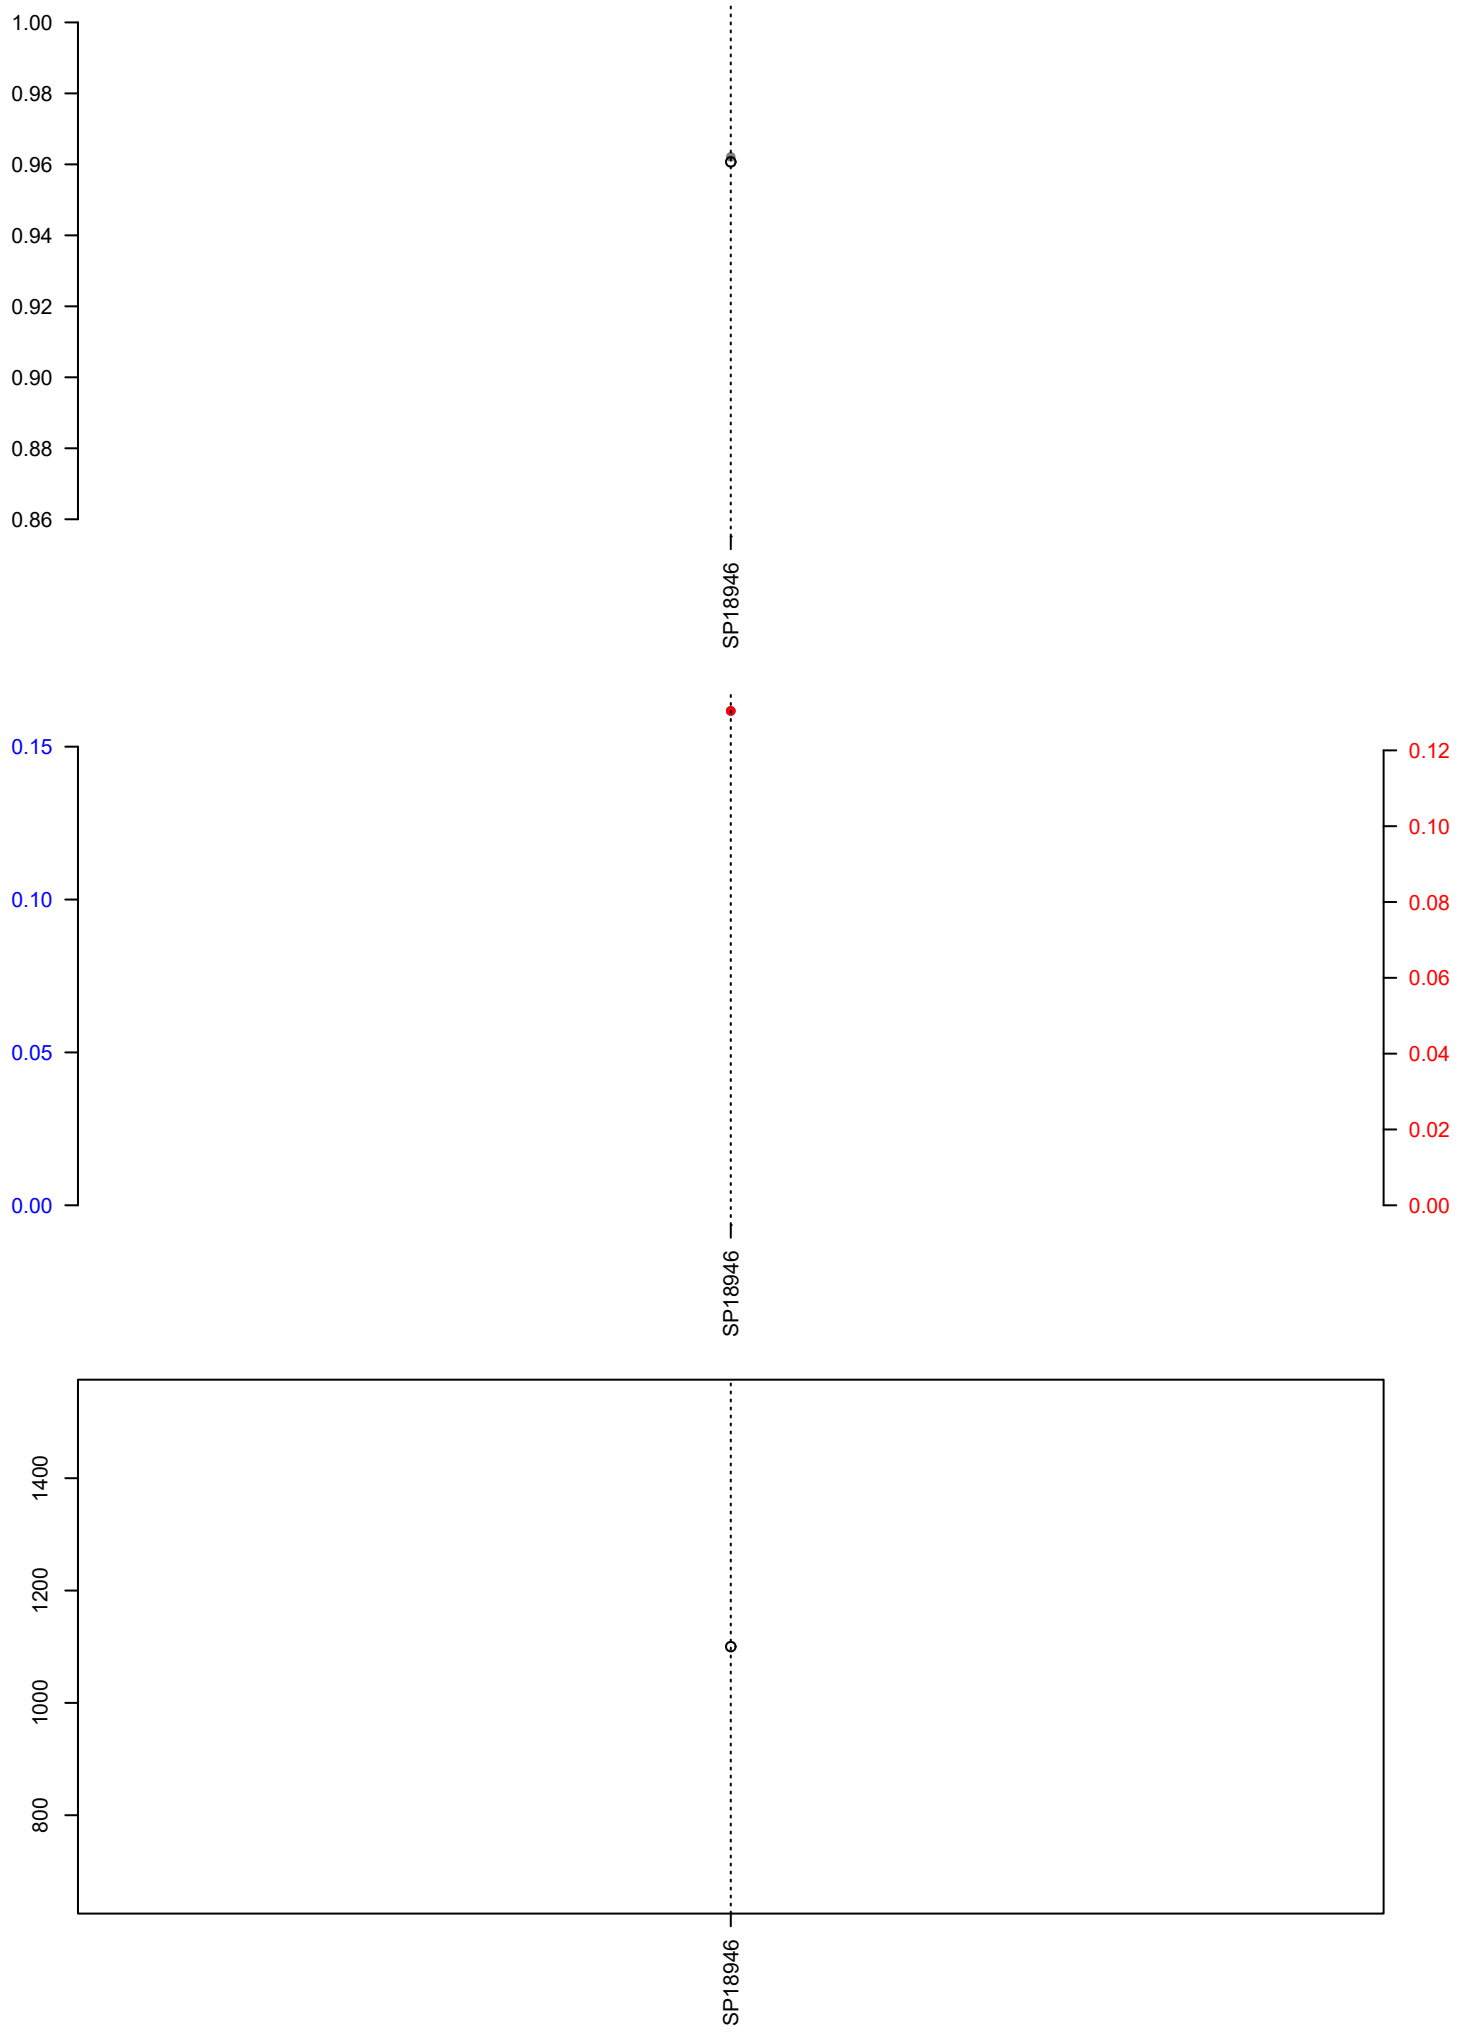

Supplement: Supplemental_Data_S2.zip [file SP18946.reconstruction.err.pdf › Supplemental_Data_S2/mSigAct_output/SP18946.reconstruction.err.pdf]

**SP19295**

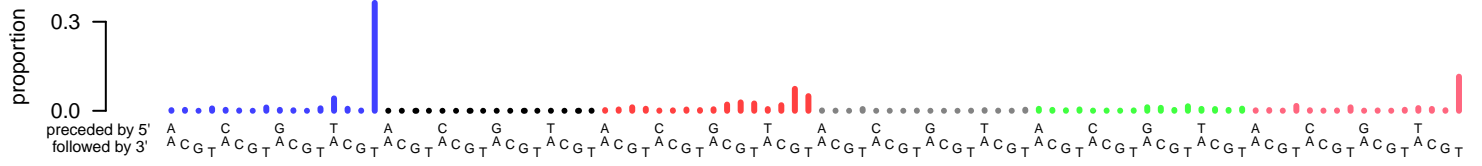

Supplement: Supplemental_Data_S2.zip [file SP19295.check.with.sig.pdf › Supplemental_Data_S2/mSigAct_output/SP19295.check.with.sig.pdf]

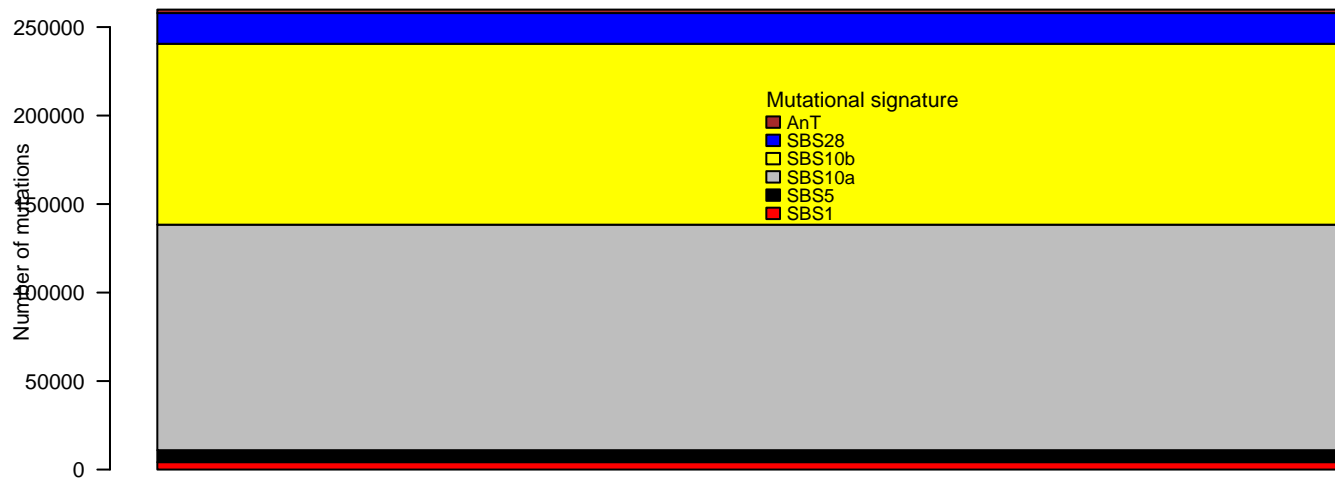

Supplement: Supplemental_Data_S2.zip [file SP19295.exposures.pdf › Supplemental_Data_S2/mSigAct_output/SP19295.exposures.pdf]

**Histogram of out.pvals**

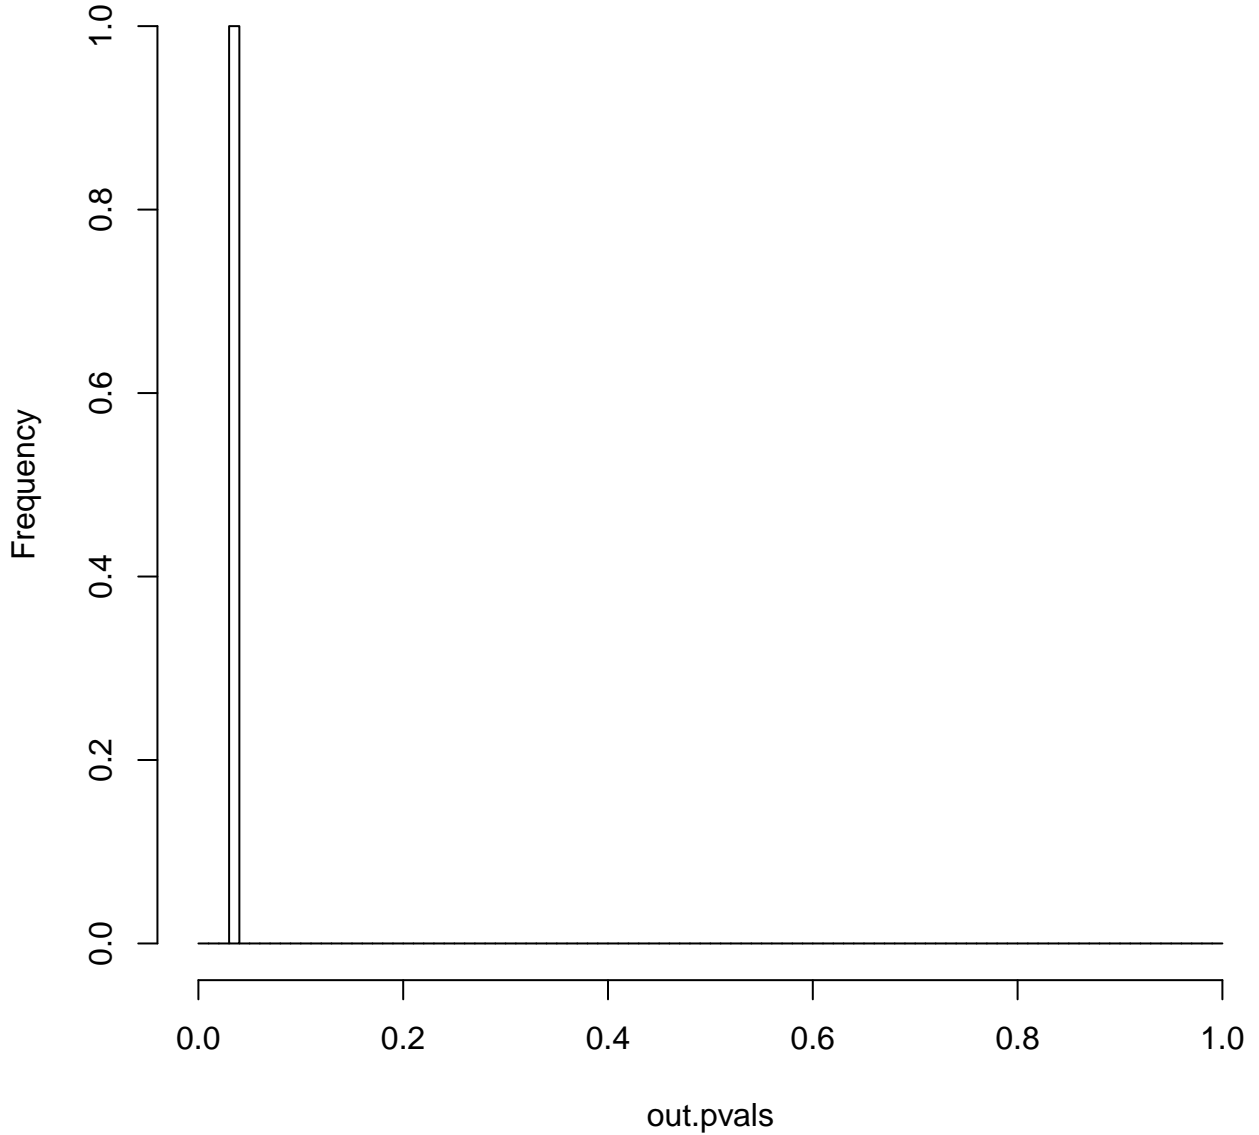

Supplement: Supplemental_Data_S2.zip [file SP19295.pval.histogram.pdf › Supplemental_Data_S2/mSigAct_output/SP19295.pval.histogram.pdf]

Reconstruction error

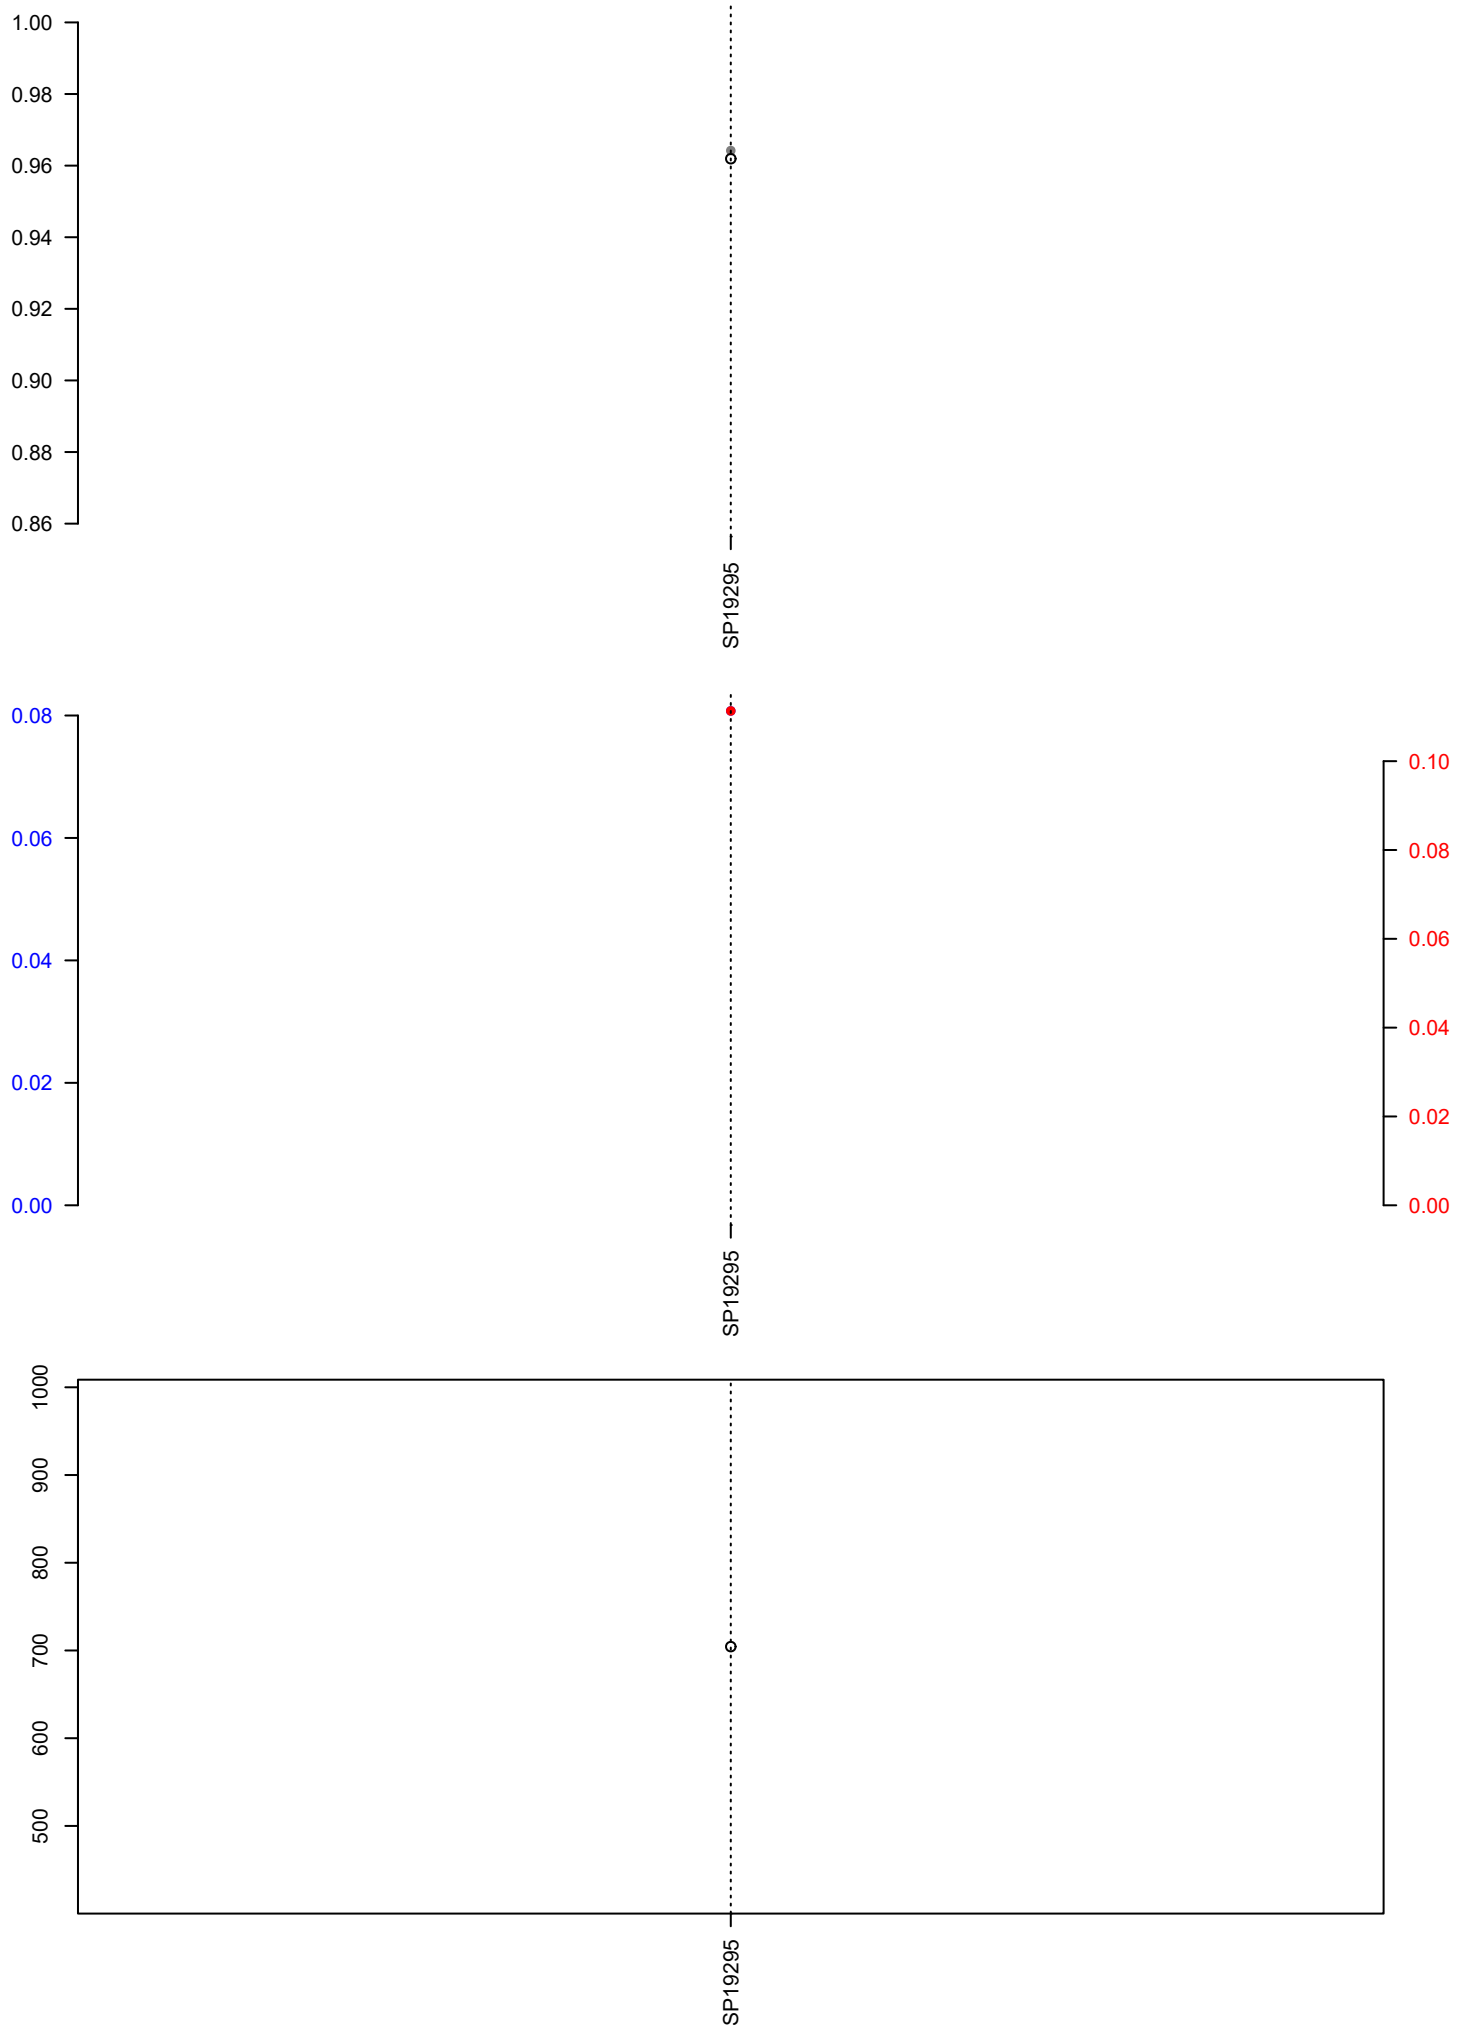

Supplement: Supplemental_Data_S2.zip [file SP19295.reconstruction.err.pdf › Supplemental_Data_S2/mSigAct_output/SP19295.reconstruction.err.pdf]

**SP21400**

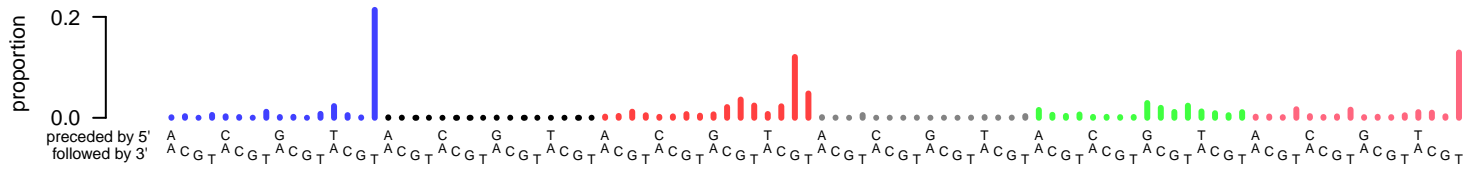

Supplement: Supplemental_Data_S2.zip [file SP21400.check.with.sig.pdf › Supplemental_Data_S2/mSigAct_output/SP21400.check.with.sig.pdf]

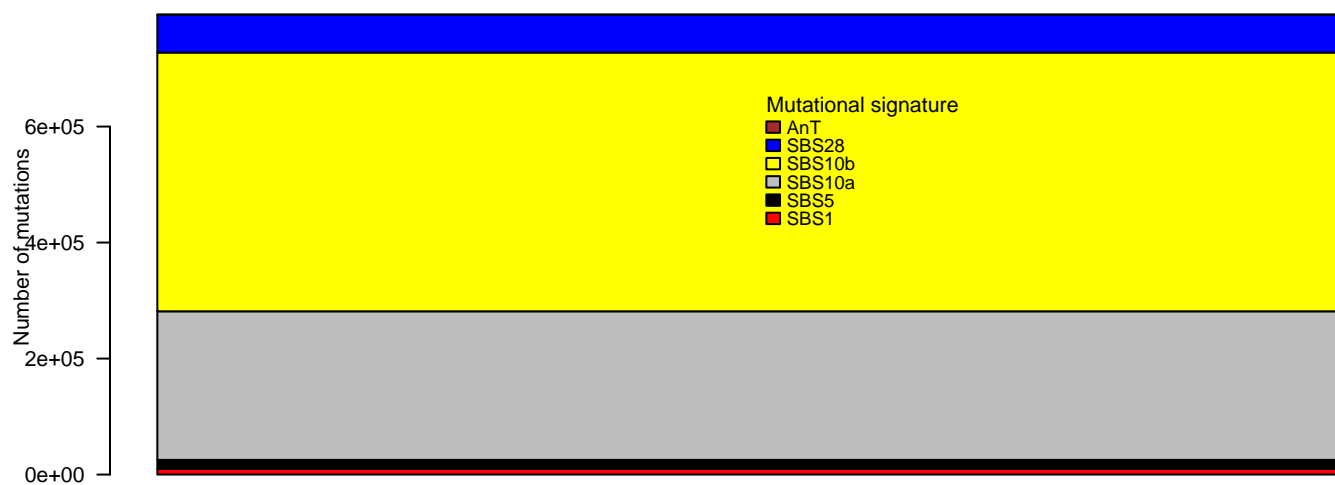

Supplement: Supplemental_Data_S2.zip [file SP21400.exposures.pdf › Supplemental_Data_S2/mSigAct_output/SP21400.exposures.pdf]

**Histogram of out.pvals**



Supplement: Supplemental_Data_S2.zip [file SP21400.pval.histogram.pdf › Supplemental_Data_S2/mSigAct_output/SP21400.pval.histogram.pdf]

Reconstruction error

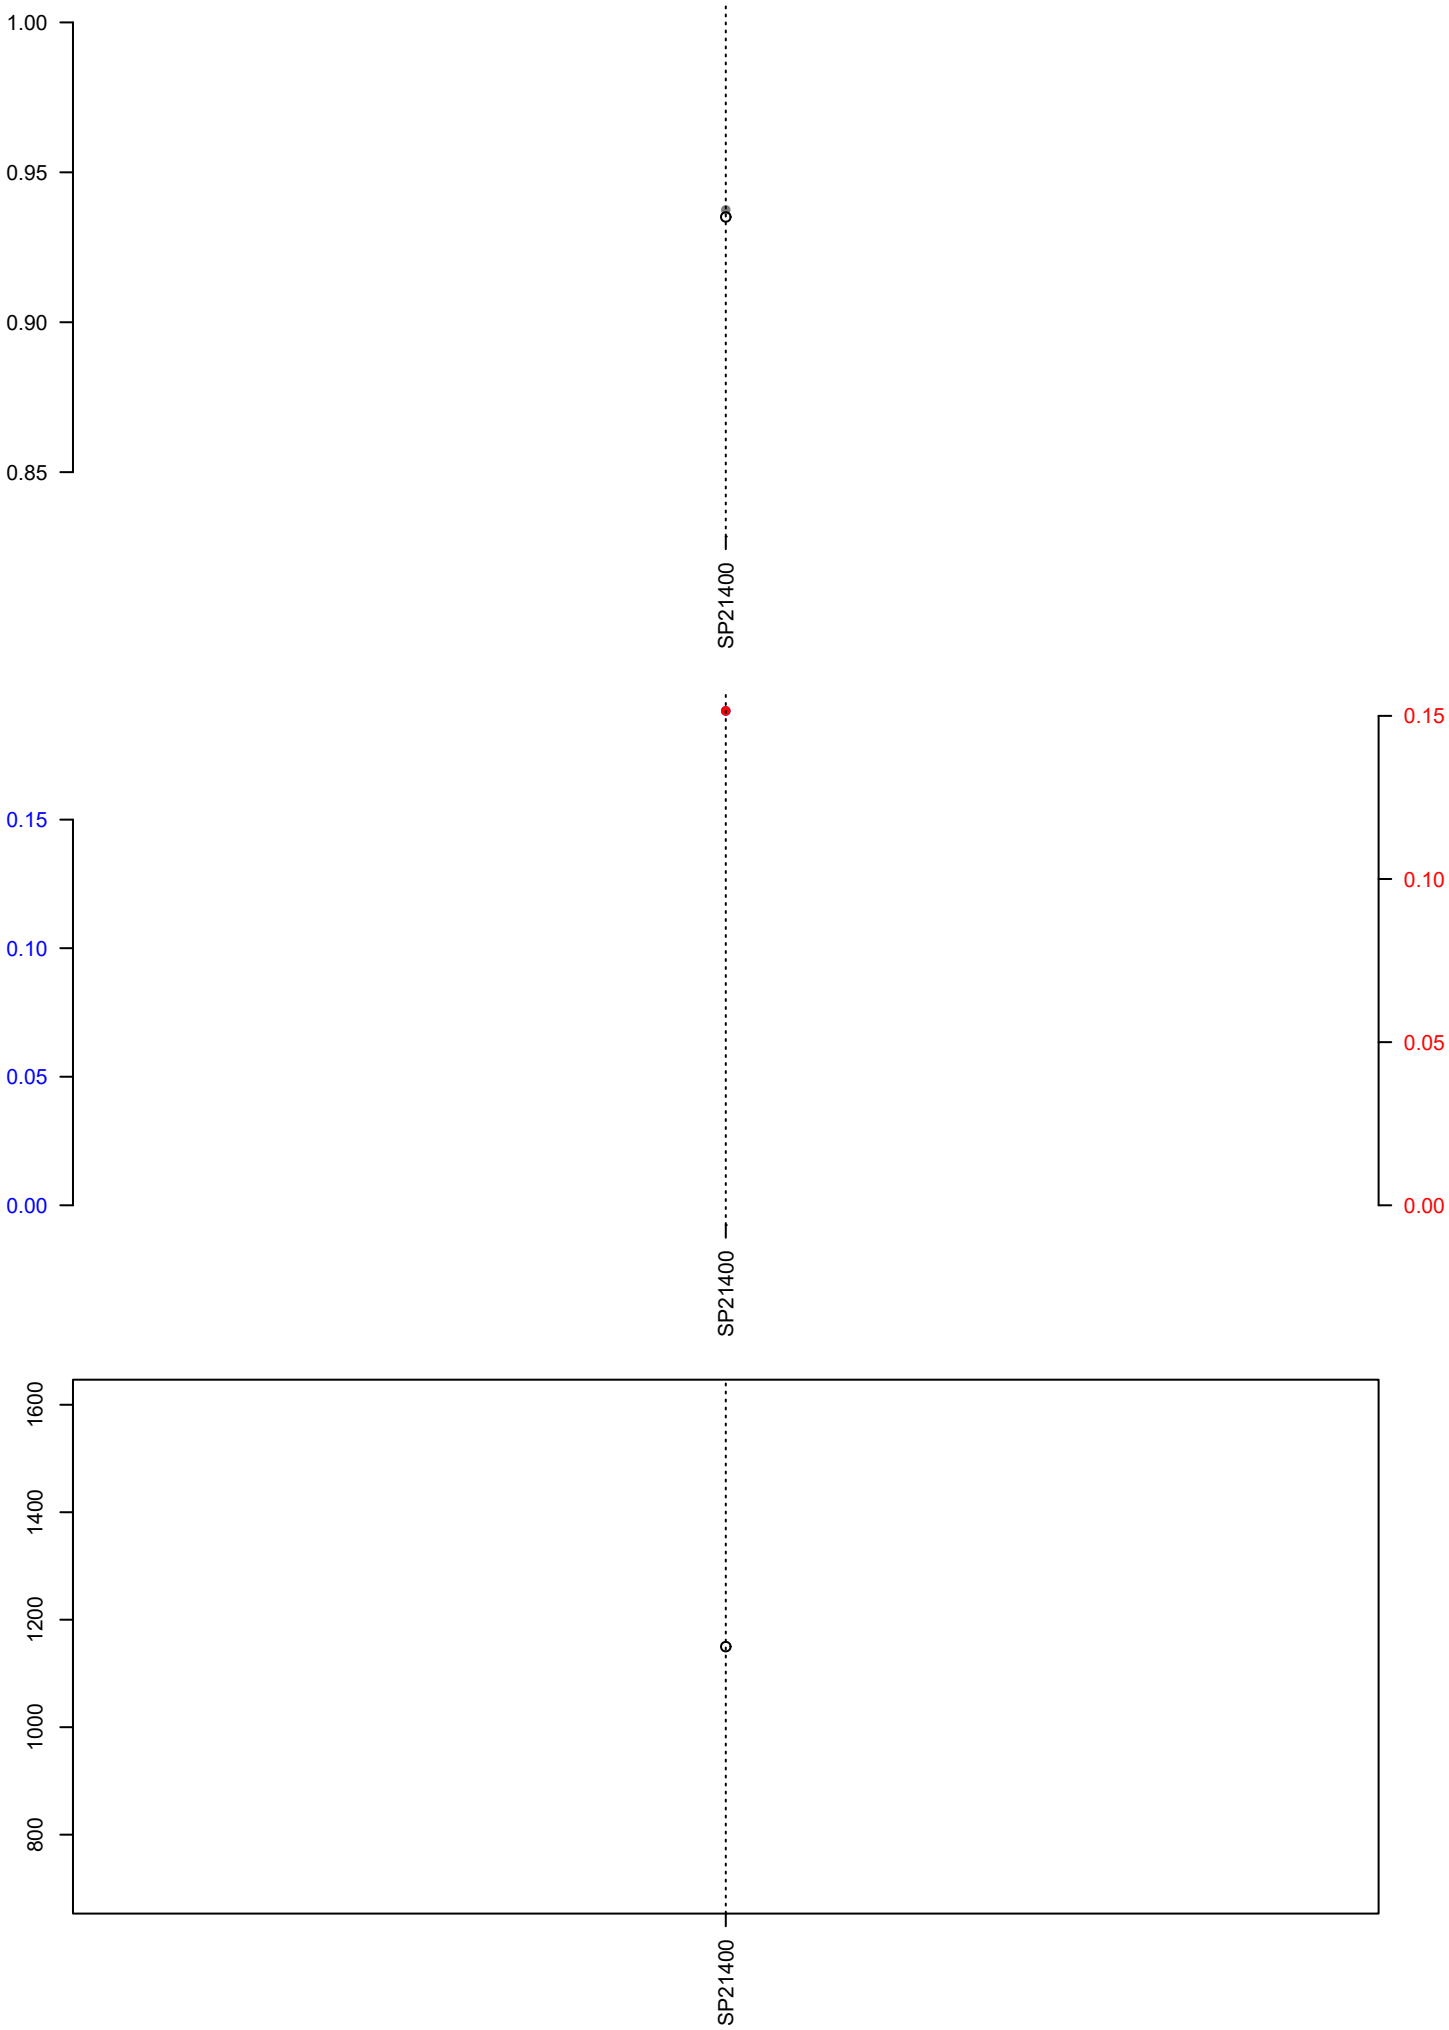

Supplement: Supplemental_Data_S2.zip [file SP21400.reconstruction.err.pdf › Supplemental_Data_S2/mSigAct_output/SP21400.reconstruction.err.pdf]

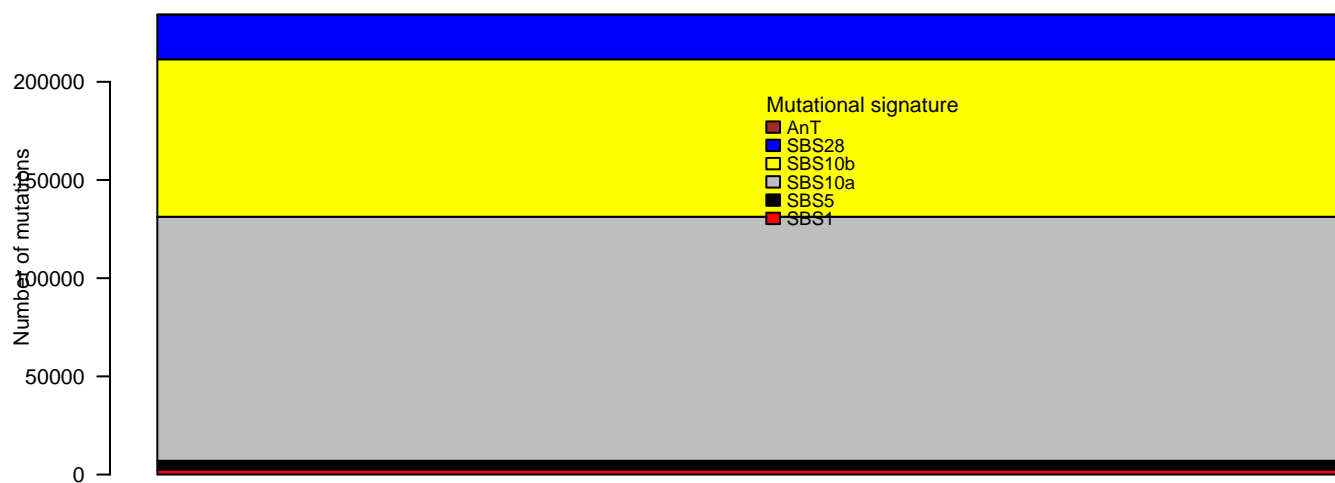

Supplement: Supplemental_Data_S2.zip [file SP22031.exposures.pdf › Supplemental_Data_S2/mSigAct_output/SP22031.exposures.pdf]

**Histogram of out.pvals**

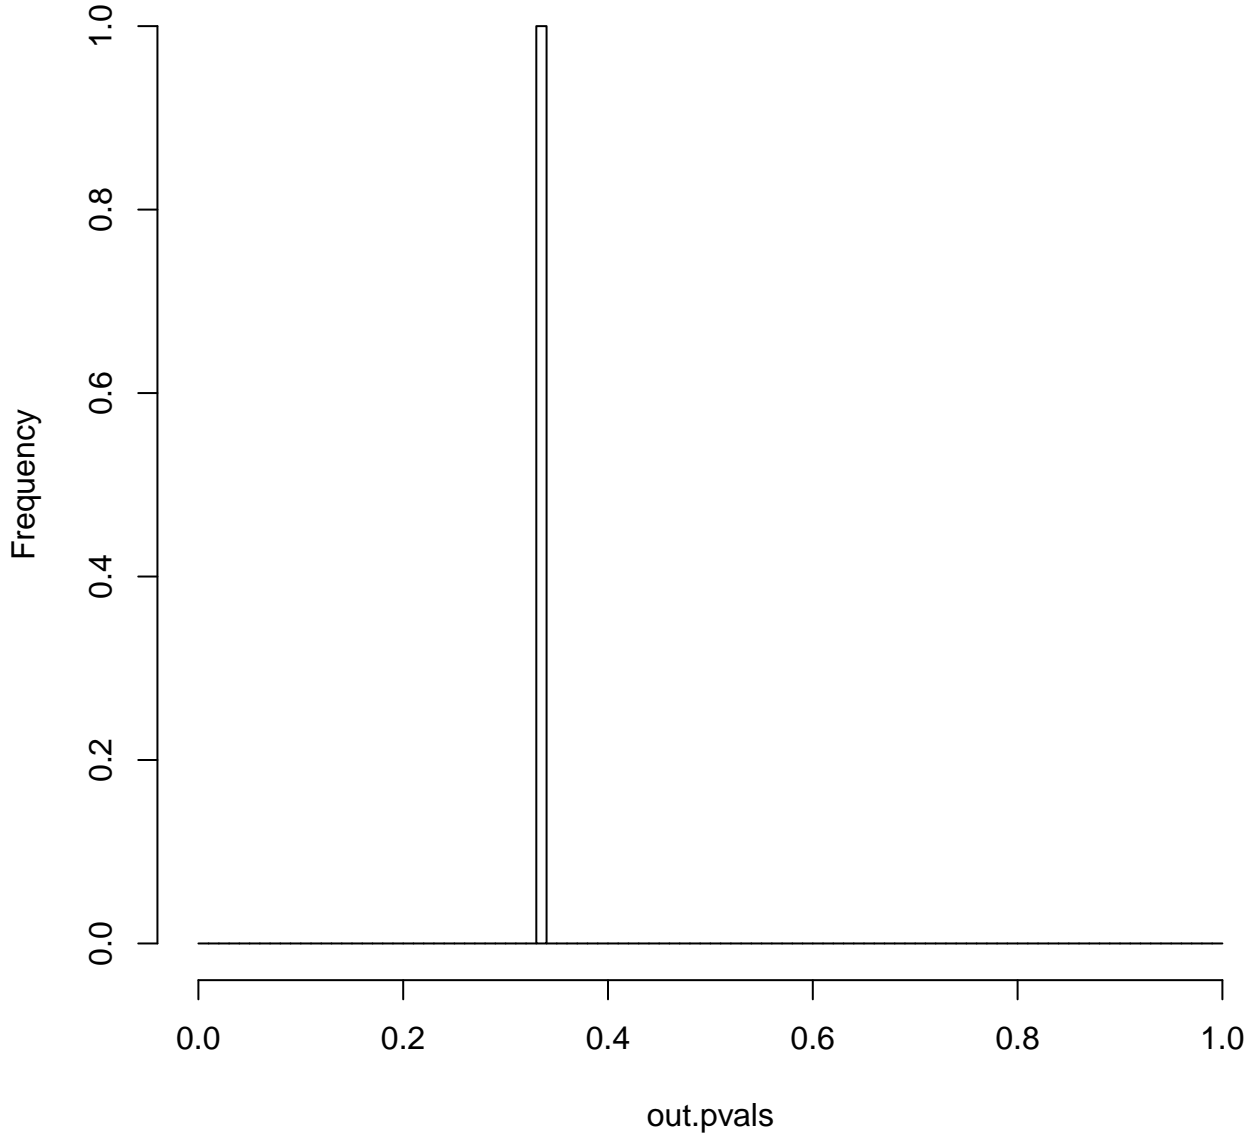

Supplement: Supplemental_Data_S2.zip [file SP22031.pval.histogram.pdf › Supplemental_Data_S2/mSigAct_output/SP22031.pval.histogram.pdf]

Reconstruction error

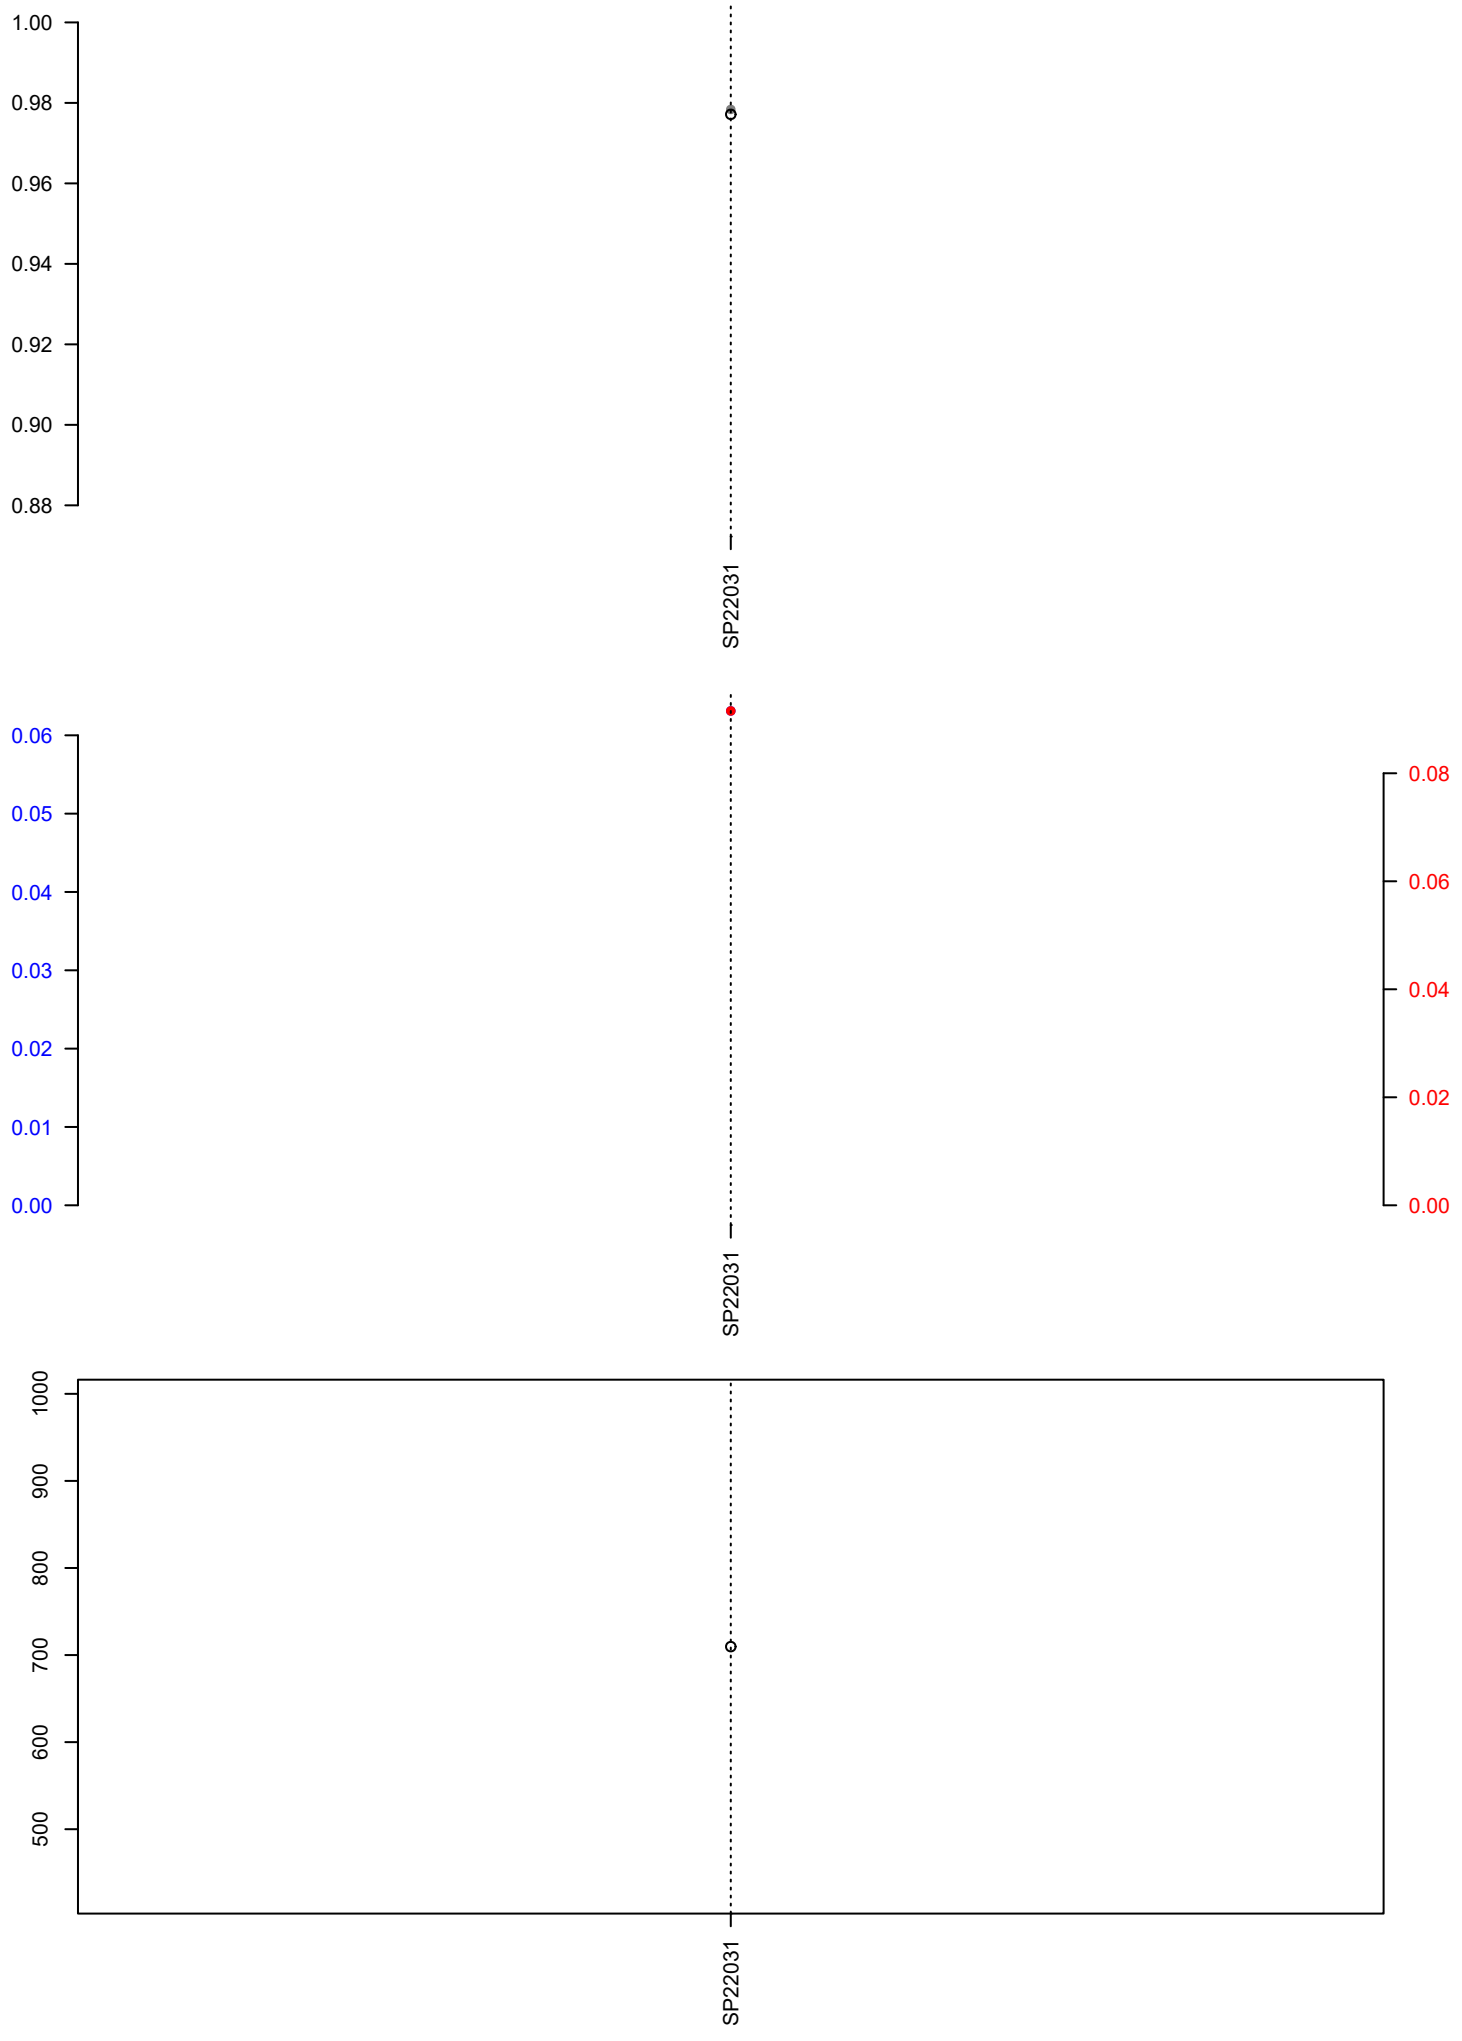

Supplement: Supplemental_Data_S2.zip [file SP22031.reconstruction.err.pdf › Supplemental_Data_S2/mSigAct_output/SP22031.reconstruction.err.pdf]

**SP80615**

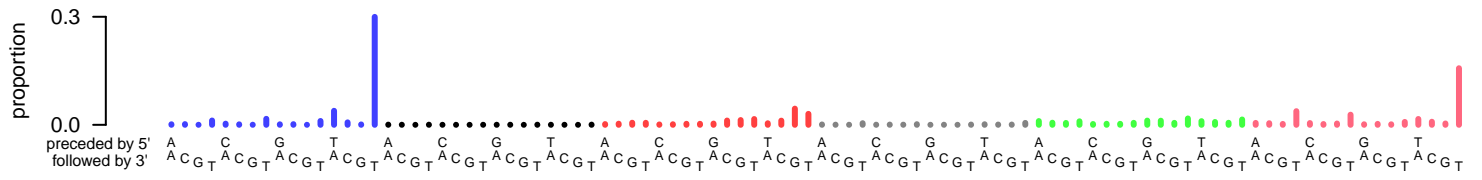

Supplement: Supplemental_Data_S2.zip [file SP80615.check.with.sig.pdf › Supplemental_Data_S2/mSigAct_output/SP80615.check.with.sig.pdf]

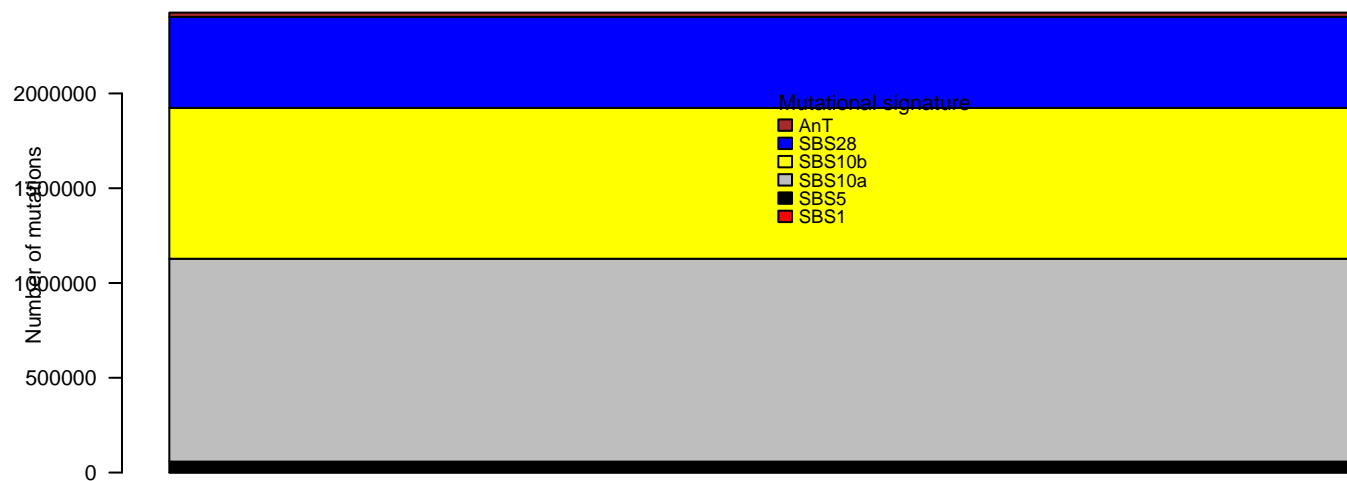

Supplement: Supplemental_Data_S2.zip [file SP80615.exposures.pdf › Supplemental_Data_S2/mSigAct_output/SP80615.exposures.pdf]

**Histogram of out.pvals**

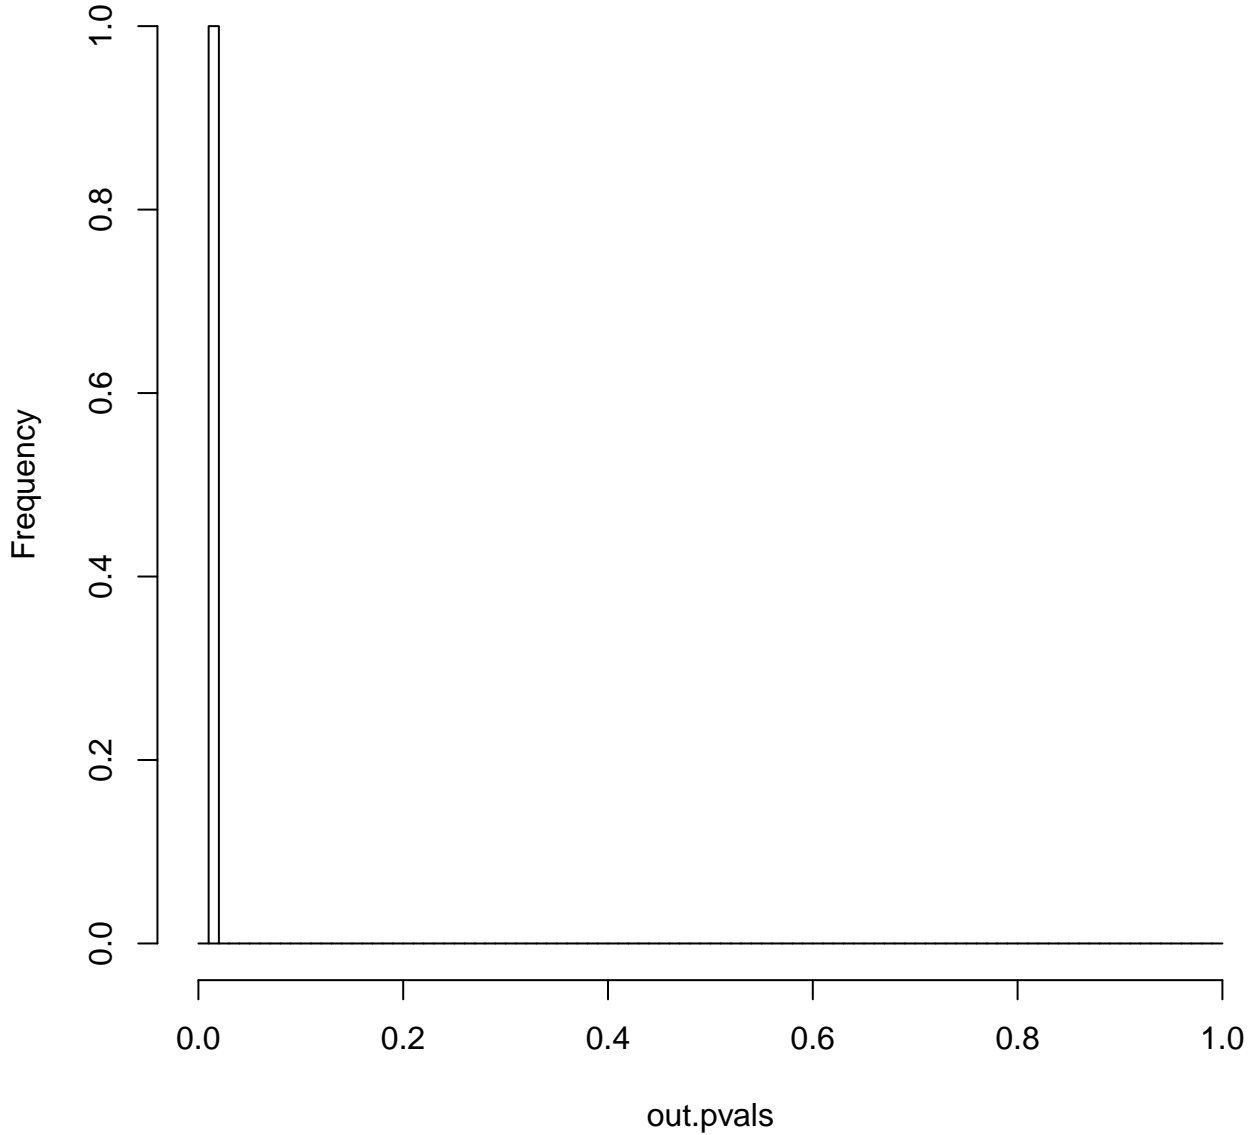

Supplement: Supplemental_Data_S2.zip [file SP80615.pval.histogram.pdf › Supplemental_Data_S2/mSigAct_output/SP80615.pval.histogram.pdf]

Reconstruction error

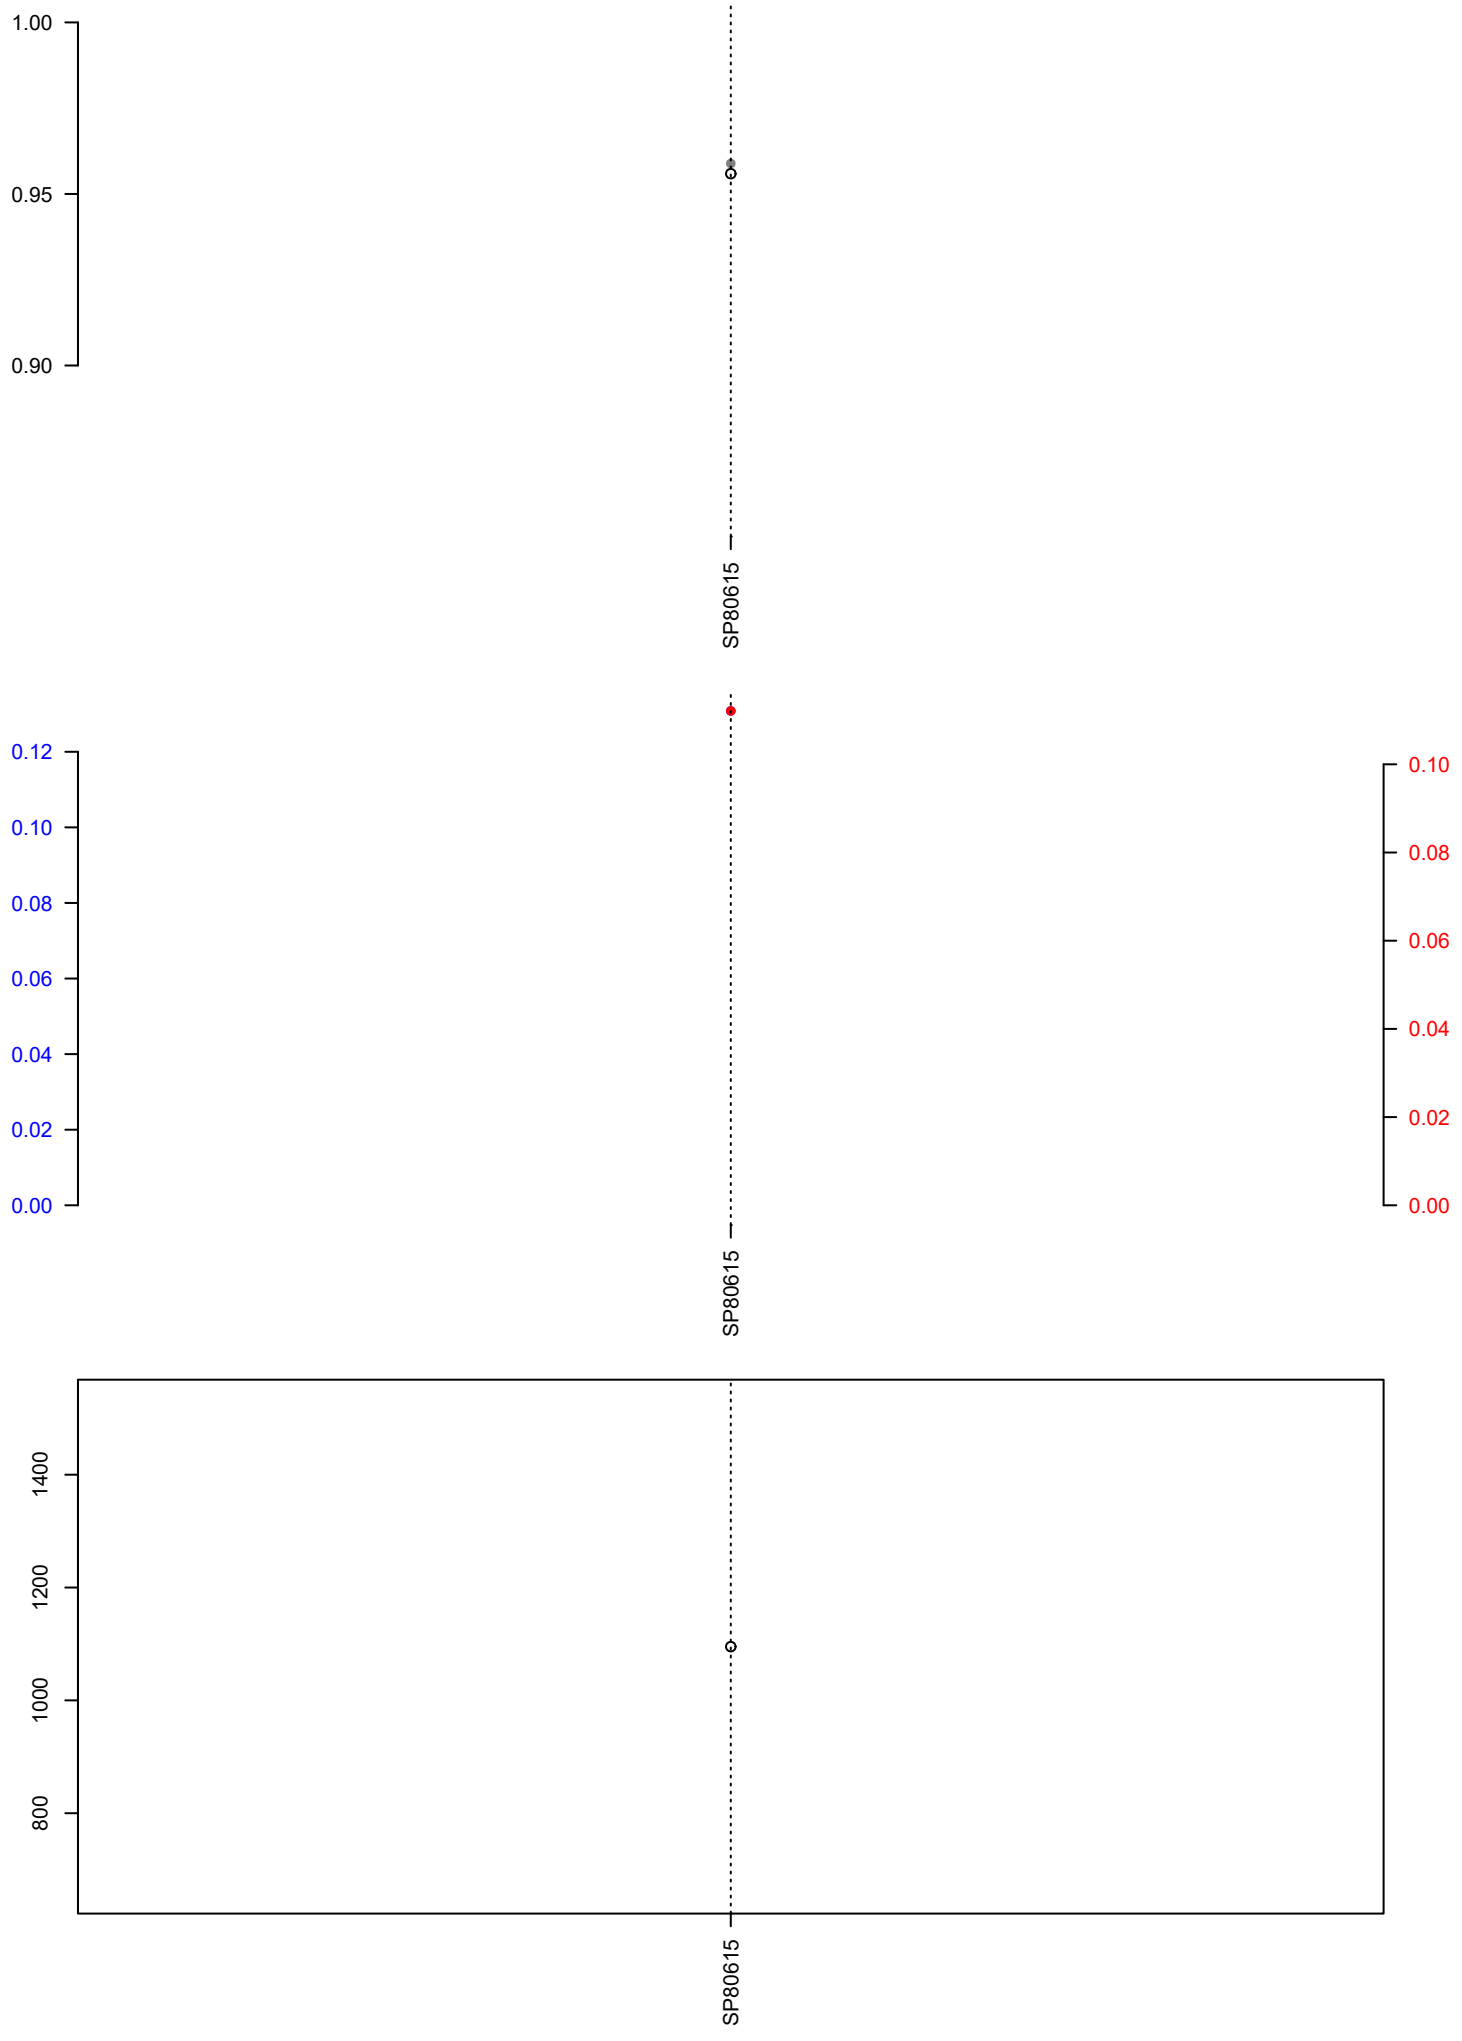

Supplement: Supplemental_Data_S2.zip [file SP80615.reconstruction.err.pdf › Supplemental_Data_S2/mSigAct_output/SP80615.reconstruction.err.pdf]

# SP80754

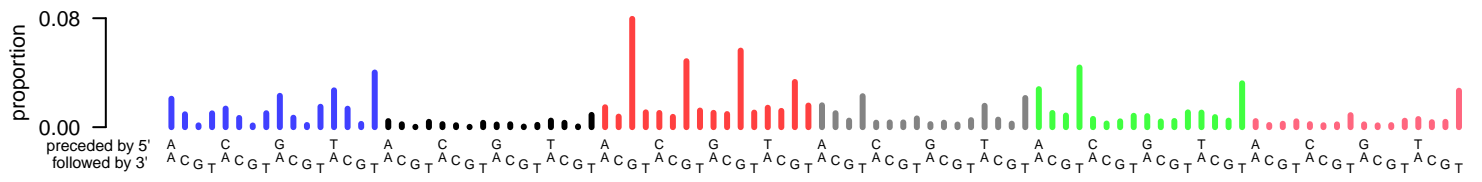

Supplement: Supplemental_Data_S2.zip [file SP80754.check.with.sig.pdf › Supplemental_Data_S2/mSigAct_output/SP80754.check.with.sig.pdf]

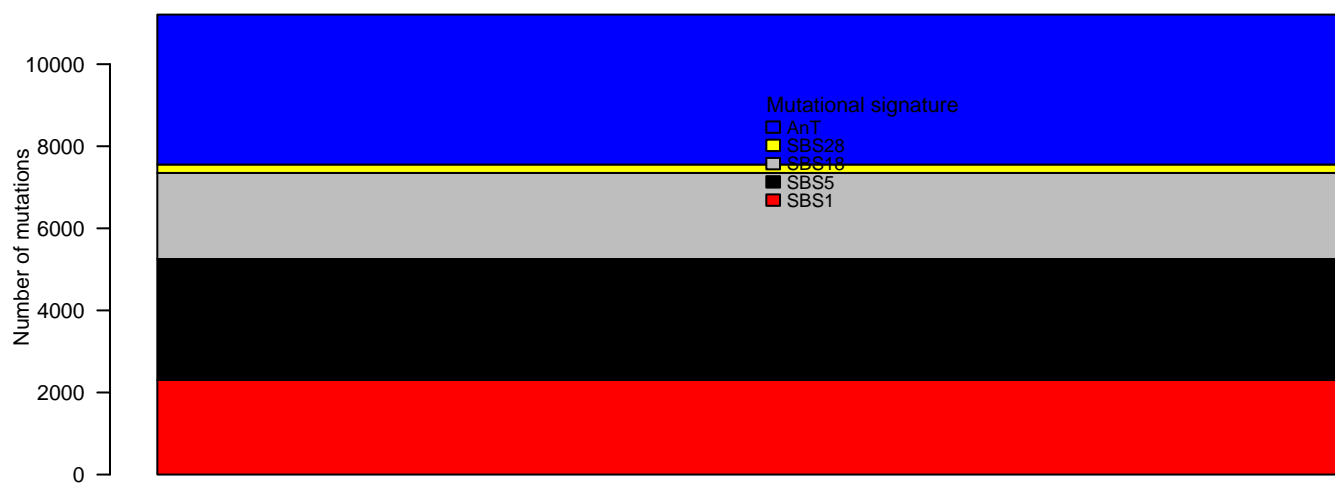

Supplement: Supplemental_Data_S2.zip [file SP80754.exposures.pdf › Supplemental_Data_S2/mSigAct_output/SP80754.exposures.pdf]

**Histogram of out.pvals**



Supplement: Supplemental_Data_S2.zip [file SP80754.pval.histogram.pdf › Supplemental_Data_S2/mSigAct_output/SP80754.pval.histogram.pdf]

Reconstruction error

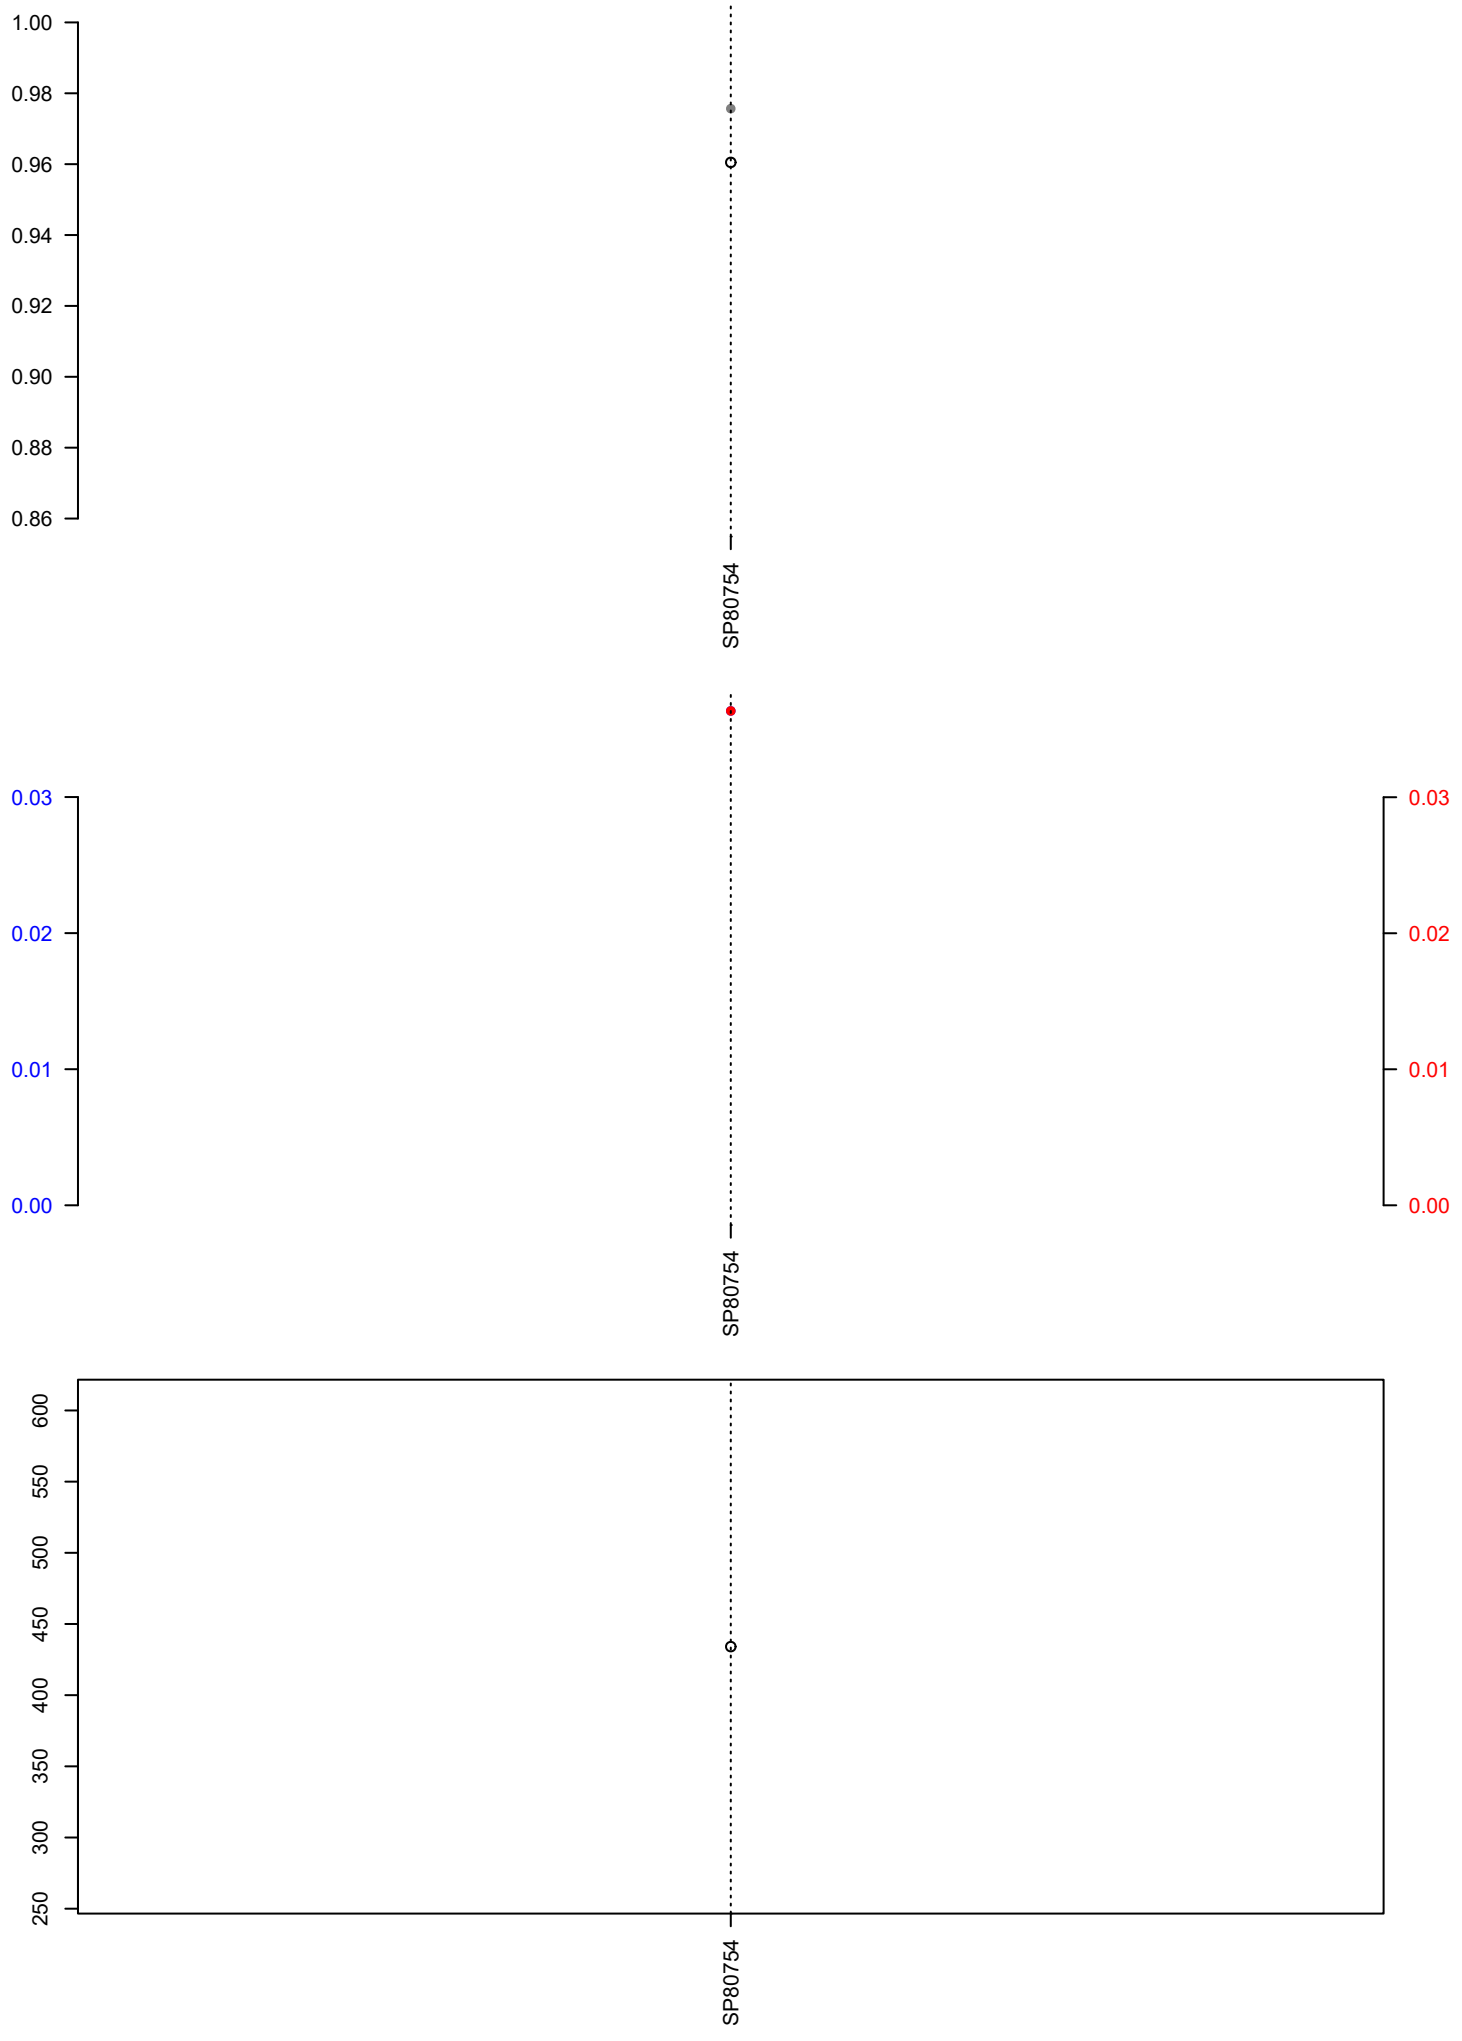

Supplement: Supplemental_Data_S2.zip [file SP80754.reconstruction.err.pdf › Supplemental_Data_S2/mSigAct_output/SP80754.reconstruction.err.pdf]

**SP81494**

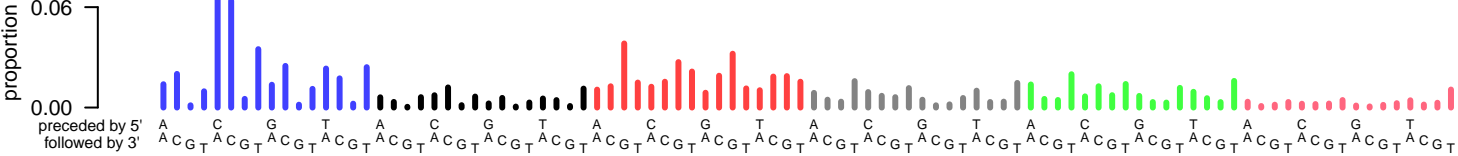

Supplement: Supplemental_Data_S2.zip [file SP81494.check.with.sig.pdf › Supplemental_Data_S2/mSigAct_output/SP81494.check.with.sig.pdf]

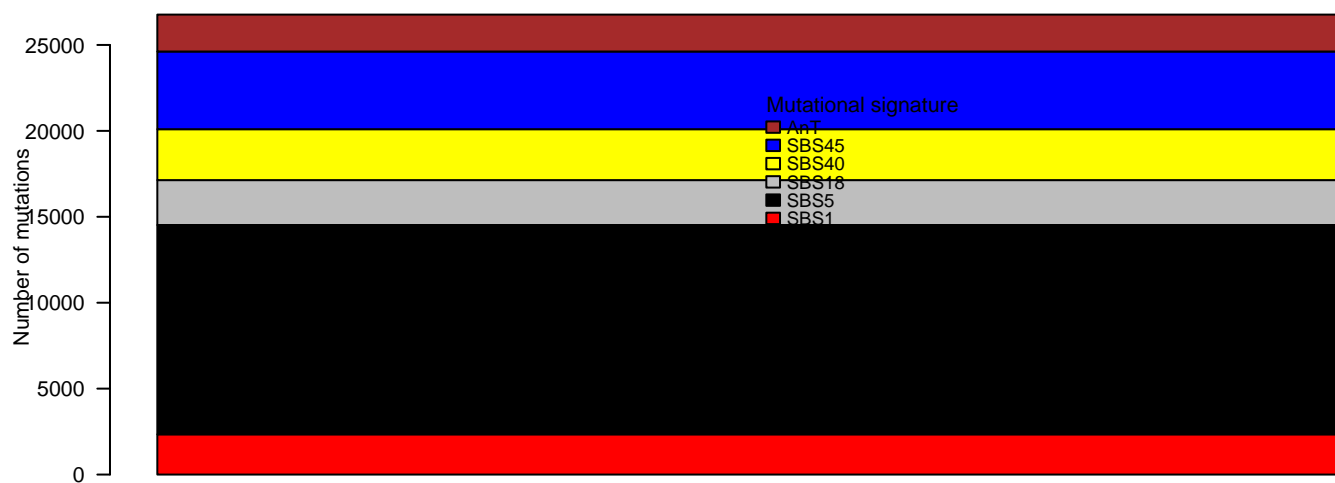

Supplement: Supplemental_Data_S2.zip [file SP81494.exposures.pdf › Supplemental_Data_S2/mSigAct_output/SP81494.exposures.pdf]

**Histogram of out.pvals**



Supplement: Supplemental_Data_S2.zip [file SP81494.pval.histogram.pdf › Supplemental_Data_S2/mSigAct_output/SP81494.pval.histogram.pdf]

Reconstruction error

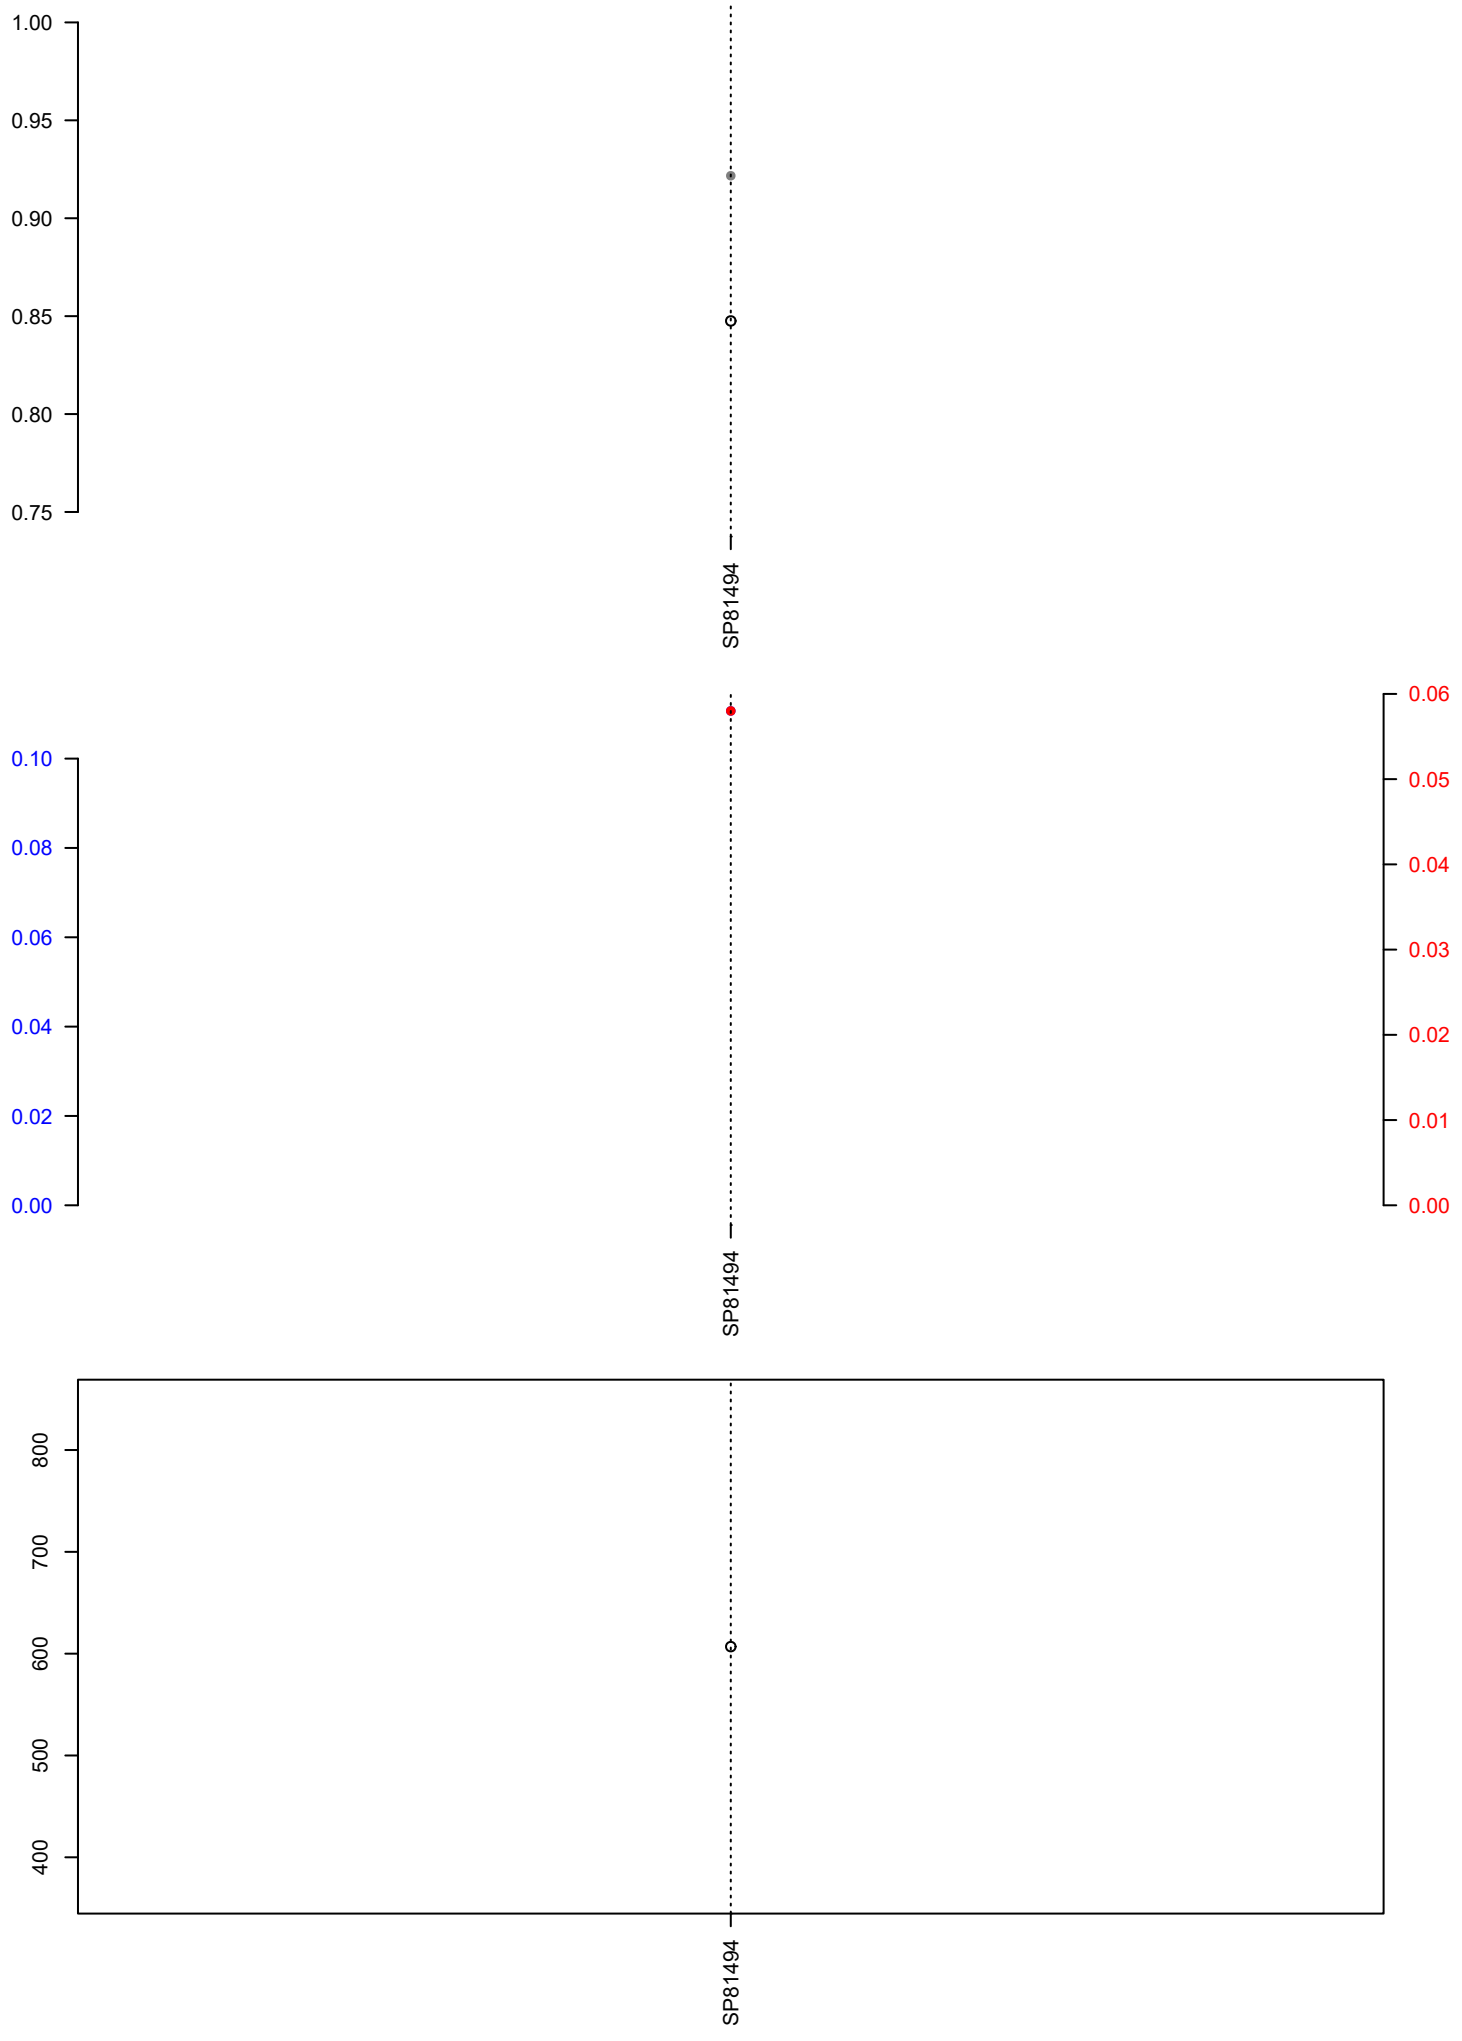

Supplement: Supplemental_Data_S2.zip [file SP81494.reconstruction.err.pdf › Supplemental_Data_S2/mSigAct_output/SP81494.reconstruction.err.pdf]

**SP81711**

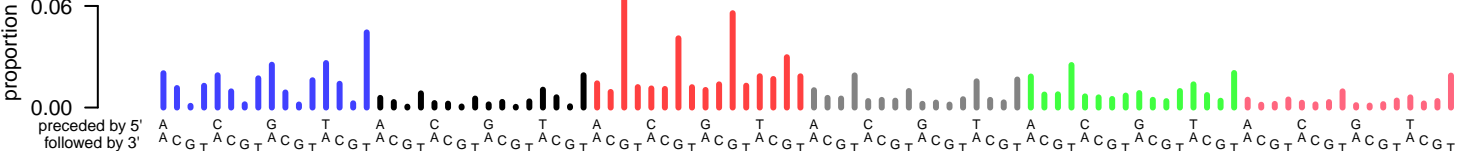

Supplement: Supplemental_Data_S2.zip [file SP81711.check.with.sig.pdf › Supplemental_Data_S2/mSigAct_output/SP81711.check.with.sig.pdf]

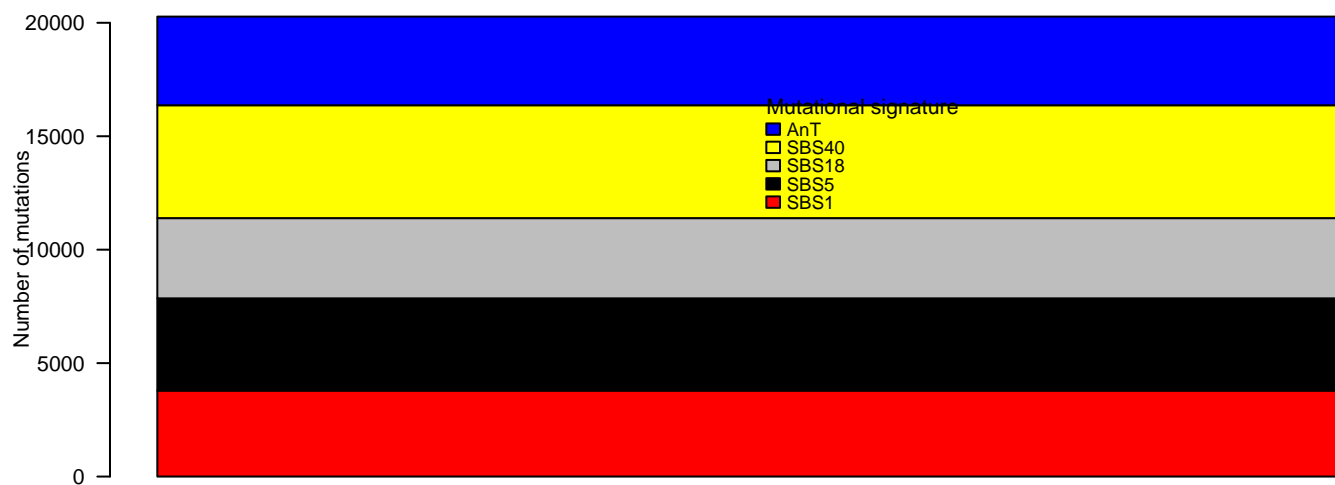

Supplement: Supplemental_Data_S2.zip [file SP81711.exposures.pdf › Supplemental_Data_S2/mSigAct_output/SP81711.exposures.pdf]

**Histogram of out.pvals**



Supplement: Supplemental_Data_S2.zip [file SP81711.pval.histogram.pdf › Supplemental_Data_S2/mSigAct_output/SP81711.pval.histogram.pdf]

Reconstruction error

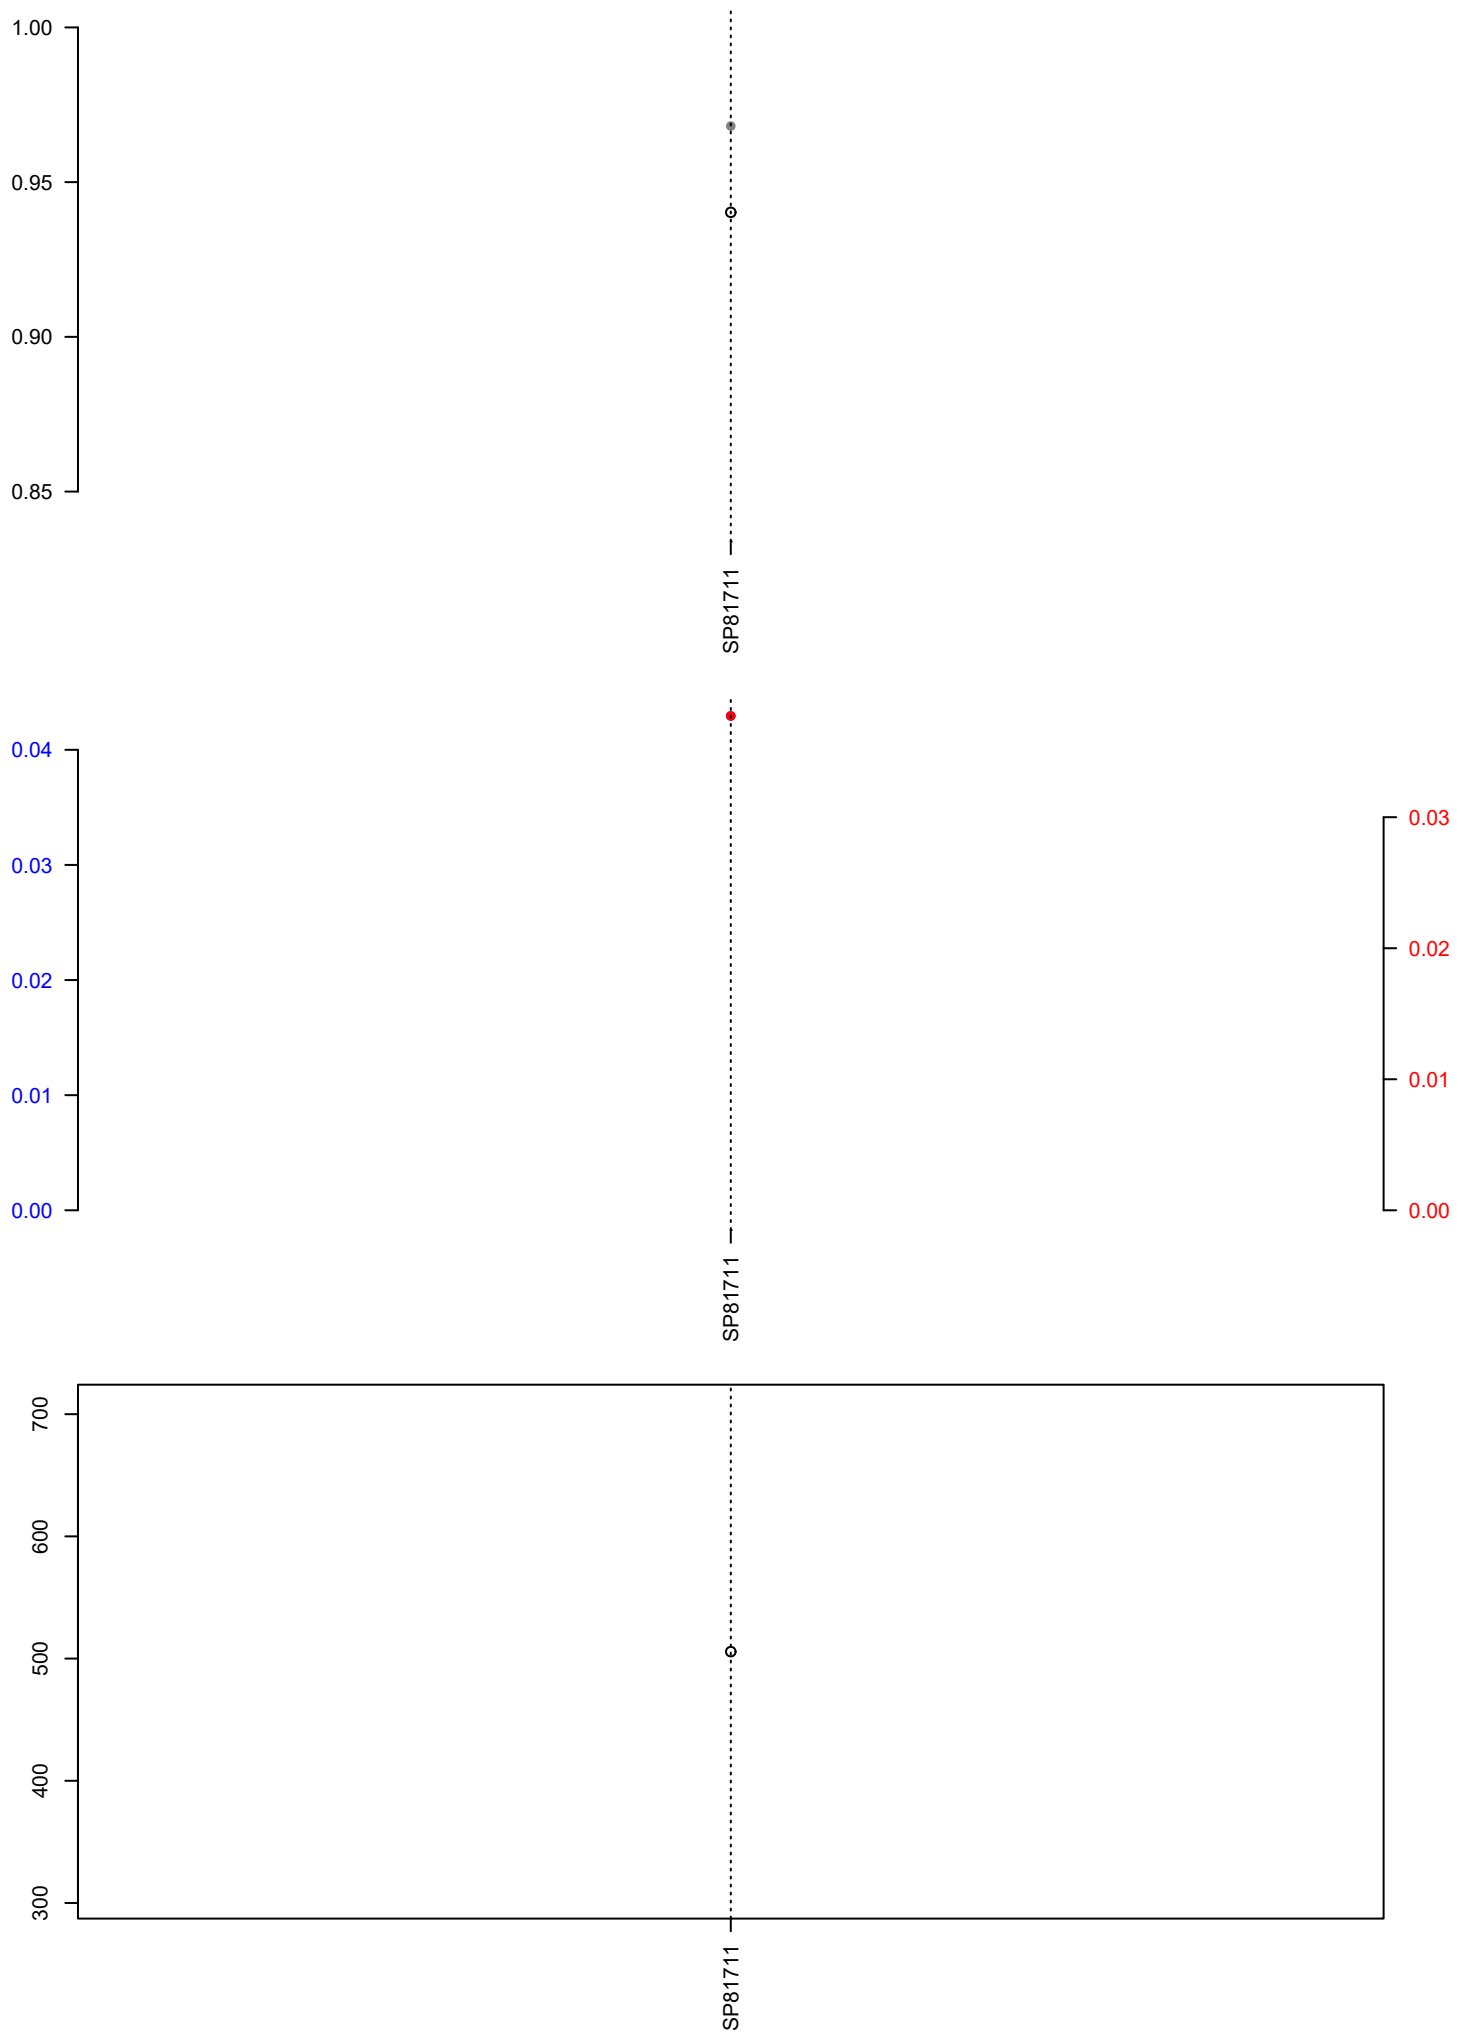

Supplement: Supplemental_Data_S2.zip [file SP81711.reconstruction.err.pdf › Supplemental_Data_S2/mSigAct_output/SP81711.reconstruction.err.pdf]

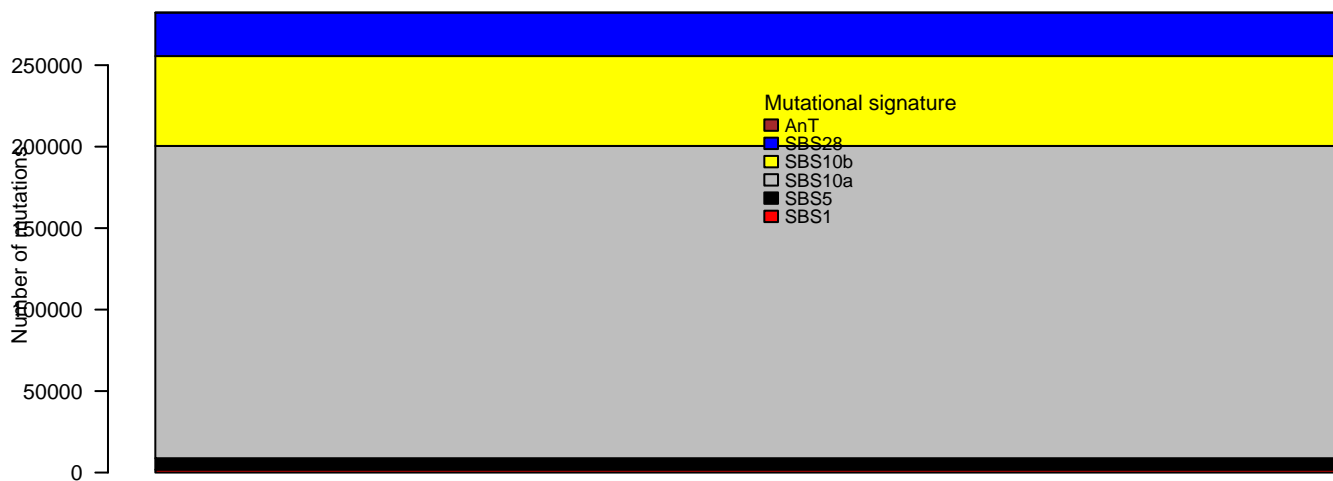

Supplement: Supplemental_Data_S2.zip [file SP92659.exposures.pdf › Supplemental_Data_S2/mSigAct_output/SP92659.exposures.pdf]

**Histogram of out.pvals**



Supplement: Supplemental_Data_S2.zip [file SP92659.pval.histogram.pdf › Supplemental_Data_S2/mSigAct_output/SP92659.pval.histogram.pdf]

Reconstruction error

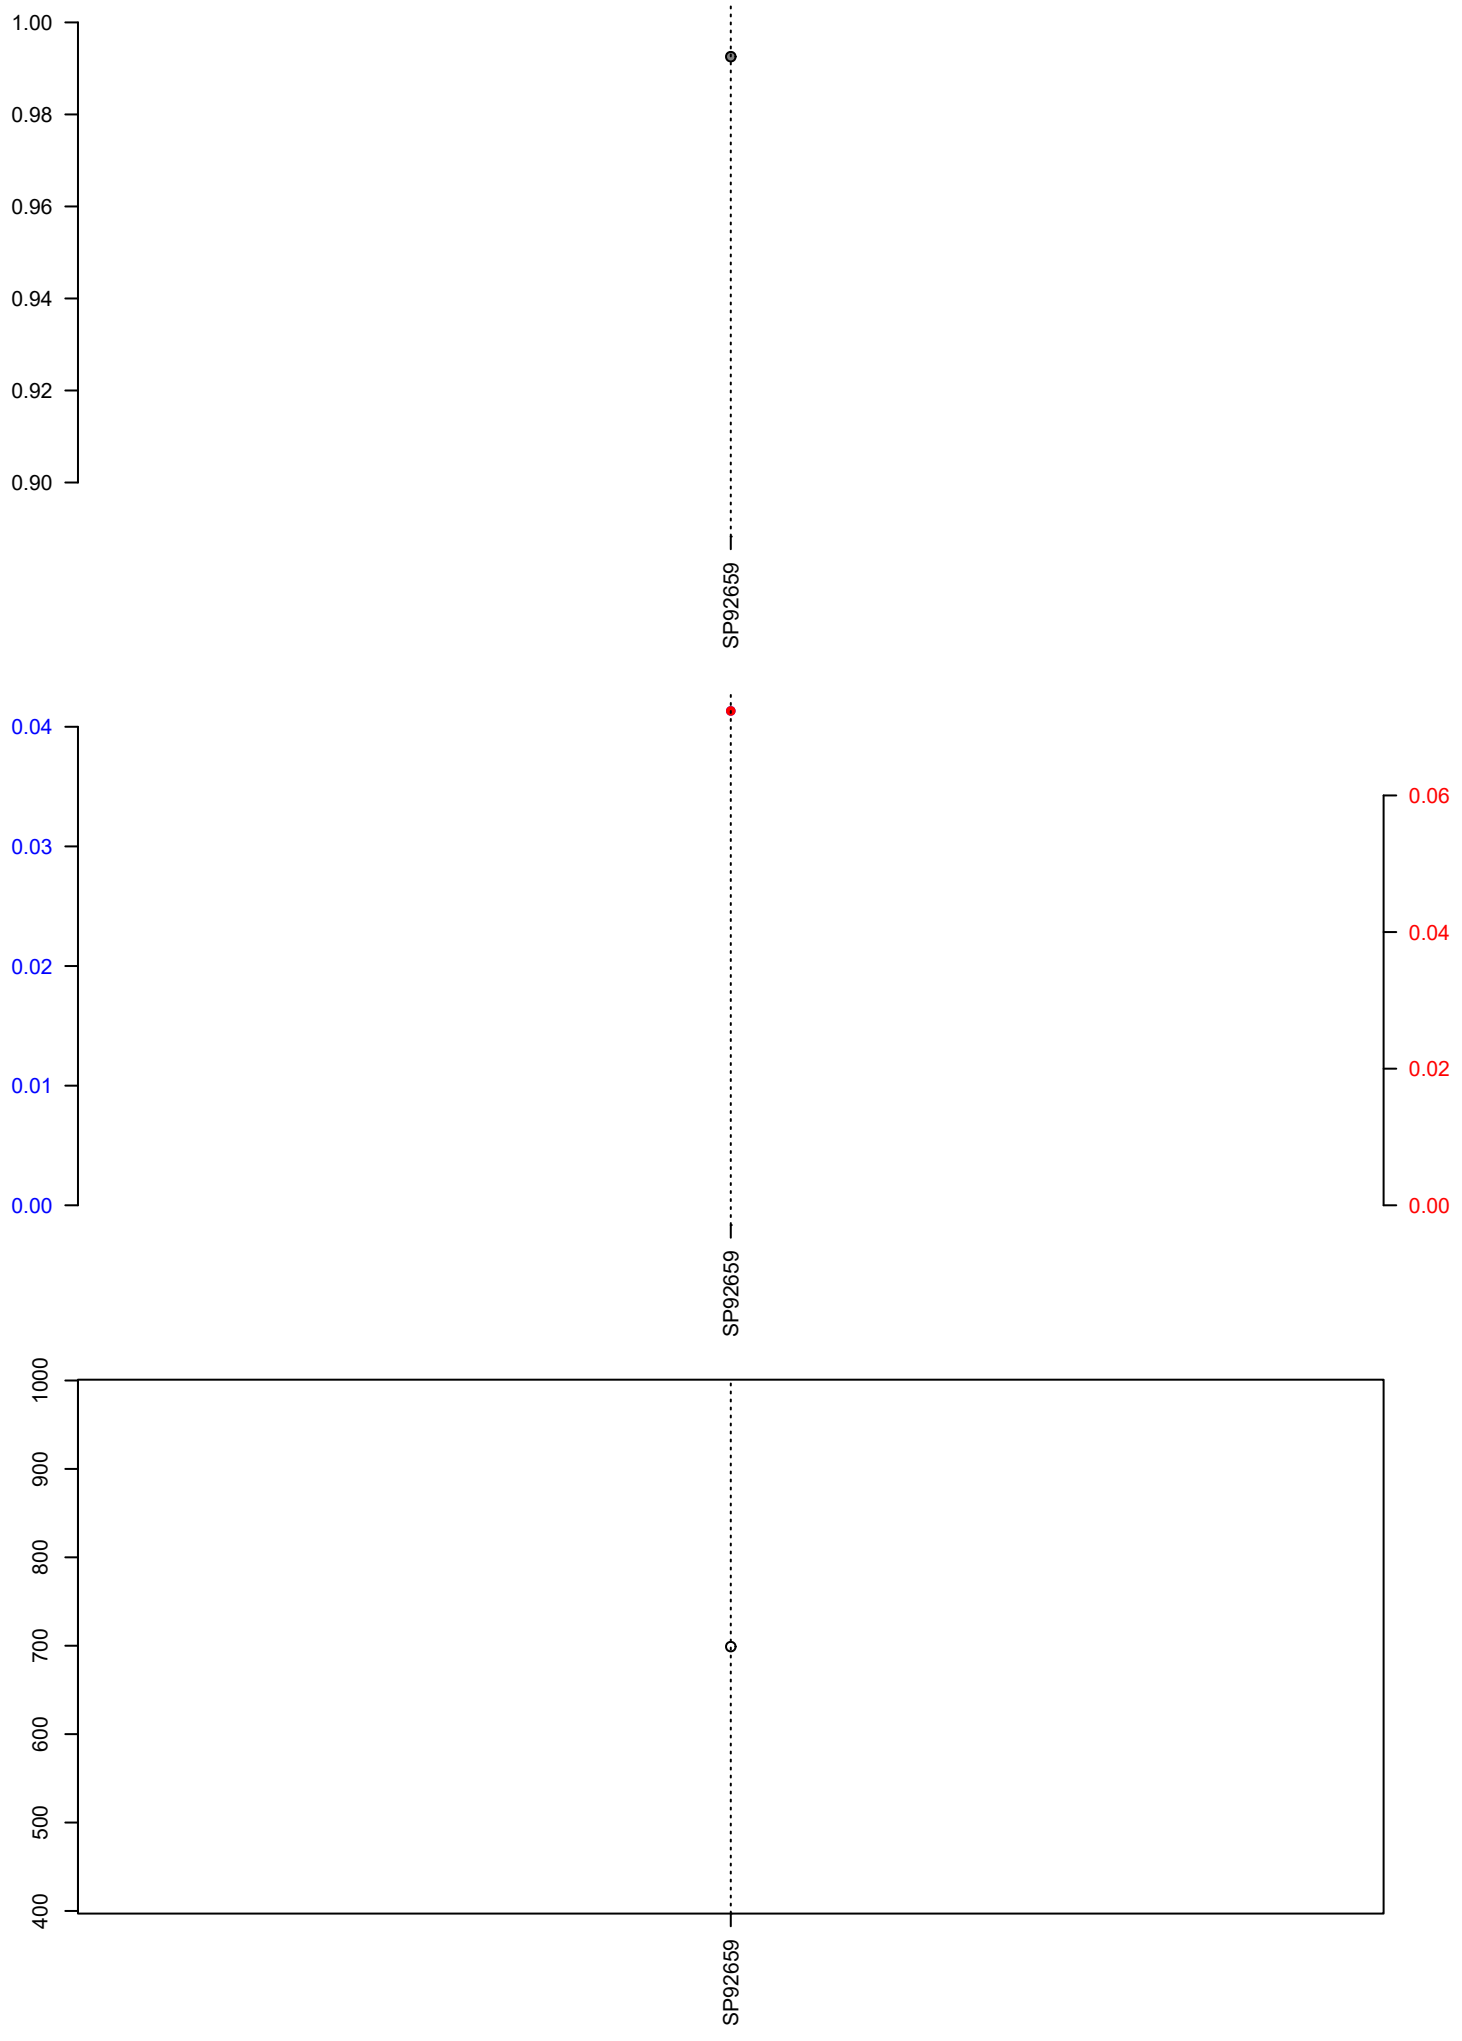

Supplement: Supplemental_Data_S2.zip [file SP92659.reconstruction.err.pdf › Supplemental_Data_S2/mSigAct_output/SP92659.reconstruction.err.pdf]

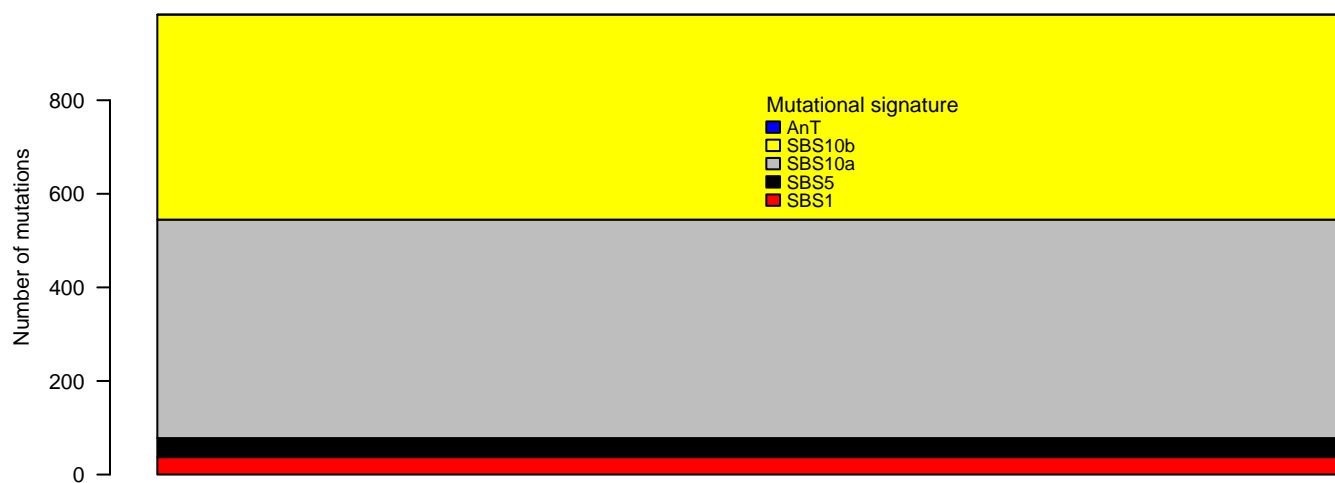

Supplement: Supplemental_Data_S2.zip [file T155.exposures.pdf › Supplemental_Data_S2/mSigAct_output/T155.exposures.pdf]

**Histogram of out.pvals**

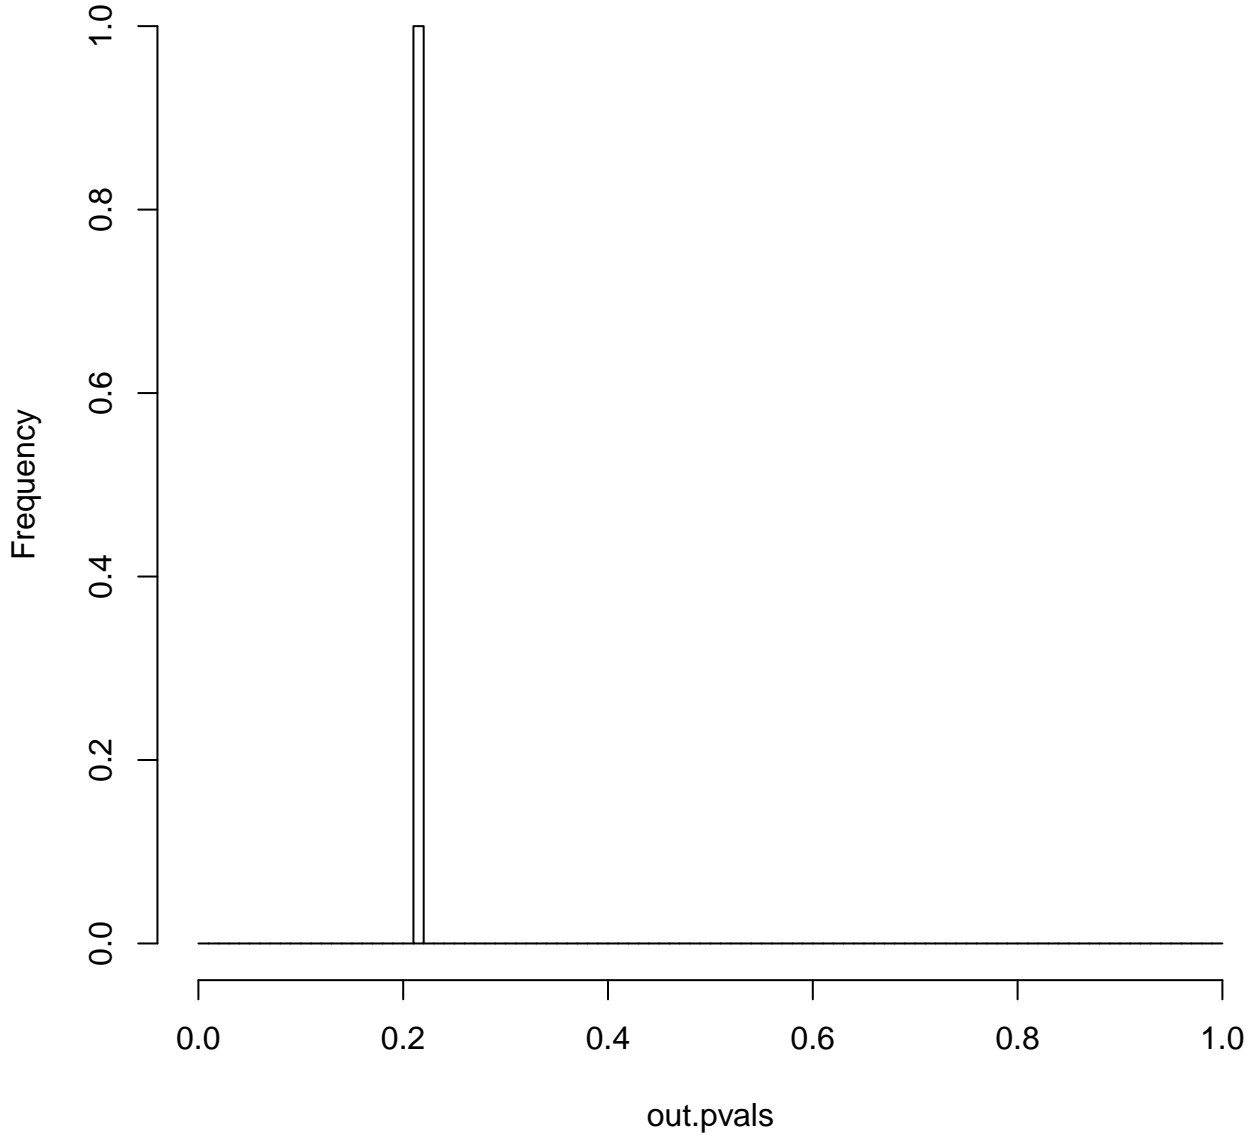

Supplement: Supplemental_Data_S2.zip [file T155.pval.histogram.pdf › Supplemental_Data_S2/mSigAct_output/T155.pval.histogram.pdf]

Reconstruction error

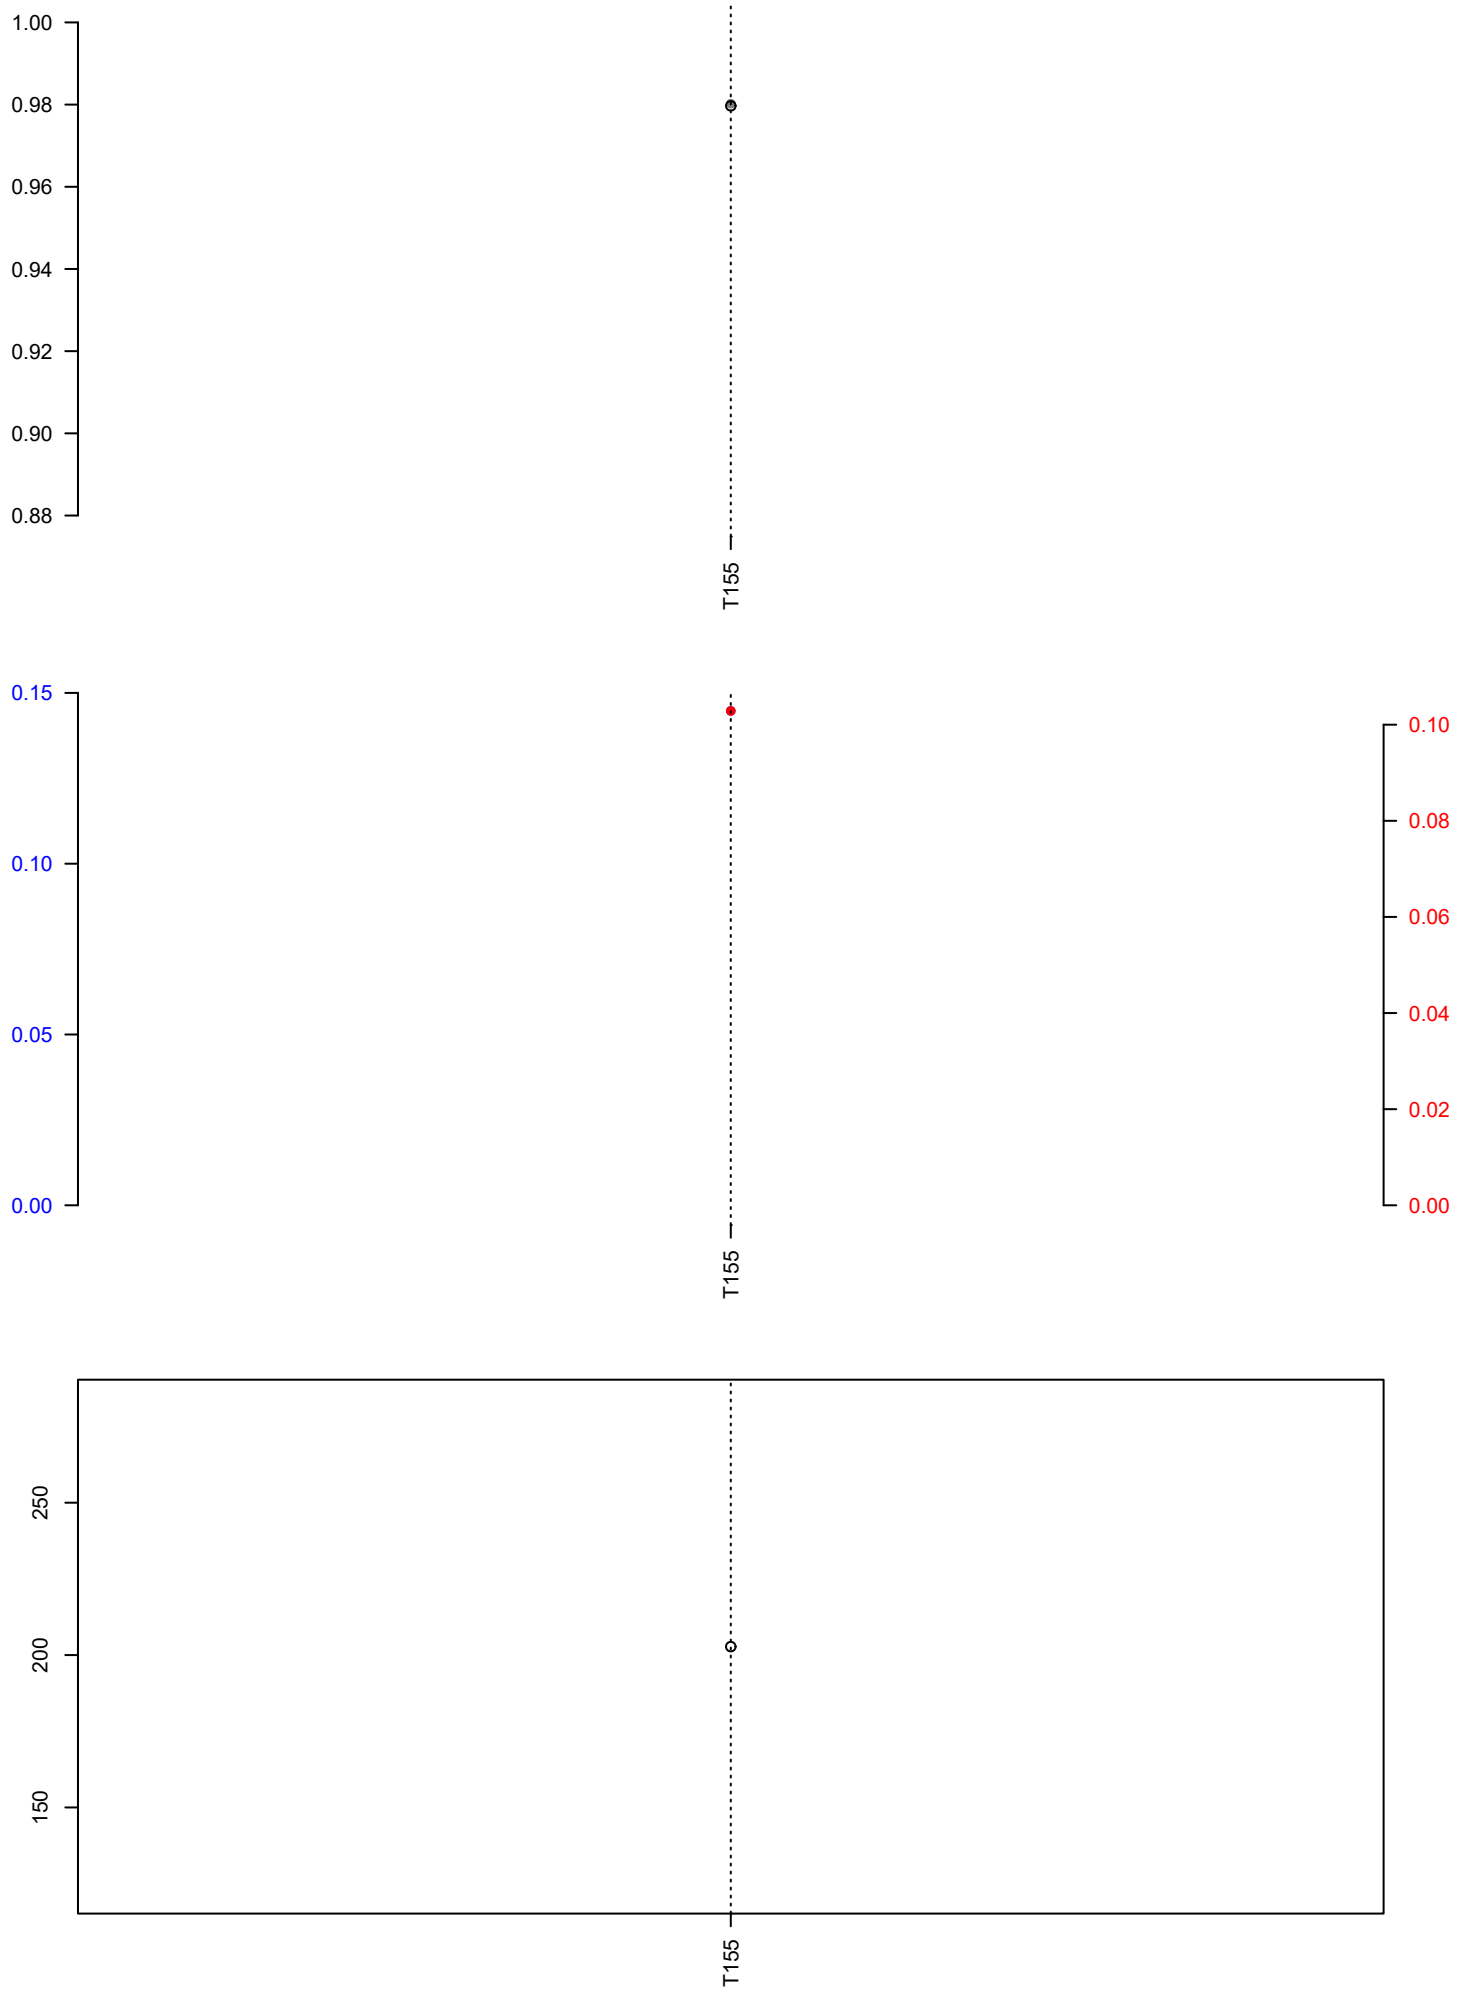

Supplement: Supplemental_Data_S2.zip [file T155.reconstruction.err.pdf › Supplemental_Data_S2/mSigAct_output/T155.reconstruction.err.pdf]

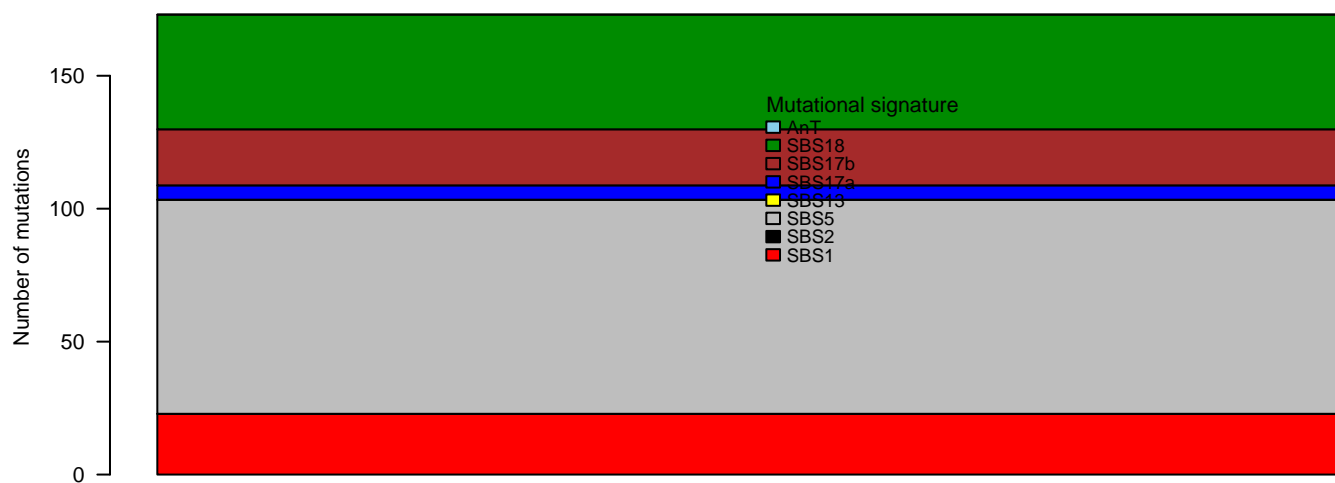

Supplement: Supplemental_Data_S2.zip [file TCGA-2H-A9GM-01A-11D-A37C-09.exposures.pdf › Supplemental_Data_S2/mSigAct_output/TCGA-2H-A9GM-01A-11D-A37C-09.exposures.pdf]

**Histogram of out.pvals**

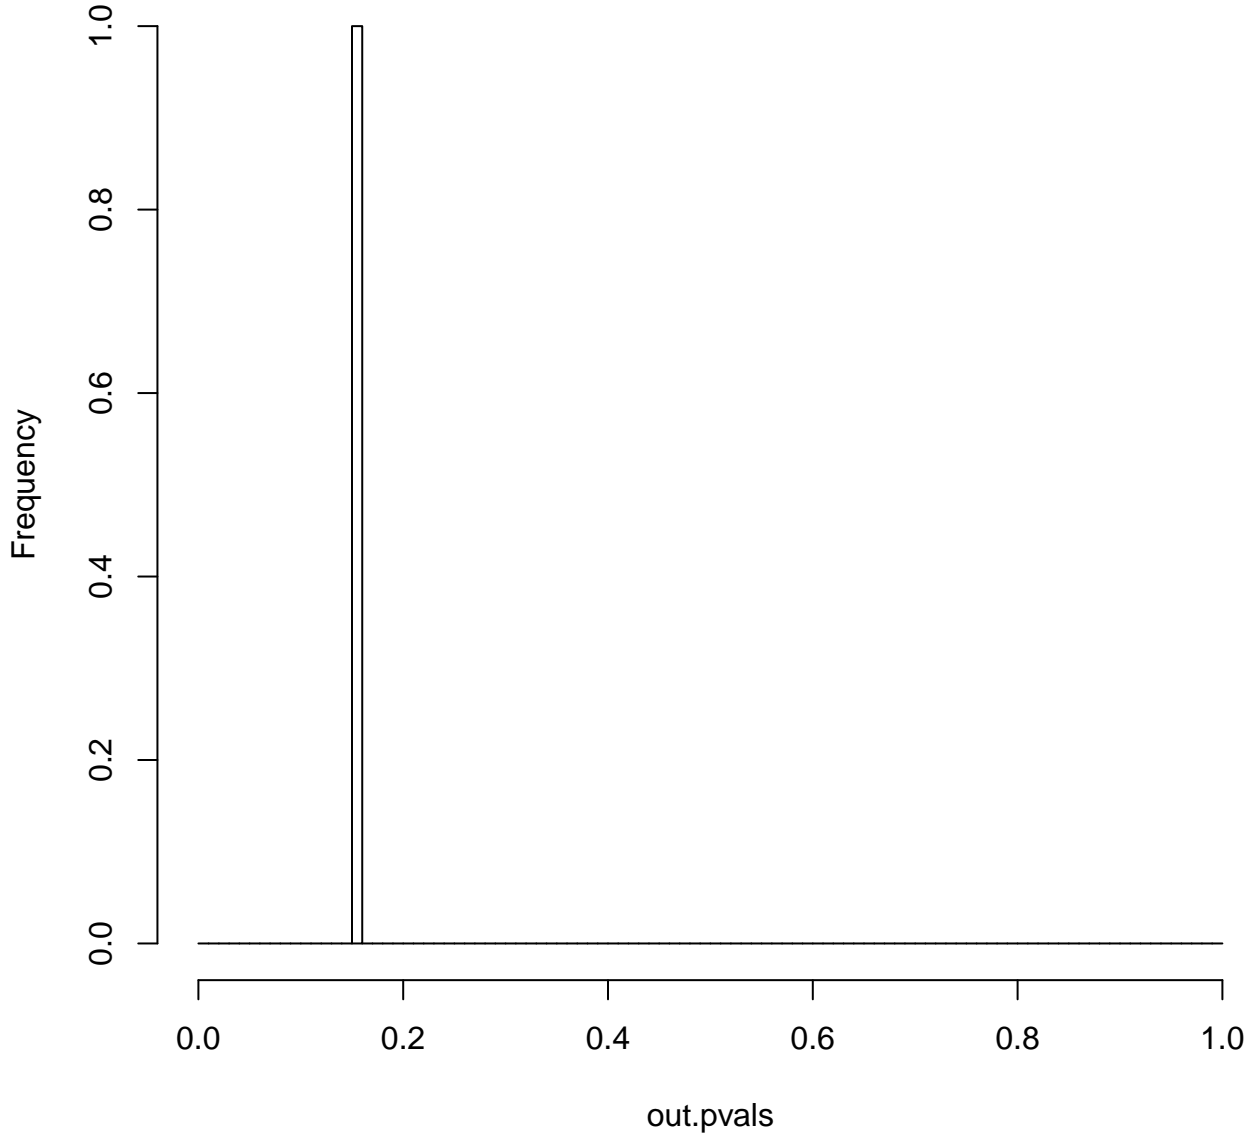

Supplement: Supplemental_Data_S2.zip [file TCGA-2H-A9GM-01A-11D-A37C-09.pval.histogram.pdf › Supplemental_Data_S2/mSigAct_output/TCGA-2H-A9GM-01A-11D-A37C-09.pval.histogram.pdf]

Reconstruction error

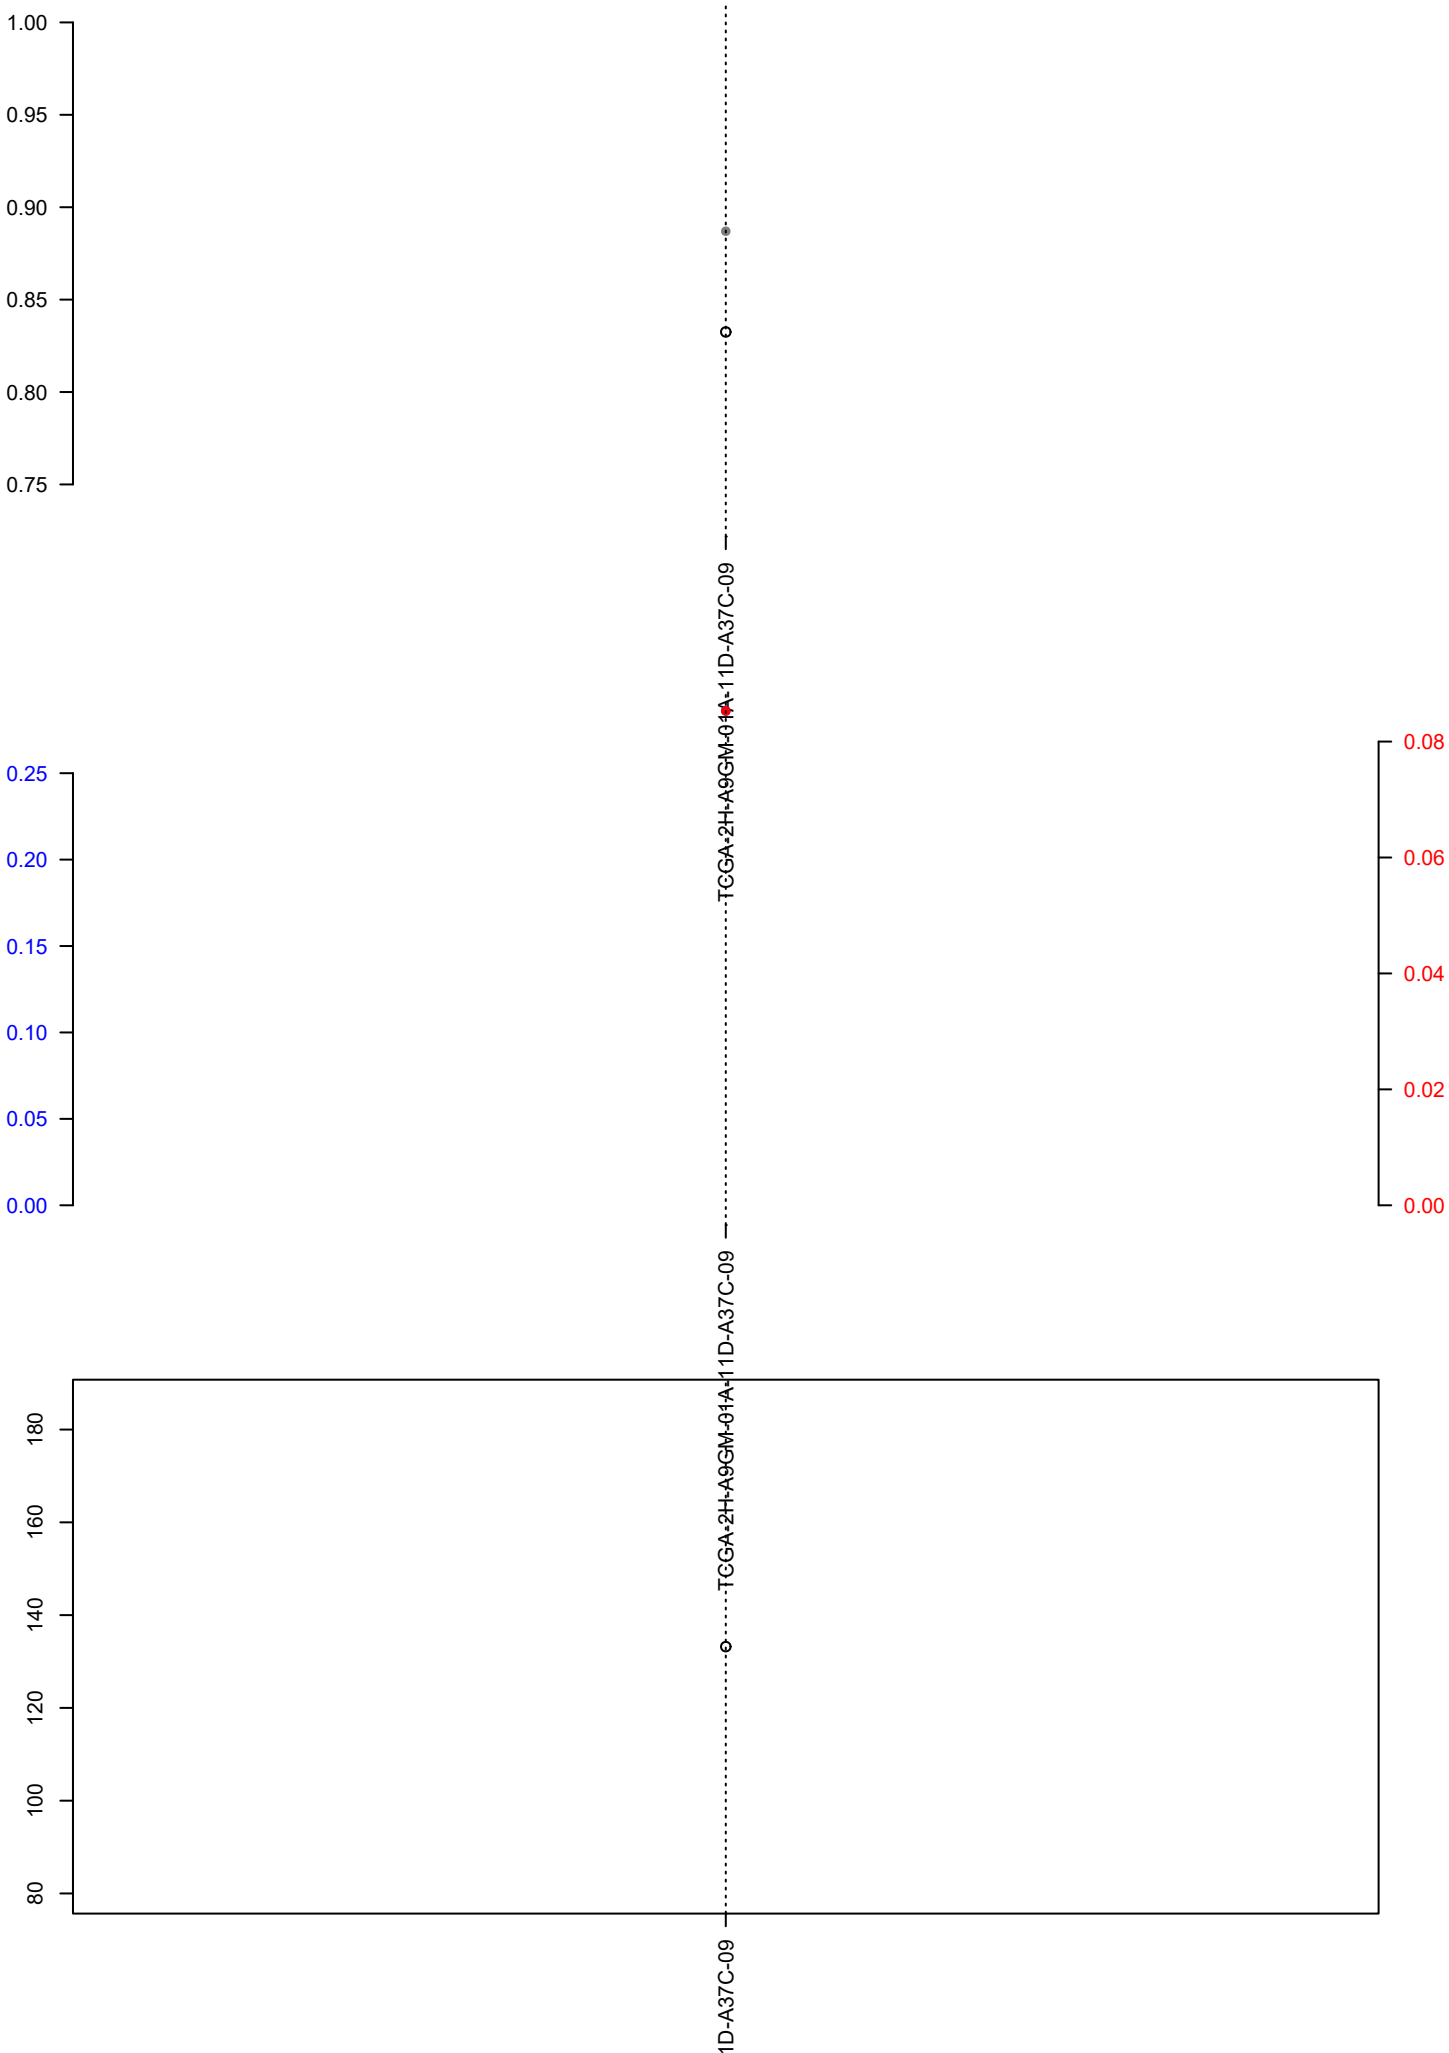

Supplement: Supplemental_Data_S2.zip [file TCGA-2H-A9GM-01A-11D-A37C-09.reconstruction.err.pdf › Supplemental_Data_S2/mSigAct_output/TCGA-2H-A9GM-01A-11D-A37C-09.reconstruction.err.pdf]

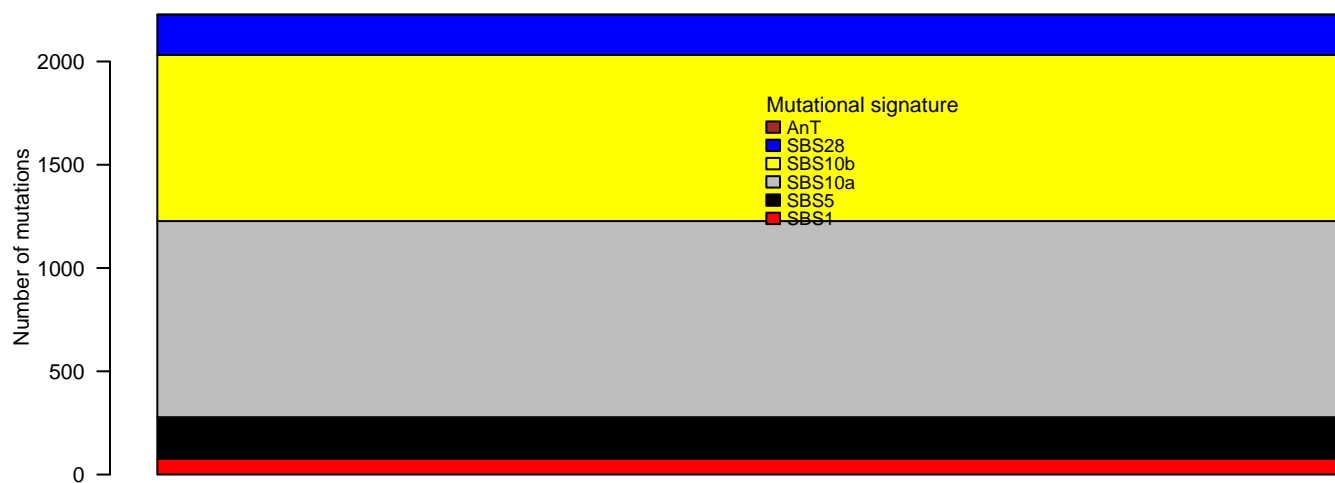

Supplement: Supplemental_Data_S2.zip [file TCGA-A5-A0GP-01A-11W-A062-09.exposures.pdf › Supplemental_Data_S2/mSigAct_output/TCGA-A5-A0GP-01A-11W-A062-09.exposures.pdf]

**Histogram of out.pvals**



Supplement: Supplemental_Data_S2.zip [file TCGA-A5-A0GP-01A-11W-A062-09.pval.histogram.pdf › Supplemental_Data_S2/mSigAct_output/TCGA-A5-A0GP-01A-11W-A062-09.pval.histogram.pdf]

Reconstruction error

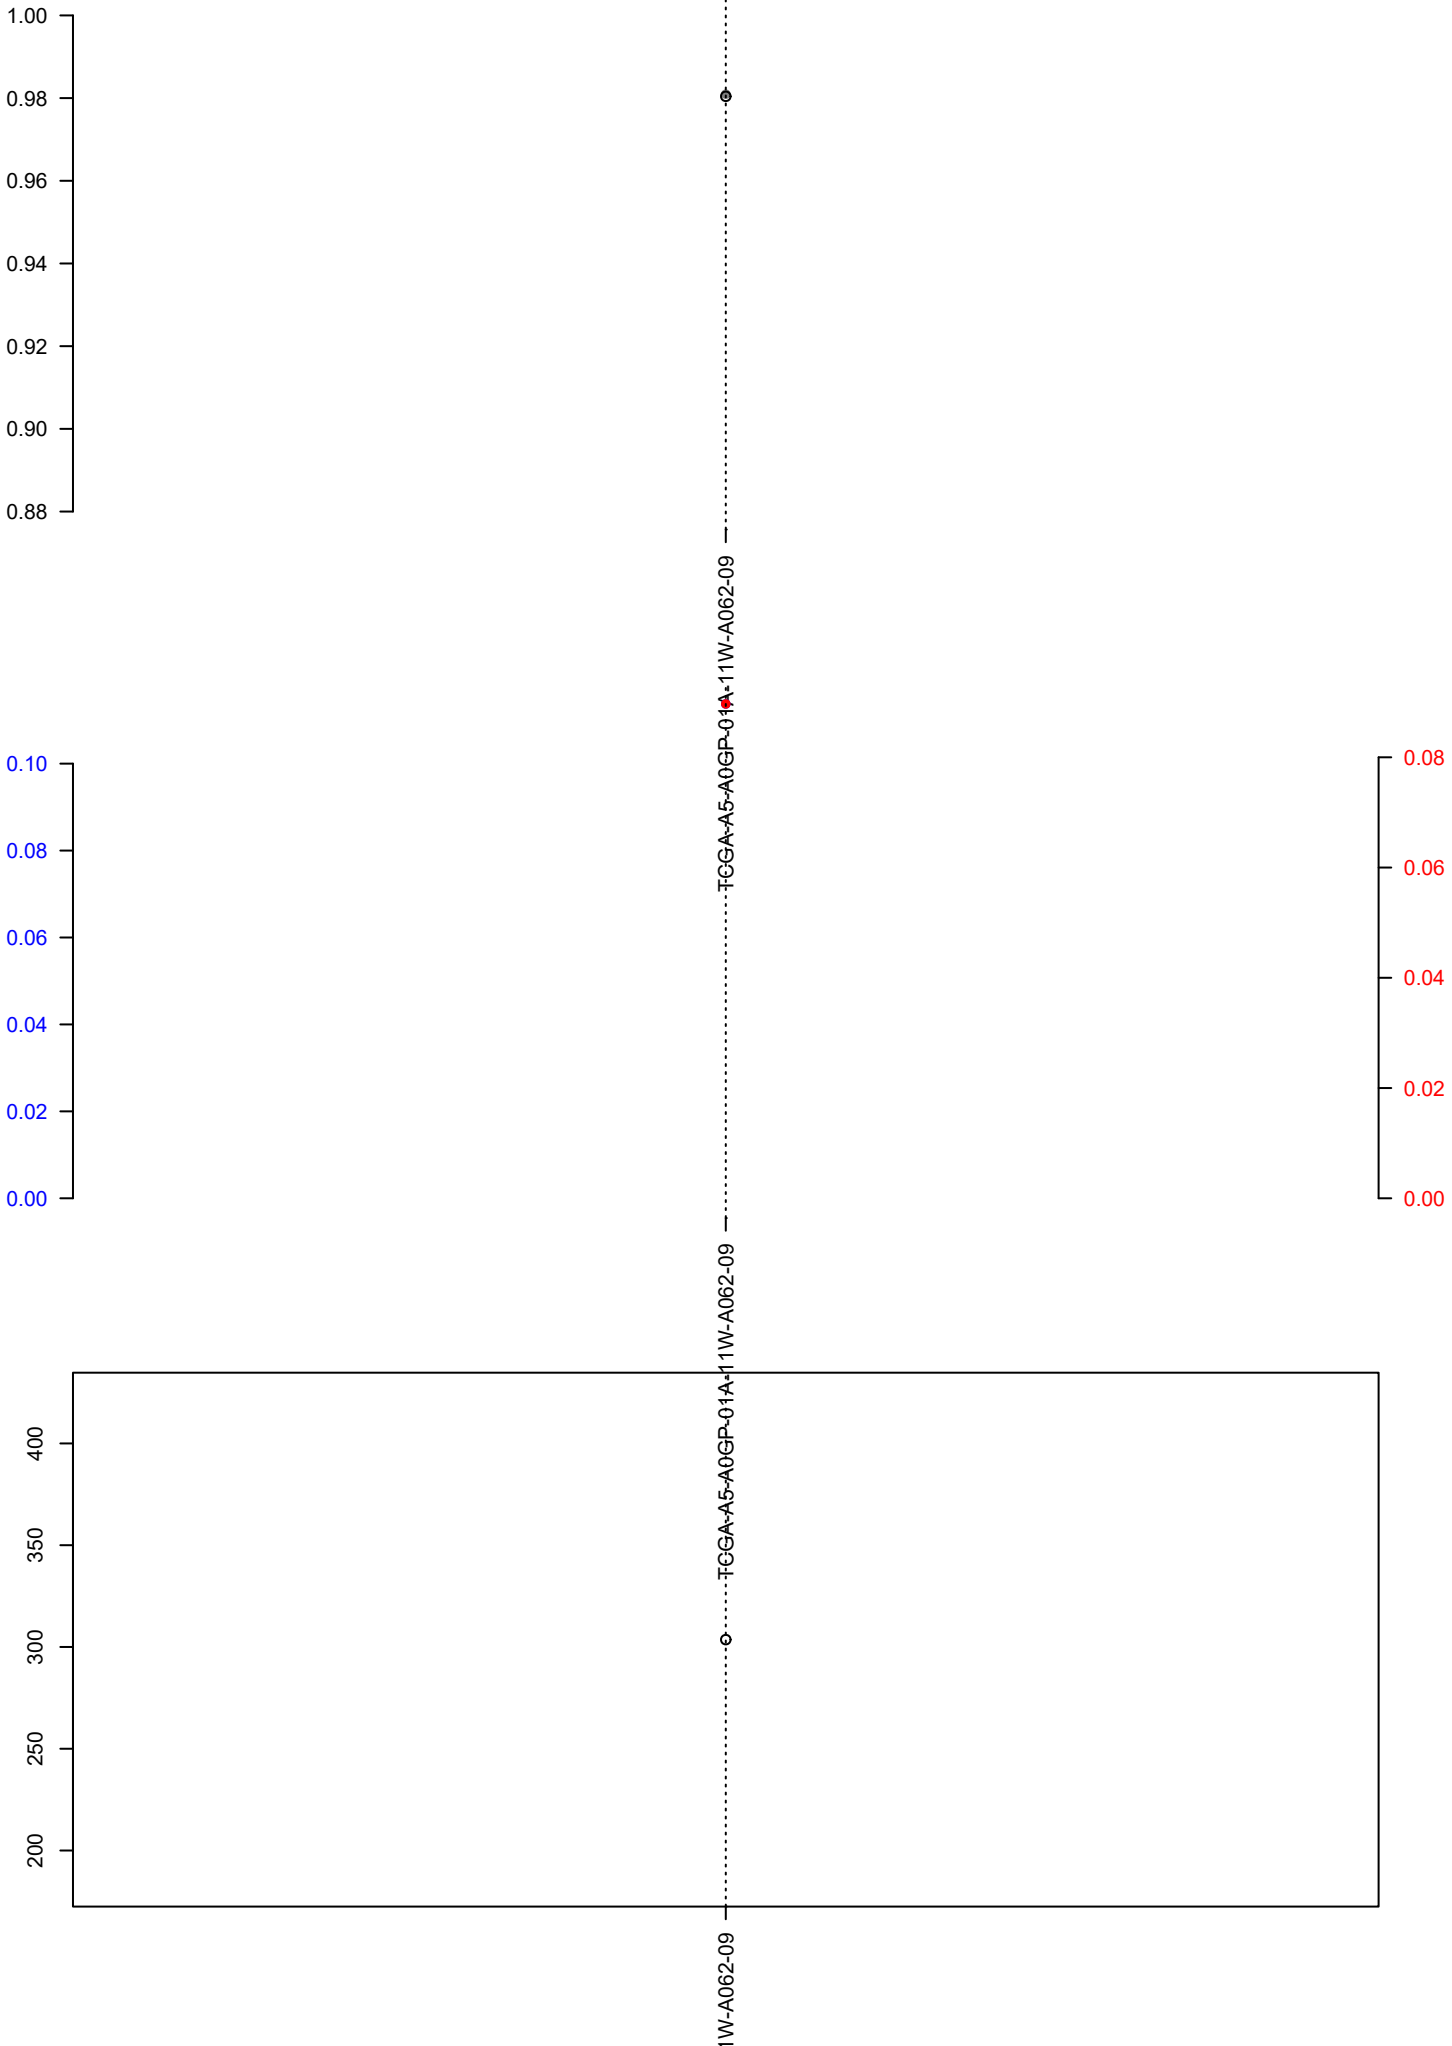

Supplement: Supplemental_Data_S2.zip [file TCGA-A5-A0GP-01A-11W-A062-09.reconstruction.err.pdf › Supplemental_Data_S2/mSigAct_output/TCGA-A5-A0GP-01A-11W-A062-09.reconstruction.err.pdf]

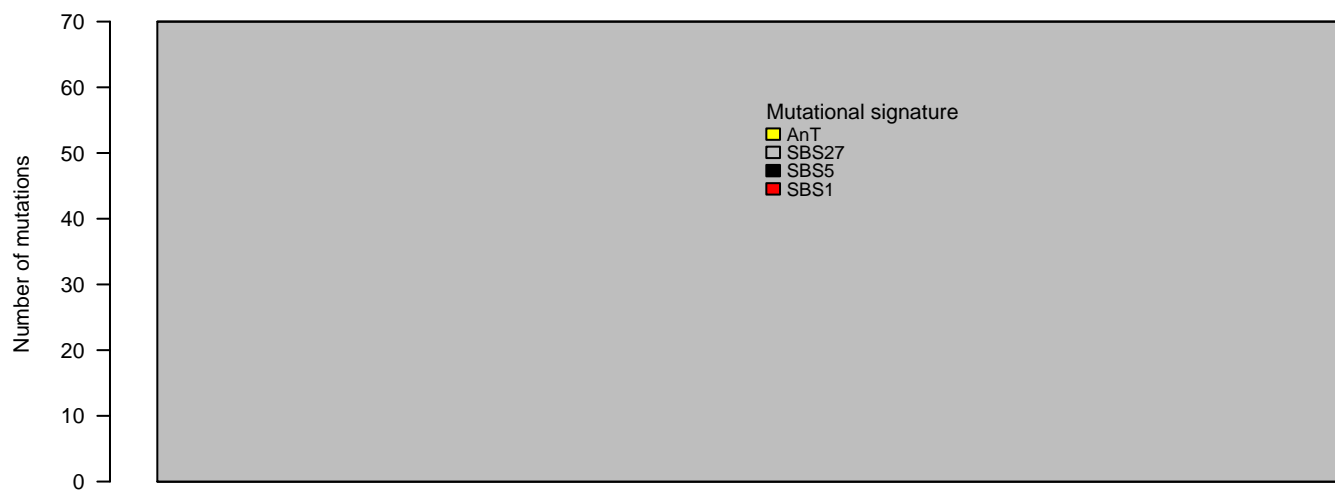

Supplement: Supplemental_Data_S2.zip [file TCGA-AB-2824-03B-01W-0728-08.exposures.pdf › Supplemental_Data_S2/mSigAct_output/TCGA-AB-2824-03B-01W-0728-08.exposures.pdf]

**Histogram of out.pvals**



Supplement: Supplemental_Data_S2.zip [file TCGA-AB-2824-03B-01W-0728-08.pval.histogram.pdf › Supplemental_Data_S2/mSigAct_output/TCGA-AB-2824-03B-01W-0728-08.pval.histogram.pdf]

Reconstruction error

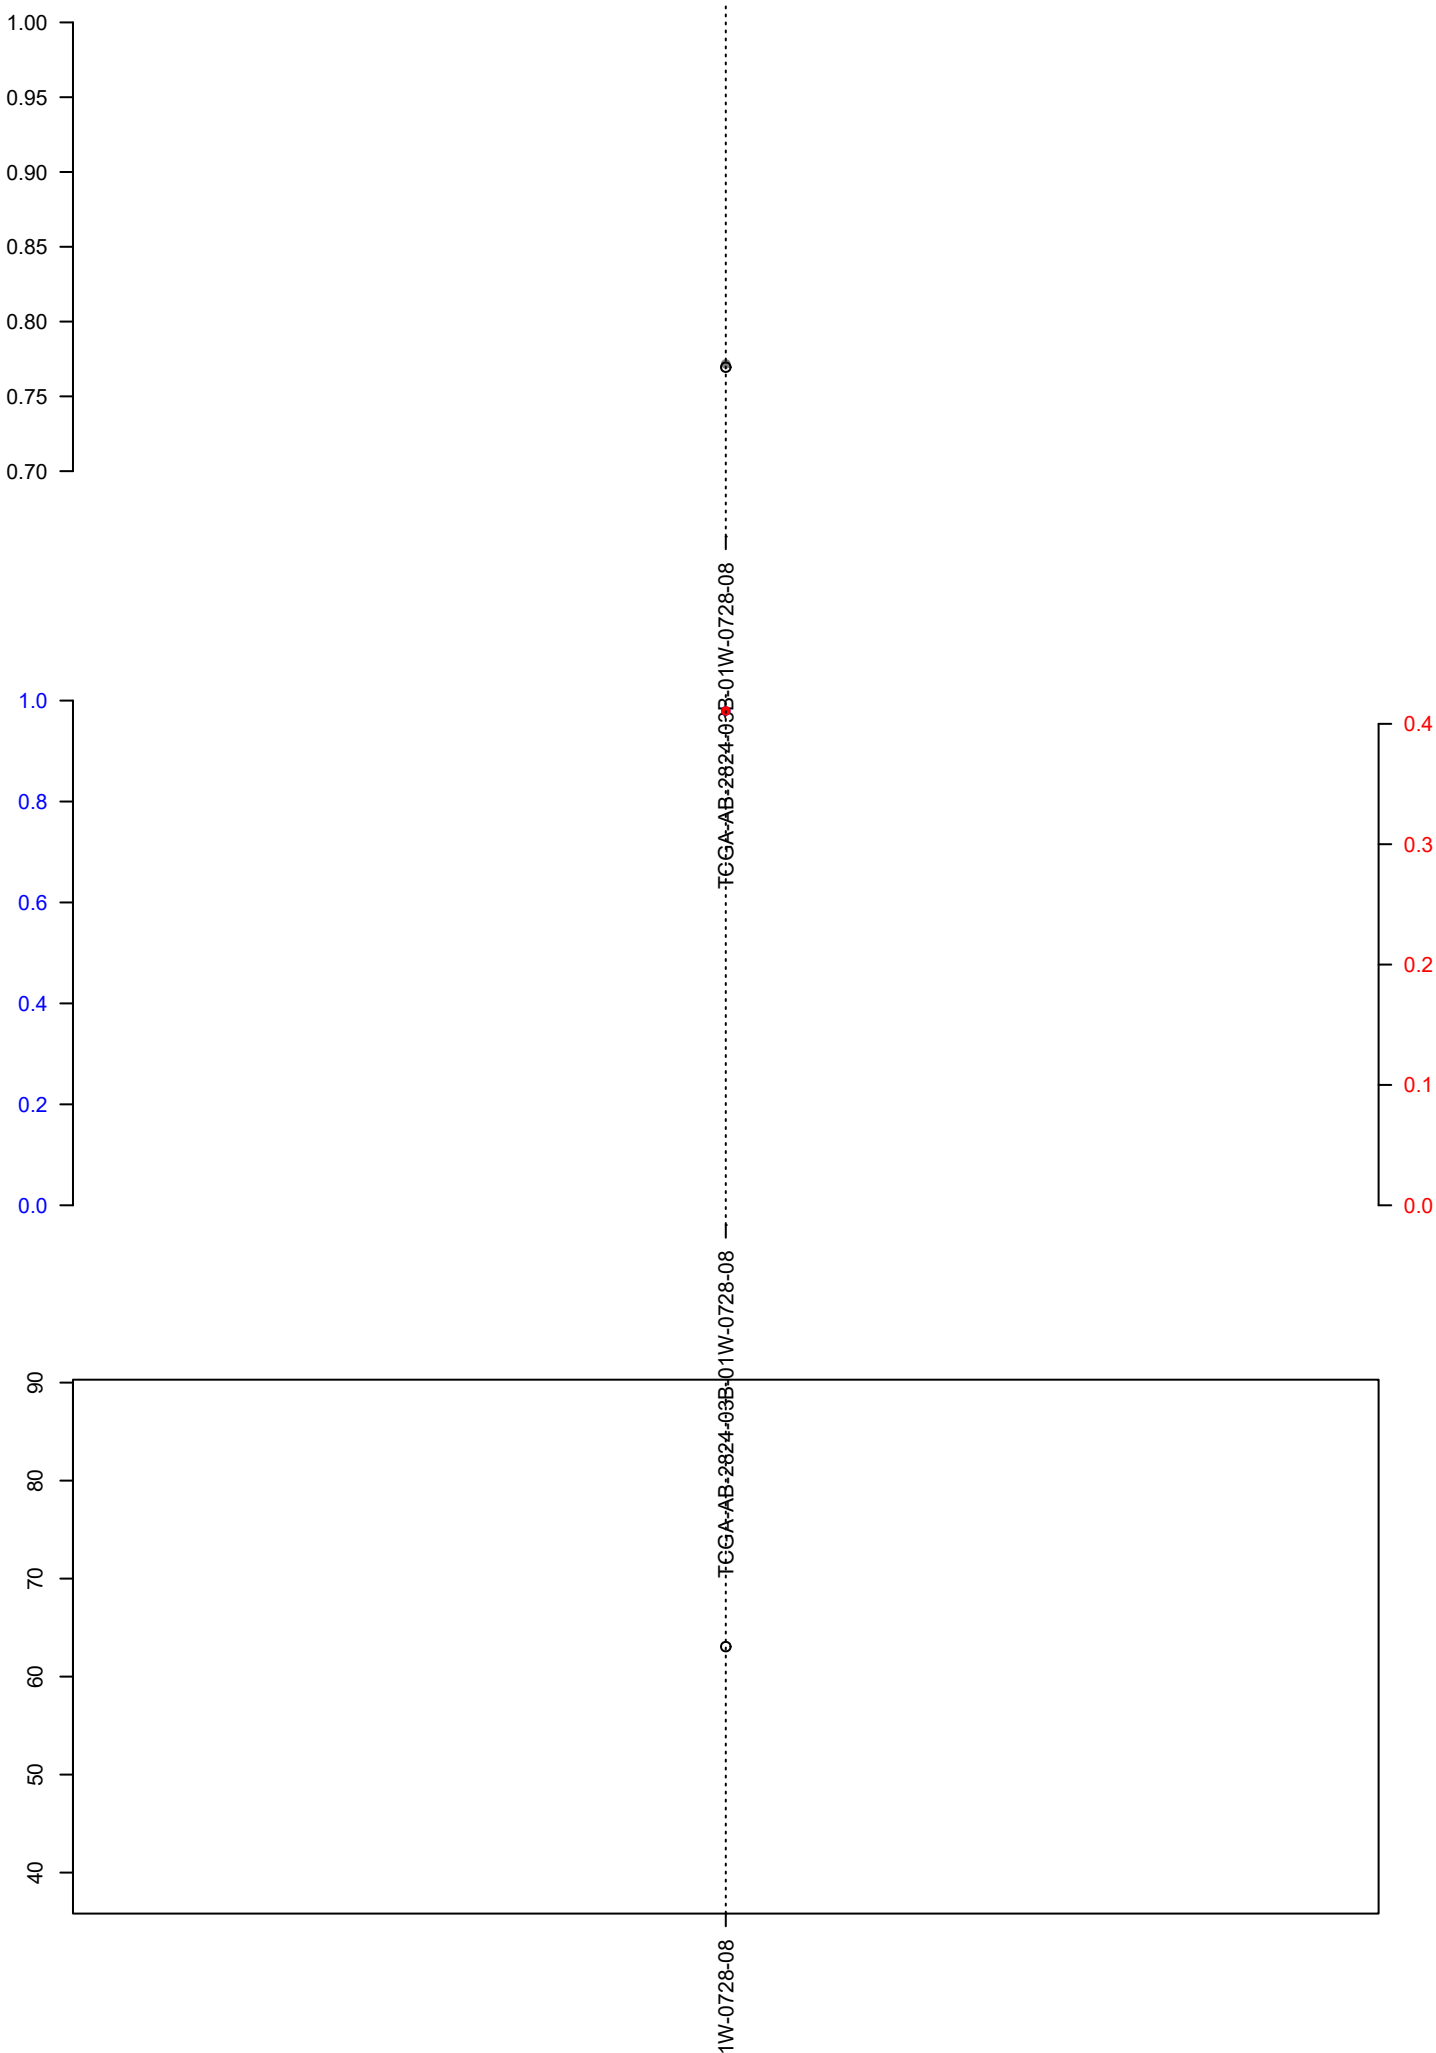

Supplement: Supplemental_Data_S2.zip [file TCGA-AB-2824-03B-01W-0728-08.reconstruction.err.pdf › Supplemental_Data_S2/mSigAct_output/TCGA-AB-2824-03B-01W-0728-08.reconstruction.err.pdf]

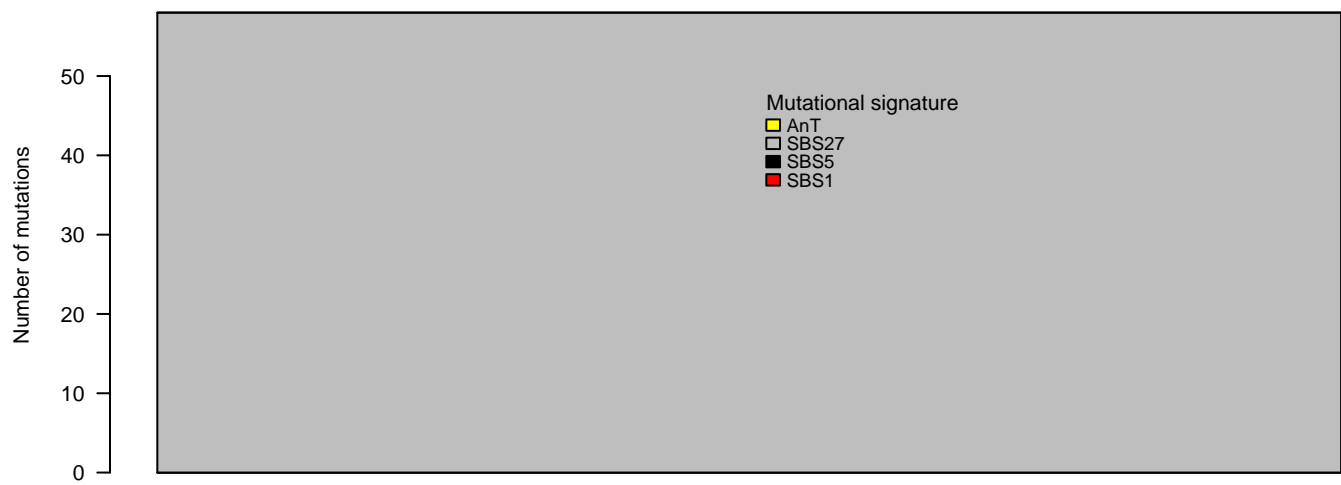

Supplement: Supplemental_Data_S2.zip [file TCGA-AB-2851-03B-01W-0728-08.exposures.pdf › Supplemental_Data_S2/mSigAct_output/TCGA-AB-2851-03B-01W-0728-08.exposures.pdf]
